# Supplementary material for: Single-cell microfluidics facilitates the rapid quantification of antibiotic accumulation in Gram-negative bacteria
Source: Lab Chip. 2020 Jun 16;20(15):2765–75. doi: 10.1039/d0lc00242a (PMC7953842; doi:10.1039/d0lc00242a)
Supplement: Supplementary file 2 [file LC-020-D0LC00242A-s002.xlsx]

## Sheet: WT_growing_1
Time (s)	1 bg subtracted unnormed	2 bg subtracted unnormed	3 bg subtracted unnormed	4 bg subtracted unnormed	5 bg subtracted unnormed	6 bg subtracted unnormed	7 bg subtracted unnormed	8 bg subtracted unnormed	9 bg subtracted unnormed	10 bg subtracted unnormed	11 bg subtracted unnormed	12 bg subtracted unnormed	13 bg subtracted unnormed	14 bg subtracted unnormed	15 bg subtracted unnormed	16 bg subtracted unnormed	17 bg subtracted unnormed	18 bg subtracted unnormed	19 bg subtracted unnormed	20 bg subtracted unnormed	21 bg subtracted unnormed	22 bg subtracted unnormed	23 bg subtracted unnormed	24 bg subtracted unnormed	25 bg subtracted unnormed	26 bg subtracted unnormed	27 bg subtracted unnormed	28 bg subtracted unnormed	29 bg subtracted unnormed	30 bg subtracted unnormed	31 bg subtracted unnormed	32 bg subtracted unnormed	33 bg subtracted unnormed	34 bg subtracted unnormed	35 bg subtracted unnormed	36 bg subtracted unnormed	37 bg subtracted unnormed	38 bg subtracted unnormed	39 bg subtracted unnormed	40 bg subtracted unnormed	41 bg subtracted unnormed	42 bg subtracted unnormed	43 bg subtracted unnormed	44 bg subtracted unnormed	45 bg subtracted unnormed	46 bg subtracted unnormed	47 bg subtracted unnormed	48 bg subtracted unnormed	49 bg subtracted unnormed
0	0	0	0	0	0	0	0	0	0	0	0	0	0	0	0	0	0	0	0	0	0	0	0	0	0	0	0	0	0	0	0	0	0	0	0	0	0	0	0	0	0	0	0	0	0	0	0	0	0
5	189.698	-308.785	-299.929	-48.7289	102.56	42.7599	-153.465	145.08	-96.7188	63.6648	-146.907	167.753	64.9232	-90.1898	-61.5103	-120.534	-129.592	-197.369	-65.34	-621.069	-124.688	-161.935	-208.994	21.7288	158.835	-391.191	-199.795	-177.32	-326.846	34.5928	-131.69	100.648	53.7933	-166.16	-166.728	75.2225	73.0818	-88.2907	282.562	-208	-411.603	-170.055	183.447	-29.1576	48.1389	177.655	-120.324	-74.3072	-10.0384
10	-4.44605	-172.139	-392.616	27.9232	58.102	-105.264	-83.085	26.6868	-140.143	-81.2262	-41.7052	74.3725	-68.6557	-283.712	-198.774	-431.02	-92.2958	26.5648	-130.063	-268.087	-270.075	-48.9129	-181.588	202.107	30.7105	37.2508	45.8967	-249.678	-146.989	-84.5447	-318.55	-121.934	-11.8632	-183.551	-62.4947	-142.281	262.927	27.4394	222.479	-19.9078	-62.6197	-308.419	138.278	-143.711	226.248	1.52806	-198.138	98.1404	21.3667
15	-26.9843	25.174	-572.944	-81.6944	18.7202	-49.1596	-158.81	-155.362	-245.207	-112.706	-216.07	-110.636	-75.9576	-135.602	-424.608	-265.516	-146.233	-217.32	-337.438	-268.061	-496.192	-193.474	-337.192	-108.772	49.0346	-739.949	-83.2925	-399.294	-362.743	-333.93	-277.525	-97.6753	-54.6036	-301.985	-172.304	-304.164	-121.609	-276.752	50.5445	-241.548	-403.04	-556.626	296.273	-260.666	-29.6778	-112.244	-378.179	-237.143	82.4175
20	-68.3373	-27.1036	-667.711	-121	-350.085	-248.078	-242.182	-0.25721	-267.925	-116.386	-267.313	12.1106	-94.5358	-84.5724	-157.231	-213.719	-250.525	-184.009	-99.7552	-482.324	-198.506	-111.188	-337.055	162.349	-91.2361	-298.808	-313.303	-284.199	-12.9583	-185.881	-320.44	-172.358	67.342	-160.07	-413.31	-270.789	-252.868	-215.837	-134.855	-323.209	-130.155	-524.285	191.757	-314.009	-128.824	-100.125	-184.669	-47.6795	2.02252
25	139.143	-318.419	-543.378	66.9246	-131.889	-385.532	-242.867	-89.3028	-144.893	-92.8398	-252.705	-91.6781	-75.1036	24.9719	-535.961	-245.038	-444.659	-57.2541	-243.882	-312.733	-334.469	-52.0633	-347.133	-90.1466	-70.5743	-505.744	-288.081	-559.306	-212.855	-25.1351	-179.848	-193.893	18.4229	-88.2906	-469.696	-331.262	-343.094	-258.464	55.3169	-90.3547	-134.419	-477.899	-168.167	-474.8	-90.1094	-163.03	-193.52	-110.002	104.964
30	-24.1269	-247.69	-487.293	2.96073	-22.2629	-269.349	-259.965	-123.158	15.0715	35.9361	-169.44	184.448	-170.826	-393.254	-245.729	-434.091	-309.057	80.0779	-280.021	-520.479	-491.169	-43.8485	-294.253	-88.5902	-226.439	-400.861	-250.573	-510.14	-367.044	-232.923	-350.263	-173.445	-7.38984	-360.715	-296.306	-68.2335	-171.957	49.6839	-49.0746	-178.043	-425.304	-434.486	4.42963	-456.483	-52.422	-363.386	-103.992	-231.901	-88.2903
55	-276.478	-329.63	-603.058	-299.249	-422.103	-259.397	-130.903	-60.6465	-44.7144	-40.7262	-447.349	-417.473	-45.8113	-284.132	-379.408	-370.688	-248.116	-269.43	-270.837	-533.421	-131.483	-33.1898	-234.785	-189.978	-226.753	-722.376	-448.062	-400.185	-345.719	-137.15	-482.607	-363.625	-109.274	-210.019	-350.116	-259.147	-427.385	-195.118	-0.94118	-337.944	-267.848	-406.28	37.1165	-386.475	-166.419	-10.854	-483.41	-117.254	-224.346
60	-156.046	-208.439	-666.437	-199.401	-167.534	-125.568	-434.876	-148.92	14.4359	127.114	-741.546	-413.53	-220.895	-574.081	-366.996	-407.734	-201.534	-657.065	-247.27	-573.401	-416.53	-127.777	-483.334	-171.15	-282.177	-985.581	-551.782	-776.668	-424.674	-289.883	-615.104	-457.322	-313.639	-408.352	-432.487	-185.861	-315.263	-566.097	-134.509	-611.927	-350.792	-534.426	-96.4085	-952.508	-147.267	-472.903	-540.087	-263.634	-149.338
65	214.786	-340.86	-474.999	-122.169	28.9533	-226.247	-320.142	-251.835	132.1	-35.5162	-239.182	-303.319	-44.6947	-12.4332	-284.931	-218.581	-678.717	-32.2403	-95.2095	-552.558	-146.405	-125.363	-340.116	-54.1511	-133.81	-789.896	-261.161	-460.119	-253.619	72.178	-280.967	-171.279	-213.152	-96.2927	-396.206	-309.347	-38.4481	-148.455	190.376	-437.34	-355.946	-492.419	94.8608	-600.539	15.2083	-157.518	-317.03	-245.6	-138.359
70	-194.443	-199.995	-461.285	-183.289	-56.7363	-156.471	-200.862	-76.7548	-156.628	148.745	-285.408	2.99553	90.2436	-136.421	-272.833	-374.563	-158.792	-237.522	-281.176	-444.23	-343.961	-295.245	-76.9846	-250.584	-263.053	-580.407	-231.285	-552.249	-209.477	144.396	-203.181	49.7782	-301.962	-395.188	-254.018	-232.92	-154.401	-143.967	-19.7055	-177.494	-363.447	-292.474	-27.2497	-490.562	-12.0002	-234.628	-334.687	-4.90335	81.2314
75	-194.846	-259.502	-422.041	-158.466	-58.3887	-326.175	-0.72981	-74.968	122.991	47.1144	-371.282	-92.7927	90.7793	-184.647	-204.059	-154.064	-346.478	-323.702	-160.418	-529.697	-273.417	-407.224	-234.114	-319.817	-329.25	-683.496	-226.974	-374.849	-172.65	-418.906	-386.031	-285.041	-64.7392	-292.991	-311.426	-219.462	-339.393	-70.2606	-49.6855	-229.795	-510.731	-619.549	121.405	-603.721	-98.3194	-145.624	-373.698	-323.305	78.0199
80	-179.027	-284.113	-541.839	-264.211	-34.9712	-114.774	-180.384	-343.779	-120.885	124.252	-320.208	-240.606	-177.691	-120.044	-517.107	-458.898	-119.098	-238.182	-383.332	-549.412	-373.017	-224.609	-484.184	18.412	-200.108	-902.569	-450.111	-676.814	-76.2127	-111.129	-450.328	-386.408	-260.787	-299.865	-675.46	-263.069	-402.782	-340.748	23.0511	-410.689	-476.232	-424.014	95.8618	-663.771	-257.096	-218.188	-253.277	-171.817	-82.0458
85	226.483	-230.899	-567.471	-62.7375	-275.075	-106.833	-329.885	-258.897	0.48577	-76.2286	-508.898	-373.875	73.1075	-115.53	-273.176	-573.624	-357.688	-226.229	-200.858	-360.664	-272.933	-75.9794	-324.783	-203.956	-138.78	-833.8	-122.728	-331.908	-223.232	-358.088	-409.683	-184.694	-323.397	-293.86	-440.05	-322.476	-234.084	-129.053	-25.0172	-317.953	-148.11	-491.358	-96.5677	-639.033	-212.605	-528.504	-201.752	-57.9859	107.567
90	-304.283	-187.352	-363.831	-195.072	-149.304	-372.422	-309.488	-355.632	-99.2395	295.123	-243.013	-318.691	42.3782	-65.0439	-358.725	-243.25	-203.387	-208.796	-350.912	-514.943	-207.113	-85.4408	-119.485	-106.12	-454.574	-558.048	-116.37	-302.272	-230.01	-262.29	-399.455	-368.251	-190.739	-190.79	-313.851	-342.851	-326.093	-63.7408	-25.0368	-303.758	-345.397	-372.122	95.2848	-872.272	-87.5454	-322.894	-242.876	-7.16207	12.5078
95	-355.12	-258.651	-353.457	63.5075	-285.159	-367.494	-358.561	-305.519	-31.973	116.613	-462.62	-248.441	-173.506	-347.132	-411.987	-373.731	-499.878	-168.863	-343.789	-530.641	-249.075	-124.44	-513.102	-67.4085	-163.592	-840.14	-232.771	-579.416	-416.713	-225.725	-630.789	-298.958	-257.49	-343.104	-503.772	-268.752	-382.051	-147.466	-221.401	-49.4186	-166.283	-431.033	-16.7669	-797.317	-259.285	-200.916	-389.877	-345.304	-137.187
100	-30.7861	10.1741	-551.362	-196.654	-172.924	-234.384	40.5423	-259.922	-178.198	64.8097	-352.319	-88.3747	-28.4295	-201.697	-357.958	-273.355	-433.635	-398.388	-332.456	-400.826	-280.746	-227.311	-369.393	35.2431	-198.406	-559.288	2.40411	-628.978	-205.832	-62.7043	-531.214	-202.422	-265.001	-141.374	-378.809	-169.192	-308.288	-414.885	-105.523	-224.373	-382.193	-294.394	203.26	-765.307	-121.931	-321.542	-603.426	-201.231	-5.60691
105	-86.3844	-425.259	-582.449	-29.2734	-440.327	-347	-449.906	-461.755	19.6793	54.0419	-239.209	-302.858	104.234	-192.044	-530.25	-169.639	-470.616	-237.695	-204.215	-670.39	-205.769	-383.283	-357.688	-25.442	-290.116	-889.985	-167.051	-522.809	-340.34	103.322	-558.783	-329.203	-248.468	-60.3084	-506.848	-80.8331	-176.798	-202.017	214.975	-70.3365	-360.218	-557.338	34.4849	-1029.47	-10.5546	-282.611	-404.733	-340.034	25.5232
110	-153.576	-181.622	-463.716	-374.101	-245.212	-332.019	-368.321	-276.669	-152.269	-24.9578	-446.05	-88.9292	-193.189	-266.781	-602.663	-405.561	-625.693	-317.15	-544.944	-540.239	-226.896	-354.761	-389.505	-187.404	-158.146	-891.315	-251.981	-716.931	-291.2	-21.4079	-476.06	-126.047	-261.385	-321.287	-548.531	-222.722	-468.163	-334.664	87.9516	-466.807	-363.697	-244.133	-109.589	-838.07	-191.343	-170.733	-425.504	-462.034	-181.191
115	-321.53	-306.385	-719.478	-111.107	-111.75	37.8736	-387.846	-392.657	-241.302	-80.7752	-556.646	-101.034	38.3883	-153.112	-436.212	-263.562	-482.877	-262.365	-104.638	-532.86	-332.3	-114.856	-444.538	-241.861	-121.897	-701.273	-63.0019	-252.591	-449.964	-60.2987	-341.754	-21.311	-337.873	-256.5	-429.393	-175.548	-318.344	-147.148	166.604	-237.052	-295.563	-352.236	-156.454	-544.561	-24.7187	-234.486	-256.366	-337.302	-195.617
120	-249.361	-121.353	-779.496	19.0656	-381.617	-510.125	-419.95	-346.38	-90.4399	-155.359	-455.549	-102.089	65.6748	-153.241	-445.468	-475.376	-550.377	-301.372	-61.1143	-511.493	-231.213	-267.423	-380.027	-329.672	-93.8958	-1018.76	-174.748	-640.809	-177	-12.0965	-649.765	-335.723	-466.736	-290.078	-339.997	-62.8216	-208.206	-287.869	161.589	-441.749	-395.65	-611.918	-79.4186	-654.328	-384.607	-243.608	-541.237	-163.98	37.3042
125	-130.687	-168.225	-561.708	-54.5629	5.5141	-512.99	-210.121	-259.379	-45.0253	32.2182	-302.781	-57.4611	55.7783	-267.945	-501.94	-502.562	-375.686	-455.734	-120.043	-543.87	-273.594	-159.406	-373.252	-102.453	-238.484	-486.945	-211.096	-619.611	-238.313	-260.89	-605.45	-355.721	-335.461	-273.553	-307.382	-367.583	-39.3389	-298.781	-267.91	-222.471	-382.319	-459.572	-4.54037	-562.986	-138.322	-444.973	-264.376	-389.756	-246.852
130	-90.2449	-320.841	-739.138	-181.662	-127.165	-193.985	-379.63	-327.091	-169.595	108.492	-492.853	-276.033	-99.7664	-319.099	-706.377	-622.793	-173.089	-411.793	-443.125	-698.345	-177.754	-317.545	-548.663	-150.456	-302.918	-893.094	-366.724	-497.421	-455.688	-241.399	-430.079	-233.802	-289.662	-206.126	-358.067	-193.084	-477.476	-378.799	90.1765	-256.311	-441.473	-457.85	25.1777	-507.3	-333.915	-242.845	-675.232	-297.983	-385.941
135	-256.289	-227.992	-652.55	-156.08	-427.071	-296.264	-340.036	-223.585	-464.602	39.763	-130.629	-232.375	-161.321	-79.0534	-292.756	-522.832	-484.168	-418.21	-284.384	-490.174	-412.671	-312.245	-921.416	-222.166	-235.014	-718.319	-333.361	-587.486	-327.956	-306.256	-398.789	-350.022	-220.227	-90.796	-485.388	-204.712	-273.745	-88.3982	-48.3377	-281.987	-491.644	-467.818	224.843	-809.265	-420.923	-288.572	-594.425	-510.943	-178.239
140	-434.593	-265.888	-433.455	-164.494	170.686	-320.977	-162.203	-288.647	-135.834	99.7387	-354.695	-449.901	143.555	-221.807	-109.023	-592.597	-496.386	-532.097	-470.637	-568.317	-370.871	-521.636	-481.429	-150.6	-229.062	-569.831	-402.794	-511.505	-130.733	-17.2578	-335.703	-452.867	-277.4	-346.669	-445.081	-280.298	-211.808	46.363	53.878	-273.427	-247.282	-502.555	170.573	-329.993	-195.373	-254.651	-342.239	-284.662	-404.698
145	-488.888	-326.053	-591.69	-302.063	-158.74	-568.243	-189.82	-566.443	-257.166	-69.2967	-146.406	-318.151	-231.618	-233.488	-547.347	-484.508	-373.614	-380.133	-475.516	-585.359	-365.465	-278.66	-153.649	-336.507	-333.706	-612.237	-275.041	-541.325	42.9952	-144.363	-359.747	-206.197	-316.267	-358.192	-386.308	-83.9484	-377.489	-266.847	-240.725	-389.894	-378.447	-624.278	235.51	-531.109	-103.48	-496.274	-404.538	-375.931	-320.764
150	-211.445	-352.738	-707.558	-400.56	-244.743	-172.711	-522.833	-352.844	-232.741	-117.925	-256.64	-108.588	-253.92	62.1797	-345.529	-320.302	-529.2	-364.91	-399.758	-577.802	-385.401	-252.734	-377.337	4.2078	-117.985	-665.105	-80.596	-488.812	-262.137	360.308	-287.201	-295.898	-330.554	-318.574	-496.646	-277.118	-280.88	-366.522	-162.311	-272.912	-355.922	-424.206	270.355	-1033.8	-129.886	-237.589	-388.346	-291.692	-53.8672
155	-633.187	-443.785	-592.691	-377.498	-407.022	-354.64	-453.971	-387.62	130.823	229.489	-661.024	-82.2465	-46.6369	-346.974	-243.128	-534.389	-589.186	-262.345	-235.171	-577.224	-300.549	-246.09	-139.141	-352.252	-444.62	-557.212	-557.678	-518.45	-146.845	12.5702	-425.915	-326.59	-431.232	-317.078	-590.737	-361.841	-335.718	-230.439	-300.298	-261.69	-443.061	-489.174	-23.6852	-801.847	-129.712	-358.602	-392.772	-398.421	-201.956
160	-198.603	-462.719	-669.159	-369.44	-452.508	-405.138	-264.119	-274.297	-156.535	234.879	-227.21	-178.665	-30.8664	-238.955	-437.304	-274.923	-341.271	-410.607	-340.513	-765.938	-324.342	-250.124	-547.693	-271.264	-366.503	-586.551	-210.442	-779.382	-285.046	281.844	-579.347	-522.723	-462.048	-240.509	-408.899	-229.794	-284.901	-520.027	-123.235	-225.121	-280.885	-507.778	-215.302	-240.021	-224.141	-443.513	-318.1	-494.925	-293.511
170	-456.27	-488.329	-765.748	-131.292	-327.335	-304.508	-330.383	-477.888	-447.62	-250.193	-445.77	-409.105	-275.871	-373.854	-480.963	-328.672	-729.802	-672.912	-458.497	-598.614	-298.998	-367.427	-510.441	-542.342	-484.175	-705.773	-470.951	-744.217	-554.802	-64.6237	-656.169	-602.8	-322.186	-534.181	-494.645	-452.616	-407.635	-40.137	-527.346	-762.695	-484.703	-746.965	-354.757	-1238.73	-345.064	-354.129	-569.161	-705.735	-549.381
175	-217.796	-380.047	-503.602	-139.382	-22.7903	-623.63	-294.37	-338.067	30.4531	147.369	-260.594	-321.081	2.4797	-149.308	-539.563	-531.876	-564.906	-291.257	-332.686	-232.445	-212.433	-224.365	-309.933	-115.314	89.593	-471.252	-438.942	-585.522	-288.14	123.997	-249.55	-300.772	-496.477	-517.498	-497.055	-330.16	-131.372	-309.522	-113.065	-442.339	-420.623	-315.977	135.9	-473.243	-230.91	-367.381	-467.83	-389.126	-152.352
180	-292.977	-54.1013	-337.77	-72.0278	-123.007	-421.933	-299.607	-369.772	-131.169	153.607	-660.036	-225.766	-259.71	67.841	-309.421	-435.927	-644.481	-484.085	-439.25	-382.859	-346.956	-380.142	-456.924	-137.413	-572.396	-696.638	-373.15	-675.61	-143.838	43.9759	-465.841	-182.211	-369.097	-370.831	-328.363	-419.657	125.082	-293.712	-47.9974	-356.514	-230.87	-513.127	20.1296	-756.656	-116.276	-367.559	-500.308	-367.461	-345.931
185	-341.05	-530.083	-667.702	-282.391	21.124	-317.328	-676.036	-305.422	-173.425	45.4932	-419.94	-147.66	-265.464	-370.278	-474.896	-478.215	-717.646	-340.182	-302.496	-495.039	-390.842	-427.971	-199.22	-124.679	-237.584	-807.632	-261.962	-450.478	-492.758	-101.933	-595.99	-379.429	-45.6713	-600.096	-486.23	-308.962	-203.727	-318.915	-124.995	-299.097	-204.644	-737.709	106.164	-661.355	-220.848	-527.392	-476.255	-449.085	-256.853
190	-150.498	-287.554	-456.138	-176.765	-112.344	-219.026	-273.53	-388.668	5.91112	-39.0846	-374.298	-28.5219	-141.89	-21.08	-282.699	-379.757	-549.692	-266.942	-109.318	-557.475	-454.79	21.9875	-186.588	-51.8861	-369.398	-131.857	-243.753	-394.64	-289.005	164.749	-307.38	-160.445	-103.791	-22.958	-508.85	-24.9749	31.5219	-218.056	55.2924	-114.534	-29.5741	-589.905	-118.357	-584.12	-383.665	-468.567	-458.618	-397.983	-135.794
195	-203.286	-206.371	-461.523	-53.5419	154.272	-434.473	-90.712	-369.198	-172.281	99.7626	-316.923	-239.023	-149.932	-298.941	-369.598	-298.801	-277.577	-404.035	-277.774	-362.82	-261.784	76.4837	-116.711	-49.0193	-192.197	-576.487	-352.307	-653.204	-193.578	83.5267	-346.046	-174.342	-333.638	-274.968	-348.805	-211.686	-295.477	-284.355	-113.444	16.6912	-68.5187	-310.745	88.9181	-433.143	55.1168	-287.971	-365.771	-416.338	-183.994
200	-49.2856	-169.107	-388.491	-332.522	313.376	-350.609	-514.973	-295.906	-23.043	310.088	-619.043	-109.079	-233.3	-511.313	-286.143	-306.609	-293.139	-201.209	-270.825	-474.502	90.6628	-52.348	-179.364	-135.644	-262.215	-704.319	-398.865	-731.461	-268.957	-146.724	-230.953	-284.782	-267.129	-141.782	-226.911	143.119	-103.54	-185.764	51.0615	-87.0914	-49.2818	-221.647	31.083	-445.125	68.2707	-221.603	-157.255	-146.255	-131.458
205	12.7884	-141.345	-596.348	-230.672	226.046	-457.623	-380.803	-328.727	36.8708	74.3871	-279.44	-118.586	-75.0205	145.501	-282.5	-154.354	-412.306	-184.898	-203.819	-414.782	-146.869	163.771	-169.24	-213.368	-58.0694	-784.099	-330.932	-480.154	-80.1048	-26.5803	-388.286	-27.119	-303.637	-190.786	-239.826	-130.179	-2.03596	-28.2574	106.897	-87.8481	119.567	-320.597	217.569	-367.501	19.3962	-287.286	-348.797	84.6767	-233.603
210	-108.181	-8.5911	-460.787	-117.186	115.879	-328.333	108.816	-261.819	153.427	316.467	-300.252	-106.598	9.12402	-108.009	-321.535	-310.958	-252.492	-175.234	-144.801	-276.647	-254.248	17.743	13.2112	-256.254	-229.181	-421.374	-256.992	-606.292	-169.019	-75.8722	-297.428	152.991	-83.9498	-303.181	-258.304	-37.5251	-199.314	-320.108	184.411	-60.6338	-91.0437	-421.289	-12.9204	-293.118	-16.2794	-438.299	-123.632	39.1893	-78.3747
215	-108.007	-71.2161	-299.983	3.89484	139.578	-206.908	-51.7494	-107.647	240.987	209.255	-483.274	-1.33547	1.2612	-164.541	-234.196	-238.64	-320.294	-201.157	-78.0984	-282.91	-19.7247	76.7321	-66.0032	-205.926	20.7335	-668.278	-237.439	-453.126	-113.19	8.1803	14.3037	-56.6078	-247.654	-346.702	-264.41	233.43	7.68792	-423.49	385.194	4.96425	207.215	-7.81795	115.524	-341.123	38.9252	-334.861	-5.5602	-257.67	-211.466
220	-132.655	-35.8117	-384.995	-13.1389	208.703	-248.39	-101.723	-290.063	74.8283	561.987	-308.572	33.7901	325.956	130.262	-66.2825	-192.338	-200.141	-81.2467	-170.47	-476.562	-302.8	41.4323	-116.228	-97.2632	-161.37	-48.6142	-202.4	-671.087	-187.057	32.5577	-331.874	164.923	-16.1478	-277.62	-156.249	119.874	184.797	-345.163	227.84	96.8809	-18.0752	-115.996	151.388	-268.969	-107.609	-340.089	85.8897	65.3169	-256.464
225	-94.5352	-223.189	-295.526	55.0278	241.966	-142.512	41.3558	-387.303	96.228	258.1	-451.546	-108.047	81.6627	330.825	-127.942	-366.488	-346.936	-169.431	-326.3	-368.026	-365.285	-39.2721	-134.252	68.2173	-0.57651	-682.469	-58.1987	-521.372	-342.624	19.4118	-316.372	-129.48	-57.6286	-253.758	-462.504	128.753	36.9352	-94.8566	727	58.7998	156.493	-396.678	63.0551	-285.681	-7.8346	-347.435	-54.2087	-29.7499	-394.457
240	-69.7324	30.3471	-239.757	-188.948	-139.714	70.3333	81.3173	-191.1	170.673	255.817	-264.815	127.495	153.801	346.481	24.25	-161.414	-251.523	57.5934	-132.233	-316.339	-129.017	329.074	-90.8392	-206.876	-4.26316	-76.9317	138.486	-298.309	141.98	-14.6526	-130.777	168.759	-79.9513	-177.714	-210.299	182.898	425.971	-267.513	301.827	29.0822	86.431	-79.1365	178.983	-170.546	81.7301	-132.412	-185.957	187.432	-35.2518
245	-373.233	76.1961	-92.6708	-8.04532	407.265	-175.586	51.323	104.665	76.3919	351.068	-138.583	-200.576	-170.8	204.901	-235.107	23.1283	-250.45	-56.7729	-90.8255	-200.937	-213.564	342.164	55.4474	207.099	67.4118	-494.074	66.8477	-399.494	-45.1465	322.392	-150.847	268.527	78.6749	-248.29	-147.583	6.8905	506.006	69.6336	271.363	33.8367	305.734	-290.484	140.738	-57.4445	203.976	-151.492	-43.6667	48.897	-242.835
250	-154.088	-123.933	-107.074	136.125	263.932	-313.365	187.806	-0.77936	223.697	577.579	-379.755	186.027	2.3977	211.368	-140.224	-149.019	-267.039	-108.747	-122.8	-218.125	-58.5606	138.685	70.3156	50.0681	-85.647	-216.122	85.7859	-246.69	-98.6286	298.683	-18.5555	96.6333	-119.238	-150.065	-119.916	266.927	423.914	-69.3778	312.321	200.239	287.532	144.985	196.749	-63.3682	-24.3579	-176.905	129.525	19.4377	-329.232
255	115.63	1.61185	-263.367	289.706	21.0632	-48.3479	244.482	-178.09	160.366	446.693	-306.528	76.7773	102.135	-108.286	-22.2988	-406.446	-350.136	-219.519	288.545	-220.861	-36.8462	221.54	199.724	308.791	-218.986	-189.278	-52.2809	-323.917	-384.605	226.711	-185.768	20.513	153.245	-124.44	-104.428	280.521	413.222	27.2935	198.02	13.7869	280.279	176.269	284.438	33.6285	154.124	-239.22	2.60952	-196.069	-267.987
260	-10.9551	62.4151	-440.602	-30.75	211.669	28.7857	-64.1018	-77.6743	261.83	287.505	-293.657	-7.22273	147.688	75.3911	87.0367	-175.69	159.711	-12.2039	-139.513	-186.193	-92.9215	326.665	-26.3883	181.207	-230.01	-310.608	-22.5639	-291.465	-323.067	277.742	-170.757	58.3663	29.8698	-253.903	14.4309	365.167	-45.1554	3.81119	422.555	236.556	89.1433	-100.401	51.1978	444.4	51.4049	-279.961	163.373	173.812	-246.795
270	158.338	69.5159	-155.311	31.0886	201.457	-104.003	-156.219	-94.6607	197.932	462.989	-253.823	-214.764	152.836	189.338	49.3	-230.435	-226.834	-198.695	-271.693	-208.557	42.5366	94.9991	103.51	196.98	-155.395	-356.847	-139.541	-351.567	-273.466	-63.4731	-147.683	260.505	172.384	-362.316	252.057	237.752	340.355	-52.1418	89.318	188.258	319.163	119.24	-205.791	457.452	181.818	-76.3393	61.2952	213.599	-17.5973
275	188.41	95.4905	-204.291	24.6006	66.0499	322.258	186.602	-69.041	421.871	525.566	-166.547	103.152	-34.5716	105.76	-18.4167	-213.655	-353.367	-215.665	-166.569	-565.585	-241.722	-27.4953	67.7417	73.5428	-129.767	-372.007	-186.699	-214.55	-307.855	123.326	-75.1042	34.3113	-99.2442	-41.9978	58.1881	230.506	370.775	117.825	403.667	284.471	374.228	51.7954	129.858	6.72801	116.534	-108.225	219.148	189.563	98.3748
285	140.373	49.3368	-303.155	263.148	476.796	180.466	168.108	-17.8022	543.94	340.497	-420.369	-126.684	203.751	107.802	97.0033	-359.397	-203.226	-36.1193	-51.2606	-311.434	41.4095	186.147	26.0546	-105.633	-104.067	-156.534	107.171	-73.0257	-294.887	-43.5899	26.1106	178.997	-50.9243	-65.2781	127.259	313.399	91.8141	-58.097	373.22	-28.2489	12.5686	-161.599	173.204	322.294	176.083	-197.316	195.9	-4.71987	-78.498
290	269.485	152.441	-141.547	89.6676	351.211	187.683	126.447	63.314	414.872	417.686	-252.114	43.9741	225.758	-87.9933	24.224	-139.639	-430.626	-81.7779	-12.8275	-452.329	-112.936	177.271	194.657	448.518	-67.9868	-296.965	33.3314	-413.486	-158.725	66.5638	-145.768	239.402	111.321	-67.9869	70.3948	327.064	328.583	-153.082	442.461	87.2926	263.435	-85.6287	86.9102	281.425	222.275	18.4562	-45.6073	166.176	112.03
295	150.25	246.391	-174.983	214.056	287.907	22.8246	230.968	-13.0156	382.232	467.086	-271.899	60.9884	255.494	347.644	-134.862	-360.183	-18.9143	56.4523	-53.7793	-268.861	0.72466	98.3417	143.421	347.456	-124.677	-184.6	-242	-228.953	-159.423	48.2167	-279.997	324.121	-68.5884	-190.5	42.9764	441.727	294.422	-3.64308	378.127	133.787	238.638	-45.343	190.801	35.9268	320.61	-212.839	180.028	-58.6187	2.26358
300	293.499	161.298	-399.475	-43.3219	301.163	388.047	118.478	1.56641	412.75	467.847	-120.25	-53.5122	33.3669	441.719	101.669	-184.85	-101.905	-32.2883	100.251	-458.437	30.4378	354.829	127.975	242.849	-149.283	-333.27	-35.3062	-585.856	-113.899	-148.898	-62.841	383.52	151.098	-56.0297	148.98	473.049	259.776	-139.789	359.129	269.051	-16.0056	91.9396	379.68	-43.1962	243.705	-75.9496	152.774	303.438	-96.7958
305	101.216	256.378	-147.313	-121.019	254.25	210.574	86.6898	85.6352	719.668	430.393	-459.076	-89.6429	164.986	305.67	111.458	-368.395	-270.226	-184.029	-93.6375	-273.382	-398.244	211.842	-135.24	106.513	213.255	-777.203	-119.467	-466.198	-218.209	-144.134	-240.438	220.518	-93.9829	16.235	-89.5896	454.532	-42.2494	-102.733	297.515	64.7453	172.046	8.16813	164.49	116.336	94.5477	-74.9736	54.4047	81.9631	-55.654
310	-193.745	106.203	-228.758	33.5599	107.923	54.0505	202.831	-10.9196	351.978	366.357	-346.853	-15.2	222.467	-187.225	-68.75	-183.609	-75.2958	-156.582	-91.1835	-99.6604	-305.896	229.26	313.995	188.854	-59.8425	-543.924	-106.406	-418.468	-110.377	-185.218	-173.519	199.331	-100.368	-112.923	94.1162	218.788	211.409	84.0781	356.755	34.9849	329.242	-55.5471	-101.748	449.572	147.777	-267.657	107.272	176.535	59.7281
315	300.561	199.648	-39.9504	18.6204	252.796	242.81	44.3084	81.0942	451.873	487.982	-192.695	110.461	203.629	283.402	61.0291	-318.94	-332.13	19.2214	133.903	-245.124	-78.1415	261.341	308.688	329.688	78.8939	-467.203	-145.27	-109.608	43.0285	-281.123	-9.51206	173.836	-31.1786	30.0855	179.299	266.423	307.679	1.50395	224.886	98.8726	340.299	-53.2735	107.34	200.127	386.027	-401.424	423.278	430.727	4.88281
320	361.52	325.416	-108.691	-16.151	122.968	224.175	183.199	69.8164	413.429	562.416	-371.94	89.1068	83.0163	291.325	15.3981	-272.415	-257.586	326.178	-1.73036	-233.37	-93.5892	163.966	159.015	321.067	17.9862	-331.831	53.7861	-518.29	-172.781	-60.7677	-97.8278	414.909	92.4485	-203.543	247.146	568.68	396.255	55.638	478.457	251.342	123.63	196.836	68.1245	338.723	79.7639	-38.875	175.172	177.684	-119.336
325	315.95	176.447	-161.62	-3.60824	252.108	293.722	107.08	311.172	571.103	352.788	-275.932	279.271	21.8585	448.635	1.94512	-405.774	-281.604	133.467	-202.964	-198.629	-404.473	304.732	300.654	74.4922	26.2785	-693.203	-110.686	-134.417	-161.152	-347.075	-15.027	346.19	75.7082	21.415	151.459	427.854	353.689	378.187	65.6868	240.11	202.569	182.506	394.492	287.192	232.916	-163.823	174.886	247.301	-137.859
330	132.494	392.218	-37.6489	139.502	322.231	243.609	126.179	223.284	511.375	696.269	-348.151	235.925	161.436	13.0589	129.997	-314.606	-436.027	-61.7597	14.2615	-449.649	-142.7	176.148	73.6685	262.432	-121.436	-656.572	-156.412	-155.553	-251.044	-30.9952	4.97691	240.818	210.004	-96.4356	247.903	354.207	121.61	134.855	406.706	263.661	479.455	197.59	157.255	311.456	451.948	-232.605	-18.6939	96.1846	-463.688
335	254.593	316.779	-123.012	268.604	401.058	136.76	93.2676	-27.4542	848.159	628.535	-219.129	150.655	303.894	233.438	3.66667	-294.079	-376.847	-18.3709	-9.43348	-462.399	-122.853	374.8	60.8557	364.204	-3.79657	-553.321	-195.592	-294.752	-75.3889	-195.912	-46.9667	377.412	57.4548	27.0345	72.2605	612.564	179.789	-348.488	152.712	398.573	177.027	61.3974	43.0719	122.281	189.219	-34.8462	102.954	235.04	-141.867
340	210.383	151.132	-358.77	4.09017	-78.5523	172.781	29.151	96.9125	474.591	483.422	-462.123	134.204	390.236	82.0851	-57.514	-371.184	-289.099	-407.87	-164.297	-438.663	-32.6128	326.026	31.8733	154.25	-284.763	-200.881	-175.132	-382.656	79.7063	-222.677	-156.854	171.971	-213.635	-164.953	227.696	485.11	154.88	-276.371	69.8145	-131.802	40.2331	2.31538	88.4715	-26.3533	174.801	-297.882	48.0816	-43.42	-206.367
345	103.562	114.182	-292.141	150.437	372.66	13.6167	-76.0214	204.226	430.267	590.675	-465.193	6.94394	304.524	164.936	-99.4441	-158.8	-143.428	-335.695	-105.238	-328.985	-150.234	64.2153	9.99686	204.221	-99.3936	-824.401	40.596	-282.03	-105.037	-172.044	-116.38	327.251	32.8859	-127.526	-8.68336	589.912	40.8928	-55.7536	447.833	-77.6486	107.28	-99.0054	275.216	129.193	368.305	-159.531	-112.055	150.78	-177.803
350	200.21	37.191	-272.632	113.156	62.2324	142.848	-94.1513	-99.1989	496.521	416.511	-307.178	217.761	426.018	129.44	11.5233	-158.507	61.625	-82.9506	-337.749	-314.494	56.9054	125.64	259.51	270.599	-106.336	-129.662	-175.103	-519.164	-107.091	-402.621	13.1705	518.921	-137.654	16.6454	91.5571	438.135	277.483	112.406	164.04	-123.107	325.686	67.662	75.3027	360.497	243.56	-176.895	18.2756	402.139	-191.377
360	-88.2042	77.6391	-235.281	-37.2906	144.529	176.855	-210.878	57.9208	233.356	395.308	-316.796	-49.8566	206.151	-317.572	-178.427	-203.456	-362.641	-189.125	-205.263	-310.471	-12.0112	195.913	-84.4761	204.753	-47.6579	-339.752	-138.787	-374.337	-448.365	19.3657	-167.341	136.402	-108.767	-198.204	72.3268	512.968	20.4576	-305.357	-10.1213	-266.698	139.039	-69.1923	159.164	83.3084	215.908	-74.9169	332.27	419.647	-177.351
365	172.868	132.983	-521.85	-23.272	321.737	-31.4491	-206.139	-243.772	362.87	374.934	-652.543	76.1803	210.88	-22.3788	-369.075	-202.367	-11.9958	-135.924	-442.67	-320.324	-123.119	110.216	-110.761	102.726	-211.846	-652.56	-247.651	-433.402	116.478	84.2123	-118.601	390.77	-191.566	-370.452	286.278	455.593	213.924	-332.161	227.81	90.4809	115.216	-11.7369	156.164	-11.0058	252.279	-211.731	17.298	190.74	-305.789
370	96.5786	76.2845	-216.5	-158.598	123.016	-127.308	24.0159	-94.4429	277.28	539.291	-448.959	166.384	193.549	-222.74	-261.149	-212.619	-84.3093	-173.987	-220.758	-356.395	-89.7312	-15.2924	27.9983	-5.08407	-362.217	-467.792	-306.747	-522.25	-46.3126	27.8337	-78.8069	289.301	-239.294	-310.441	195.739	191.808	198.509	73.9402	-24.7459	-222.613	132.653	-0.01542	1.33963	-29.7174	332.486	-104.934	-76.4744	103.746	-456.779
375	91.7636	160.562	-374.971	-236.998	-245.52	-11.5515	-326.556	-5.56728	225.919	168.877	-539.129	28.7555	221.866	-390.126	-367.438	-358.684	-129.57	-352.366	-205.593	-514.179	31.3271	191.249	40.0113	259.506	-381.656	-633.279	-416.328	-541.419	-288.193	129.21	-430.569	175.961	-186.34	-345.669	-7.25658	416.285	-77.0407	-169.067	146.905	-291.796	-11.2751	3.91496	60.1296	63.19	220.677	-387.946	-26.7591	363.362	-445.878
380	55.5926	-226.722	-490.733	-207.194	31.337	-135.635	-205.796	-292.211	219.234	443.735	-636.519	-218.356	162.518	-565.694	-736.051	-389.21	189.04	-241.31	-311.908	-646.87	-221.793	67.7123	161.925	59.2173	-512.706	-279.011	-240.783	-725.986	-299.036	-135.435	-408.004	-247.994	-484.332	-277.689	126.319	327.703	61.2733	-448.796	-138.225	-550.066	-317.324	-184.952	-151.1	-247.545	38.6139	-381.675	-238.832	-54.7488	-491.823
385	-422.727	-115.419	-577.209	-169.756	-413.874	-323.562	-244.464	-262.916	-30.4599	108.232	-775.97	19.8099	120.125	-616.179	-815.85	-713.741	-220.934	-335.46	-219.785	-743.441	-582.075	-203.027	-175.792	-128.259	-271.623	-818.916	-586.23	-837.928	-303.938	-145.339	-428.131	-273.598	-153.904	34.9102	-131.075	309.405	-386.504	-296.512	-252.666	-494.714	-392.794	-203.444	-157.07	-765.784	-128.228	-402.924	-130.144	-62.3451	-756.767
390	68.741	-66.7293	-688.385	-49.7203	-163.355	-255.895	-371.87	-190.818	281.033	343.573	-539.881	216.702	324.298	-754.662	-518.743	-169.208	-275.534	-200.554	-279.061	-537.174	-343.668	-76.0388	-46.7999	-63.7546	-533.826	-375.949	-555.722	-787.534	-290.046	-284.317	-211.484	-86.4056	-149.449	-378.453	127.671	161.747	71.3716	-196.135	-332.611	-437.167	-220.653	-469.718	-193.11	-315.265	118.031	-204.816	-114.6	-121.345	-705.112
395	-160.257	173.534	-508.278	-4.23291	-160.987	-233.216	-230.965	-412.386	-195.457	294.064	-642.469	-38.8824	130.162	-817.187	-711.447	-535.701	-135.364	-178.266	-383.461	-766.419	-267.632	73.1159	290.639	174.058	-327.892	-299.096	-712.092	-600.158	-277.342	-185	-253.46	-90.7636	-134.585	-216.5	65.3841	626.608	56.8536	-143.215	-28.0346	-495.449	126.136	-233.802	-122.228	-158.582	-163.431	-348.433	-211.472	-265.02	-477.359
400	-464.507	-216.185	-696.378	45.2538	-249.582	-401.926	-525.897	-580.024	-78.8744	55.7276	-742.857	-213.698	74.8136	-895.62	-856.06	-604.429	-241.838	-263.148	-404.852	-494.913	105.778	-138.007	108.063	-120.744	-570.831	-570.606	-766.723	-921.35	-455.425	-84.4197	-320.426	-357.151	-549.596	-575.352	-97.8436	185.15	-275.667	-477.802	-192.645	-523.261	-133.931	-410.509	-199.256	-113.305	-73.4549	-443.271	-390	-172.9	-898.653
[truncated: 66 more columns]

## Sheet: WT_growing_2
Time (s)	1 bg subtracted unnormed	2 bg subtracted unnormed	3 bg subtracted unnormed	4 bg subtracted unnormed	5 bg subtracted unnormed	6 bg subtracted unnormed	7 bg subtracted unnormed	8 bg subtracted unnormed	9 bg subtracted unnormed	10 bg subtracted unnormed	11 bg subtracted unnormed	12 bg subtracted unnormed	13 bg subtracted unnormed	14 bg subtracted unnormed	15 bg subtracted unnormed	16 bg subtracted unnormed	17 bg subtracted unnormed	18 bg subtracted unnormed	19 bg subtracted unnormed	20 bg subtracted unnormed	21 bg subtracted unnormed	22 bg subtracted unnormed	23 bg subtracted unnormed	24 bg subtracted unnormed	25 bg subtracted unnormed	26 bg subtracted unnormed	27 bg subtracted unnormed	28 bg subtracted unnormed	29 bg subtracted unnormed	30 bg subtracted unnormed	31 bg subtracted unnormed	32 bg subtracted unnormed	33 bg subtracted unnormed	34 bg subtracted unnormed	35 bg subtracted unnormed	36 bg subtracted unnormed	37 bg subtracted unnormed	38 bg subtracted unnormed	39 bg subtracted unnormed	40 bg subtracted unnormed	41 bg subtracted unnormed	42 bg subtracted unnormed	43 bg subtracted unnormed	44 bg subtracted unnormed	45 bg subtracted unnormed	46 bg subtracted unnormed	47 bg subtracted unnormed	48 bg subtracted unnormed	49 bg subtracted unnormed
0	0	0	0	0	0	0	0	0	0	0	0	0	0	0	0	0	0	0	0	0	0	0	0	0	0	0	0	0	0	0	0	0	0	0	0	0	0	0	0	0	0	0	0	0	0	0	0	0	0
5	112.546	-96.7996	13.9023	-107.281	-398.779	-102.466	73.0114	2.88755	263.998	89.2742	85.0295	37.7174	8.62609	61.1731	-136.26	-200.087	-435.786	329.141	-0.3175	-317.975	-65.824	-56.3756	205.472	138.402	-458.453	-145.111	-87.2763	138.907	55.7846	223.219	44.9524	-7.60829	169.761	-39.4669	130.986	-171.141	-24.2718	-84.7266	-105.735	259.241	-89.4548	107.216	169.417	30.489	42.9294	-271.339	-11.1069	90.317	-67.0567
10	-83.2647	-207.825	-12.4494	-245.13	-87.7421	-131.92	-35.9452	66.6866	93.6229	-79.4247	-101.957	152.643	157.395	-107.299	-161.274	-338.499	-504.409	-1.09729	84.8016	-243.994	13.2246	-197.852	286.864	78.1463	-230.524	-33.9618	-90.4327	139.849	25.3251	82.4545	79.8041	-127.948	-76.5956	-180.461	190.01	-16.7507	-173.538	12.1544	70.4346	38.6705	121.879	45.7916	221.145	150.167	166.516	-274.975	30.1207	-59.882	-62.1601
15	85.2214	-27.6037	360.8	307.62	228.141	-138.263	125.729	-13.7407	474.568	21.7375	205.645	100.006	30.2222	236.606	-67.4427	-69.7623	-100.753	-138.36	269.146	88.0169	182.391	11.7721	243.872	466.537	-55.3903	-13.555	366.376	-18.4997	332.474	287.588	867.988	82.7899	410.783	325.366	-36.7169	20.1807	173.687	125.214	65.0842	-9.95211	-109.007	-66.7372	153.794	297.947	153.417	-115.9	352.944	120.557	-19.3842
20	213.534	-186.437	-117.874	-34.0404	-53.4276	-55.3065	30.4614	32.2494	137.474	-196.914	-124.942	-45.9829	-94.8471	102.066	-213.46	-25.859	-363.769	-139.566	-60.3073	-267.642	-133.492	-114.836	313.896	-4.2884	-403.427	59.9716	54.6557	162.871	229.049	302.782	98.7149	-203.752	65.9444	-161.237	-97.9947	-177.698	36.0913	-134.696	-140.497	-73.4305	-26.1302	-174.267	-145.393	88.9454	40.78	-153.725	137.581	32.9373	-286.506
25	49.1564	-164.041	-91.7058	-83.5491	-114.756	-47.2489	-26.7753	-178.095	195.343	-129.733	167.099	108.09	3.28636	156.135	-72.9858	-16.712	-126.186	-130.302	67.3243	-261.549	127.185	-163.583	339.822	294.264	-301.504	-117.158	183.63	35.8137	201.067	407.692	213.744	-96.292	135.624	-51.2699	141.039	17.6797	5.22567	160.483	-14.1753	-40.0425	-14.9818	75.5707	180.947	167.154	219.201	-78.1308	12.9587	46.7748	190.205
30	284.402	-24.7113	-96.5766	-35.2102	-61.413	54.423	2.03651	-70.2669	324.262	5.36506	215.228	52.0304	-1.24211	19.8463	101.844	94.1986	-478.233	-107.634	104.411	-167.006	129.906	-224.094	101.046	192.086	-226.134	148.414	-17.4644	146.586	197.319	191.845	138.497	57.2027	-165.898	-22.5233	174.944	-126.467	-64.8484	80.1949	-150.097	-53.2096	128.572	-117.156	243.714	123.629	240.231	-224.998	167.443	211.833	106.377
35	-165.548	10.1759	-144.768	-148.56	-64.3212	-132.169	21.9412	-124.001	109.401	93.7071	84.4522	47.7667	-16.4688	35.3765	37.936	-126.02	-307.186	-295.019	37.5288	-83.3214	-26.0552	36.4209	147.028	242.238	-211.088	21.5095	-60.8301	71.6543	119.438	303.747	-21.7004	-125.202	85.7044	72.9538	-50.2902	-7.93651	-21.213	-67.5786	-164.349	-128.013	42.6179	52.5623	-39.2351	5.3172	83.6875	-64.3962	166.467	174.859	-198.732
40	207.783	-198.043	-170.702	139.052	-116.79	-392.106	-35.2316	-70.0046	360.162	63.8177	-132.748	2.16895	-44.0392	58.7889	-131.698	-130.259	-781.385	-230.006	118.109	-173.106	74.0612	-65.4719	198.383	110.906	-198.186	-50.1658	-176.317	162.538	22.1822	-113.212	144.383	-218.309	128.093	-50.0996	1.52631	-118.461	-126.125	-41.8935	-284.018	1.64479	-124.05	-191.439	-12.4627	-8.90876	195.982	-188.121	223.799	116.154	-39.1629
45	181.587	-170.138	185.751	43.9316	-19.9623	-109.472	40.1767	95.2734	285.33	69.1987	181.876	114.573	125.436	-107.526	-205.938	167.718	28.8333	-21.8603	177.612	-160.324	-26.2873	-40.2282	245.537	215.29	-62.6492	90.6235	52.1291	174.711	161.602	913.782	141.813	57.4406	163.704	-38.9603	-14.2037	171.237	-100.707	-55.1628	-54.0141	-123.475	43.3419	158.063	45.158	155.362	50.3474	124.667	430.399	150.852	-23.4297
50	262.807	-166.914	114.656	94.4256	-38.295	-146.813	121.279	-95.1315	427.043	36.4809	107.996	157.527	59.3364	117.754	58.8429	-126.299	48.0583	31.4374	166.326	-55.1176	39.7439	-132.68	422.862	223.357	-295.039	-5.0499	33.616	189.315	28.6667	323.121	257.964	-195.77	91.9624	-60.0396	168.913	-95.9031	82.1863	12.0849	105.256	95.878	160.258	203.288	-72.3982	247.785	172.763	-137.968	352.676	152.121	-127.188
55	16.8062	-281.318	-223.544	133.932	-226.043	-379.47	119.132	-167.53	123.385	-25.8059	229.263	192.982	-73.6311	-2.84722	-353.796	28.3066	-123.533	-143.541	103.51	-160.75	-166.229	-251.697	131.627	10.599	-67.4897	-96.6993	523.633	87.6431	134.608	158.039	263.19	16.5774	31.9574	-371.445	-74.1611	-75.283	14.9421	-107.038	-72.0477	-119.828	-41.331	-202.236	-138.185	8.47516	91.5659	-164.79	135.237	-1.42735	-16.3357
60	127.018	-107.422	120.695	187.292	-26.2589	-181.233	40.4378	104.918	208.869	66.789	132.675	313.708	18.84	314.469	-25.9542	-76.454	121.471	-107.773	201.376	-304.115	59.7694	37.0111	275.577	230.586	-85.7257	92.2888	664.558	332.257	208.728	-55.2523	263.219	-71.667	171.306	-16.1026	279.515	-51.5299	-9.58938	14.6473	-58.3634	-56.4161	222.448	139.695	-305.294	102.412	370.135	-77.9946	135.583	-39.5045	124.117
65	116.27	-174.662	-68.795	19.3523	49.8998	2.76844	68.5941	-30.7538	106.526	4.81014	-116.412	152.913	-52.9149	32.64	13.7204	-289.157	-188.625	-206.951	25.2188	-65.7938	61.6204	-309.371	360.298	17.1143	-301.034	-39.4459	-99.1429	156.621	198.208	131.715	237.601	-91.1046	184.077	-18.5739	229.531	-38.5707	-203.563	60.6793	-22.3211	-101.05	51.244	46.6447	224.987	252.937	127.606	-269.89	225.892	20.4471	-46.5606
70	151.83	-121.282	48.4993	-19.9352	91.2219	-20.4629	180.705	101.539	375.567	-104.15	13.0772	125.129	-122.525	86.4015	8.29718	23.5657	-244.991	-236.112	33.3808	-202.886	76.6704	-18.2669	162.078	133.114	-155.04	3.22497	60.0432	127.177	335.719	200.178	159.426	-74.4833	284.598	-5.87921	369.621	28.7789	160.254	-79.6044	-60.6655	-24.6272	-7.82423	239.107	224.279	172.987	378.385	-125.497	415.168	245.42	122.527
75	406.629	-62.4275	87.9931	229.905	-259.454	-120.146	45.0564	6.71908	290.268	-129.988	59.8042	143.231	-96.2871	154.083	141.069	-94.0651	-319.863	-119.384	146.183	-164.167	-20.8855	-112.58	494.2	101.925	-270.868	102.315	-27.5124	203.875	440.4	-385.629	122.19	-58.1874	175.467	-176.645	56.017	59.7921	143.028	-21.8132	-48.6651	-130.413	160.845	-47.1731	52.4314	165.823	350.997	45.812	262.818	352.149	42.9196
80	106.146	-254.045	-105.383	-269.437	-107.622	-291.334	-46.14	-187.457	88.3715	-96.0139	-56.1786	-47.0171	32.1822	-104.964	-116.888	-283.015	-415.208	-328.211	-177.933	-246.866	15.6936	-164.097	114.061	98.1674	-248.635	-87.1816	-204.064	56.3508	88.4713	84.4183	19.3956	-216.291	-48.8768	-61.3098	94.454	-20.8855	-173.664	-73.406	-58.7091	-53.9089	-2.25339	-222.468	-1.38499	50.203	18.9077	-192.268	68.4389	-129.647	-142.309
85	78.0056	15.4885	-211.665	77.1496	-354.505	58.6841	72.0547	-81.6018	273.76	-32.2828	15.1804	140.359	-43.05	18.0708	18.3117	-148.727	-181.563	-139.197	-74.477	-237.097	46.7598	-197.933	162.985	72.2175	-331.462	-25.8233	-108.289	161.374	212.055	144.608	74.5537	-196.147	110.864	-176.353	150.05	-123.885	-111.356	36.3269	-121.313	-22.0359	235.562	-69.3135	-132.281	135.242	360.139	-112.078	245.395	94.7845	81.9471
90	-86.0405	-111.413	-104.65	210.72	-46.163	-119.704	-82.9366	101.382	241.785	-67.3345	-47.8578	216.543	94.9505	-40.46	21.9643	-208.287	-560.536	-247.413	9.02816	-116.174	175.688	-240.575	239.198	176.927	-143.331	64.6723	215.54	167.125	163.067	85.3712	5.86542	-137.967	41.7426	-84.456	192.144	87.5495	-21.4026	-71.6472	-62.1312	1.32906	-70.9823	-14.2923	-115.648	182.185	43.9313	-51.1754	153.968	104.662	160.482
95	-63.9832	-174.349	2.40424	96.5135	-205.536	-83.2032	-173.181	-122.562	284.238	-151.935	174.705	224.948	78.1618	94.2991	19.8384	-156.476	-118.206	-65.3949	-70.6846	-258.994	124.153	6.71389	159.361	1.67474	-208.478	-9.71246	50.6929	112.303	256.998	165.337	172.017	-38.3346	150.319	-100.87	-112.031	-122.363	-155.73	31.7791	-115.207	-268.63	44.6603	-10.4544	-33.3704	2.22895	63.3468	55.6511	466.419	56.5449	-205.212
100	69.7856	-377.742	-96.6915	57.3569	-275.332	-225.509	-134.612	-78.6242	116.415	-118.17	57.1088	149.828	-11.2644	-270.913	-162.565	-261.931	-387.097	-201.88	-47.3184	-283.933	-24.0747	-249.547	208.568	-111.455	-515.659	-63.543	-257.721	-43.9548	191.395	-151.081	64.307	-215.849	54.3201	-298.302	87.1874	19.3883	-269.434	-43.4753	-483.027	-231.842	-88.9036	-76.8534	-245.509	64.4698	208.845	-355.445	352.17	27.8678	-86.4952
105	135.413	-174.707	-122.818	52.5298	-169.484	-373.311	88.0895	-57.1535	221.044	136.023	84.8039	153.821	-141.877	-209.056	-205.08	-189.095	-337.637	-66.1613	69.0625	-194.339	-44.3831	-237.654	122.505	-114.795	-370.431	-180.805	-198.033	158.753	165.85	181.488	0.90238	-138.138	78.8982	-206.257	58.1048	-249.159	17.4384	-67.8391	-293.866	-80.8742	-212.862	-184.071	50.2037	140.215	322.42	-135.161	226.939	112.204	-205.134
110	-171.884	-562.375	-396.393	-47.2702	-410.123	-193.221	-93.9076	-52.1246	-153.357	-23.1593	-115.225	-230.822	-214.959	48.0745	-166.106	-244.106	-399.344	-398.052	-190.699	-233.517	-92.3011	-251.576	-72.8026	-202.562	-423.024	-7.39385	-55.1335	21.2217	19.154	64.2238	-159.467	-294.628	-9.07532	-305.726	-40.7215	-49.1177	-159.067	-135.498	-256.105	-267.077	-190.802	-227.847	-112.923	-41.8034	-52.43	-151.2	-36.3923	47.5984	-129.658
115	-75.4376	-182.803	-41.8852	-315.987	-74.263	-194.475	82.6468	-91.815	98.7843	-0.14242	91.9742	123.67	100.469	-274.913	-119.502	-177.74	-101.006	57.2954	-53.4014	66.5061	-120.505	-36.5855	65.9998	139.541	-397.274	-189.245	31.4423	376.999	130.48	267.605	194.946	-112.643	24.2069	-158.485	140.239	5.27104	-12.7382	11.1	-153.324	-45.5958	142.858	101.309	-10.7897	101.937	337.004	-114.406	446.283	12.6699	-31.2241
120	11.1913	-395.482	-76.7356	-117.222	-160.931	-227.689	-122.415	-131.535	39.8867	151.508	41.7293	104.777	2.525	15.6308	-188.973	-63.8887	-555.583	-142.038	-160.116	-33.6268	-118.983	-170.991	175.846	152.262	-599.517	-238.821	108.737	125.327	44.5015	80.8103	44.6191	-238.21	41.2743	-267.612	-259.852	14.9627	40.3924	-158.631	-227.174	-102.338	-59.6439	-239.474	-93.9502	186.349	161.275	67.0355	148.027	124.556	-54.8564
125	58.304	-301.388	37.7295	123.693	-145.415	-288.146	-82.8557	-32.2377	50.2984	-131.227	214.583	166.518	3.75439	114.205	68.5775	-206.429	-552.521	-331.224	-37.79	-199.55	-129.577	-68.0002	85.0675	-68.1232	-224.463	-155.394	11.4483	137.25	79.9981	-188.775	75.9448	-71.6958	-105.927	-201.054	48.7017	53.5696	-145.223	-76.6702	-370.59	-44.0457	0.00791	166.655	-153.773	-50.9334	238.961	-84.9337	289.337	-29.0395	-23.5057
130	-85.8636	-195.518	-115.094	-131.894	-171.531	-204.092	97.3919	-112.056	231.712	17.1	-44.9545	64.9629	-72.615	7.39333	-44.9455	35.2782	-238.402	142.1	64.8125	-101.9	-276.662	-84.984	19.8595	114.377	-425.783	-200.035	295.754	93.3533	181.796	221.61	295.754	-122.815	16.2764	62.4803	-62.438	-34.1593	-41.7907	-9.33411	-93.6877	-38.552	-59.3236	-47.2302	-206.243	164.263	109.429	27.7346	345.745	262.452	-80.9975
135	55.0958	-21.8448	-4.93895	265.545	-298.098	-257.655	50.5509	17.2187	288.355	85.5565	104.974	65.2208	101.777	125.739	-1.73311	-18.9539	-322.524	292.842	-169.324	-1.77273	95.9197	-120.991	239.588	208.78	-201.166	-127.555	19.1175	3.61228	153.939	247.184	279.511	-140.035	195.992	14.1402	183.74	-32.1462	-24.92	-100.933	-122.327	-104.824	111.202	103.46	-67.2107	244.461	279.32	-1.99562	273.507	113.362	-124.769
140	44.5888	-121.924	-276.643	-187.325	-407.284	-311.733	-81.5396	-99.3573	-43.8024	-116.842	-92.5773	-17.6269	-83.6429	-157.835	0.62913	-297.296	-490.417	121.116	-157.831	-252.723	107.649	-541.896	6.17599	-32.8237	-459.419	-79.7316	-194.301	163.181	48.0968	-42.7121	115.99	-265.543	67.8907	-52.6921	-120.356	-23.6309	-94.67	-57.8995	-339.006	-123.848	-221.089	-23.9968	-130.25	81.9771	178.948	-182.051	280.712	-28.0669	-194.438
145	-283.849	-269.332	-293.144	-50.4622	-268.699	-258.681	-19.9034	69.5012	222.817	-198.738	-119.438	168.32	130.505	-83.5368	-101.223	-230.471	-260.714	11.8089	-342.452	-141.483	-241.637	-163.959	136.137	56.3588	-476.699	-44.0432	15.2337	-44.9208	59.5665	246.353	219.594	-218.662	48.749	-318.97	84.9944	-209.209	-201.365	-194.648	-211.83	-149.671	-44.048	-266.89	72.3042	-1.80768	16.6765	-156.902	220.533	-8.60448	-155.659
150	-51.9958	24.8292	-295.746	145.484	-162.086	-361.679	78.2115	-72.2975	113.671	-147.339	271.06	60.905	-41.1753	-182.167	-64.4459	-252.063	-200.5	-75.653	-238.789	-112.294	-240.015	-73.1746	252.648	3.62754	-114.293	201.726	-36.3777	149.055	74.2143	144.978	83.231	-430.228	-61.6183	-67.7828	220.018	61.0358	-105.336	-79.3491	-28.4186	-124.586	-130.456	-42.5689	-29.5262	0.53099	37.1988	-322.086	40.1952	196.004	-356.104
155	134.37	-394.27	-102.902	235.829	-462.104	-348.923	-153.841	-169.453	-89.9137	154.36	55.0036	23.7466	-11.5049	-83.9825	22.2796	-394.704	-624.821	-122.824	-37.3338	-122.131	-48.4212	-46.6302	32.2229	75.5385	-216.39	-78.7566	-122.121	38.7813	62.9472	-29.0358	363.863	-82.8592	43.0176	41.5728	-49.583	-63.3603	-85.9353	-200.326	4.92595	-69.431	-142.41	-133.011	-273.773	33.7772	73.4028	-227.121	40.2989	-31.3489	-370.97
160	111.469	-258.21	-170.747	51.6037	-273.109	-322.743	21.3928	-1.44796	205.887	-173.576	-58.9379	83.2915	29.7088	211.872	35.595	-67.8609	-238.752	-98.1674	75.3542	-40.6736	154.026	29.7108	201.369	36.2535	-333.73	110.153	-33.2734	45.0074	163.406	525.324	107.256	-61.9892	-21.5553	7.76701	-52.2991	63.4061	-112.087	-173.613	-88.6044	-168.935	54.2498	-83.7268	-211.666	-22.996	190.448	-144.114	185.604	72.081	-120.463
165	-111.527	-164.421	-177.678	52.3182	-262.451	-255.799	-98.0725	-190.552	269.349	-78.6568	15.4998	-25.3779	2.78723	-28.5417	-197.018	-197.454	-330.667	-18.4082	-191.961	-350.878	-227.758	-130.398	211.33	3.313	-386.338	-149.255	-64.3373	0.13686	-130.496	190.81	273.248	-291.507	-364.249	-225.037	-24.3944	-118.904	-272.329	-33.4361	-200.357	-1.06507	16.4105	-139.847	5.41138	247.559	42.2471	-183.972	156.557	101.423	-187.076
170	-69.893	-455.596	-438.099	-115.384	-493.886	-400.3	-261.654	-223.996	-60.7677	-329.195	-258.14	-295.359	-86.8616	-24.1296	-241.196	-424.9	-642.208	-252.363	-346.853	-254.418	-213.717	-305.912	50.8998	-155.151	-314.539	-154.869	-152.615	-53.2062	-64.2102	-26.2849	81.239	-305.889	-332.118	-232.874	-114.479	-238.316	-218.761	-144.106	-347.251	-106.234	-331.649	-238.9	-266.387	-188.57	33.32	-303.993	-23.7838	-4.54972	-511.188
175	-61.1729	-266.378	-182.504	-44.6596	-155.329	-344.717	-62.4935	-236.441	-64.2964	-136.173	-140.243	54.9184	-110.113	-349.51	-386.076	-300.954	-354.704	-227.347	-172.873	-322.077	-69.7556	-119.042	129.193	22.9908	-360.733	63.4019	-107.287	-97.23	160.556	51.6469	-55.334	-112.811	-94.8229	-12.3836	-72.4278	-128.725	-75.6436	6.2005	48.3768	-278.78	-12.3769	-104.665	-241.594	2.49267	-41.8851	-311.822	405.057	-72.702	-294.96
180	310.279	-22.022	-215.047	131.326	-63.9257	-121.194	197.93	106.178	393.396	139.127	108.82	209.019	99.1099	55.1915	-98.9738	148.941	-179.475	39.6028	-103.338	-101.566	174.925	-21.7951	182.68	45.9903	-258.696	46.6373	-38.3573	248.175	121.554	542.262	495.327	-89.5182	125.391	-23.6716	139.337	18.779	29.309	-72.8723	-77.0635	117.094	156.528	55.041	-12.4943	195.292	211.671	30.978	295.319	190.378	234.702
185	136.771	-347.413	137.806	92.289	-178.965	19.8448	101.221	-227.161	326.706	-45.7088	90.8721	148.171	173.158	47.7267	-144.432	-13.8224	-295.046	305.557	-26.9059	-58.0448	171.356	-362.591	119.36	219.388	-81.3833	-198.875	55.6223	170.358	51.3766	215.849	66.5899	-180.059	217.116	-364.635	10.2527	-216.198	-145.785	-262.994	-251.619	90.4457	-138.355	-150.762	-268.111	75.3376	58.3011	-113.837	221.2	22.2136	-160.458
190	143.226	-308.354	-12.9937	212.325	-469.998	-204.172	-48.1223	-216.302	143.805	-138.52	-46.0152	74.8349	34.7311	23.2765	37.8383	-141.609	-151.458	245.313	-39.4403	-411.859	159.647	-93.7469	210.817	36.2401	-237.896	-35.4407	-34.9364	69.0003	7.36607	200.629	157.218	-446.241	74.0396	-184.145	-76.3511	-1.33791	-148.047	-189.283	-334.056	77.13	-92.7472	-10.3875	-31.2213	-141.647	-2.2875	-246.497	375.623	116.706	-349.662
195	-33.2548	-243.568	-147.203	-66.1106	-429.844	-311.962	-171.119	-47.9218	64.9824	72.9125	27.3693	-124.584	195.032	27.0577	-191.655	-346.68	-274.886	-73.5091	-123.157	-298.556	14.298	-385.853	-39.37	59.1791	-271.504	-212.445	-236.49	-62.2022	57.4993	149.001	-48.3203	-199.453	-123.204	-240.648	18.6812	-259.868	-258.512	-238.564	-162.647	-184.35	-169.065	-96.6635	-74.3731	67.2077	-186.868	-12.1295	-46.3558	-156.5	-395.137
200	152.68	-313.413	-521.701	180.752	-345.171	-481.911	80.249	-120.124	294.283	-271.562	-95.3374	253.022	-44.2816	-76.3667	-98.6517	-351.062	-284.525	357.175	-227.818	-321.513	-2.12957	-349.573	-64.4678	225.601	-530.301	-199.807	39.3651	-26.7649	3.75317	281.262	-46.767	-328.838	-98.2579	-348.75	-22.3401	-243.03	-169.964	-175.352	-218.334	-107.629	-171.527	-139.605	-84.2644	-7.37112	-16.3398	-310.275	-54.8094	-31.2124	-238.357
205	-55.3133	-229.336	-323.124	30.285	-276.09	-295.947	-121.935	-133.349	295.291	-183.982	39.103	-69.0772	113.88	152.923	-70.4561	-401.546	-374.626	287.802	27.2766	-272.288	39.9399	-224.9	139.861	-103.733	-399.874	-49.5373	20.4424	33.5225	-25.0888	6.2829	60.1618	-311.616	-136.669	-378.112	-41.1734	-248.879	-296.552	-296.269	-437.879	-160.936	-152.172	-114.163	-366.27	-8.79932	-81.6195	-302.266	-43.1889	-157.307	-40.6042
210	25.1506	-128.298	181.408	281.61	-77.3433	-35.6195	248.891	-148.907	439.771	48.7776	158.087	87.2574	203.203	26.0027	79.0378	176.034	-393.781	832.001	75.7737	-31.1389	110.383	0.53977	175.999	125.261	-174.798	-29.6844	-24.5446	275.732	333.034	356.605	33.572	21.1394	130.314	-33.2185	-105.904	-23.0853	-44.4257	-2.72619	7.36884	-169.323	130.805	25.7444	-45.5305	428.436	306.822	55.7526	307.455	21.9503	-121.554
215	34.9447	-393.832	-52.0427	281.516	-385.022	-45.5454	-34.22	160.897	400.372	123.796	101.268	-12.5525	-49.6443	9.51626	-123.821	-398.248	-333.528	1650.46	24.1369	-150.755	85.1749	-98.2647	345.596	62.9401	-308.664	-150.828	52.7415	57.5072	97.823	264.205	1076.95	-212.181	262.571	-351.858	85.4853	-65.5566	-328.544	-346.131	-34.0144	-189.133	99.2229	-152.139	-239.206	72.6645	263.139	-217.468	380.095	37.1274	-22.9931
220	-98.6181	-250.952	-180.583	73.9958	-78.3488	-46.3645	235.699	48.9007	251.244	204.177	235.906	353.589	116.642	169.314	-0.74533	141.446	-267.972	194.762	149.066	143.831	124.772	218.048	68.5168	174.421	-217.083	-87.2478	217.577	195.782	224.991	410.288	555.774	31.9774	183.976	-66.1315	58.693	72.7157	125.506	14.817	490.238	207.436	215.715	158.708	-145.462	279.759	304.369	-79.1371	292.608	151.248	68.9441
225	82.1192	-222.827	-146.422	-164.003	30.7092	-30.6441	71.2173	103.2	545.191	66.9176	132.636	331.411	342.917	87.7764	-153.197	164.891	-187.471	14.8788	-129.965	-157.143	-11.0879	-168.247	32.0174	112.014	-372.867	68.4307	321.266	368.275	243.949	233.918	274.145	-59.5327	67.1159	-127.716	53.6862	-196.253	-100.131	-104.623	-59.5218	-58.4448	8.59722	-101.009	-73.633	27.9408	251.961	-180.511	407.634	179.404	106.583
230	-21.8913	-154.945	-269.224	392.183	-253.636	-52.6752	63.3111	-46.6432	402.353	14.3568	187.223	216.626	162.938	222.333	-189.513	-51.6996	-420.255	106.327	22.1145	-374.444	59.4348	-290.283	365.309	97.8515	-314.487	-37.4996	60.7509	71.5006	45.9761	327.28	87.8615	-65.6059	38.2398	-223.75	176.772	-9.8919	-254.2	-135.693	-75.6327	155.101	-63.0277	-172.882	-392.855	4.00881	89.1405	-172.163	202.572	-113.11	7.42654
235	210.088	-287.817	-135.844	330.603	-371.918	-84.9119	-71.314	65.4241	384.58	207.921	32.1237	146.3	199.971	-63.4977	123.411	-266.271	88.0733	-71.0247	88.8141	-190.049	69.4305	21.2345	98.7387	214.269	-295.745	-140.998	64.2892	155.264	116.097	362.163	207.131	-95.4172	178.733	-76.8817	106.105	21.9316	2.55065	98.7253	-162.332	57.1035	127.357	55.1938	-198.926	291.455	76.7838	-242.956	250.717	192.74	-35.1193
240	145.357	-152.638	-65.1869	-95.4514	-321.736	-94.4852	3.57245	75.1414	521.067	174.671	304.169	342.262	207.99	49.1441	33.8483	216.377	-194.789	261.121	4.12157	-276.766	659.245	-73.1663	20.8952	127.737	-227.401	-139.44	-59.4959	206.071	162.461	108.773	65.9716	-101.006	44.1671	-48.9886	117.734	145.403	-69.0753	98.4447	-326.584	-85.041	88.2228	-73.2139	-305.648	160.441	235.235	-103.82	228.356	127.741	-87.963
245	163.054	-125.314	71.5417	320.993	30.0138	93.515	88.3272	-82.2246	288.499	295.176	152.567	290.763	221.947	-41.0185	-228.256	-247.248	-308.604	34.2085	-98.2099	-154.408	179.666	92.4549	243.116	-107.236	-359.612	-108.436	126.026	96.7621	213.176	277.25	-29.0293	-169.089	124.904	-208.506	136.71	-181.958	-60.8475	-2.22525	-199.299	47.758	157.593	-269.502	51.1991	164.825	40.6743	-152.368	174.771	63.7434	-116.974
250	189.473	-261.686	-59.7123	-133.963	-342.914	-153.438	65.5349	30.6571	277.541	52.7573	206.083	242.691	156.691	-31.7104	-1.56729	-104.069	-56.7724	-111.073	-79.0711	-384.779	-177.244	-127.233	93.9051	235.972	-341.885	-122.245	200.974	104.106	101.758	86.1953	151.524	-30.3416	-56.3494	-190.719	106.189	45.5162	-7.28365	-146.837	-91.8179	-127.369	-164.275	-2.23877	-243.677	390.746	93.1224	-209.822	345.538	202.418	-146.215
255	57.1413	-174.747	-263.396	303.946	-183.607	-245.854	-124.801	-51.5692	179.862	203.464	476.952	324.952	51.018	-75.8765	-251.932	-30.3182	-71.1232	-14.3573	-233.222	-162.483	-145.763	-280.925	-78.9432	86.918	-315.662	-64.164	-164.382	117.353	219.861	47.211	173.268	-54.8851	258.285	-43.8923	102.625	18.0852	12.5254	-41.8519	-189.842	-129.131	-99.4446	-70.5874	-283.532	10.8852	94.7667	-123.479	222.306	-13.9329	-11.1319
260	212.641	-21.4055	-38.712	186.657	-160.361	-84.5062	216.353	-96.9283	369.667	184.509	330.295	366.571	332.49	39.7756	1.55684	-146.528	-473.348	-29.1232	-158.416	45.0241	116.22	44.3198	318.035	280.694	-178.858	-37.9153	87.6271	342.66	139.322	121.276	301.921	-32.8036	70.5438	35.5327	203.072	79.1394	-7.71716	109.537	-92.0726	54.6999	-29.686	0.5558	-225.917	139.411	-48.2662	-268.53	472.497	132.445	74.9564
265	33.3501	-144.068	-5.51038	99.9086	-146.246	-122.227	47.2053	74.4813	248.925	345.294	437.998	264.968	277.224	127.549	-90.462	-85.6652	-164.734	37.4159	-191.176	-38.1667	191.139	-33.492	169.359	0.20511	-398.493	-126.737	180.917	76.5888	331.413	421.88	84.1103	-227.728	247.926	-132.126	172.965	24.8807	-105.805	-54.0213	-34.0806	-38.1176	99.9255	-275.824	-115.914	136.308	388.441	63.2747	215.897	143.159	46.3454
270	190.969	-214.315	168.458	217.098	-42.0834	-226.294	190.205	65.6444	493.2	203.784	426.377	621.171	376.932	386.395	-106.718	-63.7736	-77.0303	-120.106	51.2318	-43.0195	132.384	-191.477	183.769	149.891	-164.494	-105.346	104.602	119.087	320.834	160.725	-32.2976	36.9149	198.746	37.8674	256.981	156.134	-181.671	-59.9535	-81.1348	89.5444	75.5997	141.898	63.1769	341.529	288.814	-63.8701	411.426	262.921	-48.7075
275	274.491	57.201	44.0822	191.175	-190.237	-15.5802	267.344	134.195	474.713	200.662	309.53	392.424	243.876	257.547	-248.373	56.6444	-118.715	230.527	86.0589	-314.43	378.895	-63.7828	212.391	107.143	-105.293	127.928	156.141	326.093	426.257	243.64	182.179	-95.8988	221.224	-24.6319	408.103	120.38	110.215	178.148	329.123	116.202	247.981	61.7229	-155.922	237.06	378.33	113.782	422.966	248.467	107.426
280	151.257	-173.732	-22.0714	159.742	-67.0927	-17.1031	219.082	292.691	430.213	80.9086	104.145	323.756	49.3798	204.728	-24.3409	-82.5774	-72.7957	150.053	-207.968	-158.478	133.852	-134.168	-25.4136	302.267	-241.994	-126.446	296.381	192.042	220.858	183.213	369.761	-82.0638	80.5631	-52.3567	23.6122	-56.8383	60.6288	38.3737	-265.688	119.092	-60.2679	-2.26199	-256.604	111.734	192.366	-240.99	435.628	81.8416	74.3688
285	-195.921	4.99107	-170.608	8.67888	-11.1102	-134.5	-40.4019	89.6528	255.996	222.186	439.151	394.777	310.536	-173.587	-201.793	-160.688	-309.065	-141.339	-307.367	-448.396	13.9706	-420.29	174.243	69.4583	-82.3445	-160.476	-135.226	194.247	95.0036	86.4962	-16.5871	-118.185	-35.1681	-95.15	42.0442	-203.027	-173.963	-168.556	-104.146	70.0933	29.4153	-273.728	-188.818	207.513	-89.1674	-92.0847	218.386	68.3475	-63.5903
290	-15.726	-91.4016	25.4535	-36.8601	-294.414	-211.571	122.65	63.0105	273.871	361.985	268.237	514.933	230.652	19.8333	12.1215	-113.339	-211.517	-142.754	-115.222	-271.169	-231.137	-293.597	151.082	207.336	-415.981	75.1559	97.2442	-45.3382	-21.982	348.868	334.502	-177.465	156.631	18.186	-69.3006	-55.2288	-137.543	6.57381	-196.329	-89.3538	-33.122	-154.747	-121.239	177.93	32.7838	-71.4418	87.6275	6.21362	12.001
295	304.034	29.5554	-10.5314	307.238	-80.6519	118.645	222.089	148.735	355.294	396.386	363.87	648.275	446.765	84.7489	130.634	258.433	15.9	199.001	-81.1538	-67.0161	86.5337	59.8198	220.607	234.569	-44.9438	273.843	96.3191	355.969	368.43	385.188	403.151	118.317	-3.07598	67.4977	183.172	179.891	82.7402	184.204	108.541	220.693	52.3314	179.869	145.246	207.994	398.767	-102.935	218.328	307.832	223.257
300	-373.087	-282.107	-245.252	-91.0475	-458.077	-262.634	82.8219	-206.013	316.234	215.774	81.7467	199.714	31.0128	-154.253	-388.217	-514.073	-740.993	100.798	-379.708	-331.611	-250.745	-442.83	-170.568	64.0221	-405.889	-220.891	-84.2106	128.875	26.9732	-54.7518	-129.589	-346.112	-265.059	-211.573	-86.3092	-290.602	-284.28	-190.993	-292.807	-347.173	69.2389	-190.575	-192.534	12.2232	-252.248	-310.669	223.449	-207.143	-313.325
305	-42.6155	-239.786	-2.76421	69.3014	-87.1468	-244.773	84.0326	-12.5267	387.763	299.583	190.427	418.355	337.958	97.9039	-185.19	-113.246	-275.564	-183.377	-92.1125	-380.227	-126.103	-89.0251	94.6287	85.7582	-360.899	-173.132	-43.4579	282.989	348.275	227.898	64.4024	-253.687	104.912	-37.6057	116.304	-7.30309	-76.5975	14.2109	-140.238	-229.191	116.12	-24.0347	-74.9595	200.196	223.906	-271.582	18.0509	4.26066	-190.999
310	-277.1	-368.568	-376.749	124.272	-178.26	-476.655	-75.2349	-347.799	231.321	295.638	174.296	284.788	203.452	-225.933	-507.24	-142.331	-486.862	-290.185	-472.479	-327.438	-481.488	-593.218	26.593	-76.5707	-345.777	-340.138	-96.157	204.07	285.363	-41.6271	-275.104	-167.665	74.6393	28.3315	27.5168	-310.686	-38.6145	-338.43	-241.93	-186.823	-187.646	-283.958	-249.104	44.1499	-120.389	-355.318	-55.75	19.6363	-202.997
315	161.181	-21.647	321.627	268.54	-27.2431	-100.702	85.0876	161.843	406.958	157.228	350.6	518.822	399.581	131.826	-178.423	128.849	-209.387	393.682	-124.07	-164.398	142.634	-387.96	123.976	-9.65623	-192.945	-68.6895	-135.205	279.425	194.019	393.315	105.532	-23.4892	-35.0706	237.146	277.777	-17.0557	-42.4463	104.207	-20.9648	63.6775	113.173	87.3597	-32.7604	63.7607	219.421	-50.8541	134.759	92.4595	57.1339
320	-103.741	-353.819	-149.407	230.292	-190.549	-151.335	-128.649	-91.8291	480.622	184.508	379.627	399.496	403.386	-47.9226	-391.279	137.49	-358.409	-228.765	-135.432	-273.362	-153.606	-401.705	20.4394	-98.4984	-408.016	-312.024	117.801	178.546	323.863	94.7879	284.202	-175.569	90.2169	88.6431	117.206	-196.78	-43.6463	-142.082	-133.945	-82.29	-102.416	-306.58	-118.975	45.1695	12.7867	-79.5562	332.575	-105.649	-60.8034
325	17.5236	-457.358	-133.519	577.745	-95.6332	-78.0195	210.909	93.1608	313.555	182.469	17.1056	229.907	232.099	-20.7867	-348.106	-66.5821	-304.197	-108.329	-44.1767	-508.58	-308.938	-412.661	189.402	246.937	-248.698	27.3434	-82.4444	190.937	159.108	-192.139	294.836	-107.573	173.644	143.361	110.839	-18.3946	-45.754	-121.428	-266.644	90.5333	-221.037	-349.907	-252.258	132.108	-123.704	-82.0811	163.375	-38.8397	-96.0161
330	-136.907	-178.562	-89.8819	16.6256	-231.807	-102.843	17.3365	-92.4587	137.506	224.6	104.404	286.169	129.023	-143.797	-379.649	-303.76	-242.287	-239.658	-236.802	-176.589	-140.489	-581.773	-3.35804	137.535	-282.047	-129.817	-68.1438	-81.7111	155.687	-58.1955	-113.042	-88.1073	282.308	2.16329	-155.133	-191.801	-229.851	-120.65	-126.527	-301.758	65.7084	-47.4622	-104.052	166.567	-58.0552	-476.913	12.5134	-46.2078	-191.64
335	79.0183	-245.644	-86.8194	393.292	-186.497	28.8521	206.801	150.159	673.706	176.195	386.46	643.743	335.897	27.1083	-65.9091	278.561	-142.322	-288.594	83.5493	44.8661	-153.136	-390.309	-8.17317	202.537	-64.0042	6.96839	28.2541	177.46	268.116	-73.7727	185.202	173.063	202.392	230.254	258.894	19.316	132.413	121.169	-193.085	-104.268	171.566	2.91226	205.352	295.68	234.842	149.411	8.43981	39.3462	73.6433
340	-146.601	-391.264	-86.2861	89.1438	-512.583	207.282	-10.0566	-42.0282	84.4761	118.021	260.574	228.487	102	-211.427	-308.8	-44.8355	-278.43	-309.421	-116.977	-452.864	-153.077	-284.187	-179.41	55.8963	-311.691	-451.235	78.6827	-25.8143	26.4732	79.9954	14.2228	-181.75	79.3753	-200.963	28.4778	45.8179	-98.3684	-131.54	-369.357	-191.533	8.18463	-135.001	-314.601	145.833	-211.332	-335.972	-197.271	48.6282	-121.213
345	-138.141	-108.392	-230.981	1.38981	-282.391	-107.479	-3.75567	-141.854	21.5835	83.3297	146.339	436.195	227.737	-161.495	-59.4716	-212.406	-150.337	-453.603	-14.0741	-154.493	-210.371	-513.217	119.412	139.645	-361.651	-97.1021	-22.2939	201.687	54.1029	-79.8163	-115.198	-146.073	64.1715	79.2548	281.183	112.904	0.9764	153.443	-12.1435	-90.2534	73.6863	-160.719	1.81924	126.706	-96.9	-89.8984	-105.47	240.127	146.151
350	-198.041	-310.986	1.05556	25.5714	-236.555	-521.325	82.7357	15.5293	279.96	136.176	233.646	455.493	319.804	30.8103	-199.316	-247.381	-485.849	-556.754	-51.9691	-322.051	69.7752	-422.737	-1.45278	79.8741	-269.92	-178.355	63.6113	-11.4012	-130.927	-577.545	74.4357	-108.07	314.79	234.316	99.7589	19.674	-50.6309	40.9583	-10.6961	-11.0639	162.493	0.07316	411.748	17.6377	30.7739	-220.989	136.938	-100.64	-69.7625
355	-187.092	-392.029	-157.756	-80.5536	-99.5269	-52.0259	-235.032	-92.205	173.329	82.4823	194.559	605.342	337.934	-23.0881	-206.789	-69.0598	-417.25	14.062	194.777	-130.423	-95.6577	-310.049	150.885	312.968	-464.822	-274.34	-53.0762	82.6889	29.7238	50.3636	-70.7165	-121.22	274.562	79.3997	144.001	211.323	-15.4203	125.978	-154.2	-150.259	-102.751	300.069	315.795	60.8721	165.357	-85.2012	39.122	100.893	-73.7762
360	-410.252	-419.426	-449.499	17.6904	-163.525	-522.001	-57.4427	-259.669	117.086	2.97766	133.219	300.177	-158.025	-317.01	-484.12	-316.129	-493.227	-257.138	-40.6256	-448.265	-14.4405	-779.545	-230.148	-119.734	-703.684	-85.9745	-345.577	23.5527	-304.615	21.8676	10.8314	-171.521	-174.749	-23.7636	-42.2947	-33.9321	-19.4087	-29.3773	-361.662	-281.568	-87.6633	-120.583	-303.393	-101.542	74.8708	-443.512	104.491	-196.342	-226.6
365	-85.3798	-364.099	-268.335	266.1	-286.947	-177.331	66.3739	-156.214	44.0606	19.9793	266.25	112.973	132.329	-2.69913	-299.81	-62.8321	-399.394	-375.177	86.4406	-149.934	207.972	-739.741	-197.745	-6.25593	-514.895	-398.151	20.5556	203.716	115.991	-75.8213	136.702	-162.145	216.77	11.2604	238.827	154.247	-266.487	-21.3795	-314.254	108.625	15.9785	-446.629	-128.29	103.851	-90.4672	-422.922	158.176	-33.7264	-1.44643
370	-432.828	-266.339	-279.183	-247.565	-227.593	-271.303	41.0267	-237.298	-127.031	-24.4893	152.466	164.691	201.592	-136.212	-457.277	-391.066	-45.6859	-295.274	-35.8304	-307.95	-357.153	-726.483	-124.224	19.6931	-430.004	-351.484	-45.6284	69.0897	-272.916	556.288	-243	-15.6913	43.9097	-54.738	-56.4825	-124.778	-3.76259	119.608	-114.325	-134.825	-2.17484	-171.975	-103.63	-105.802	-98.9634	-456.331	202.034	-138.528	-217.367
375	-276.649	-128.324	-231.666	-101.243	-162.767	-181.507	-258.039	28.303	97.5268	-24.8589	30.7927	257.205	193.8	-18.8768	-272.81	-129.279	-427.444	-268.743	-29.462	-281.199	-425.951	-684.531	-260.785	-27.3863	-326.917	-31.8492	-204.662	193.94	17.1696	-131.862	-425.492	-184.788	116.583	-24.9542	146.675	-109.802	-17.62	157.214	-28.2307	-73.8966	35.2094	-400.675	-230.775	148.856	-88.0544	-416.674	240.6	47.0177	-118.164
380	-149.938	-176.1	-195.127	45.4316	-124.79	-158.081	-76.1947	-25.3448	-150.114	-140.766	15.4476	566.559	394.221	42.5373	-187.149	-422.864	-496.5	-96.2252	72.6673	-315.728	-30.6046	-515.057	203.249	130.396	-163.423	-230.089	-210.097	291.943	-33.8187	-106.26	-97.7976	-238.97	263.883	118.37	105.911	101.209	-27.7172	296.95	103.546	-6.5854	30.272	-237.029	-137.031	24.7121	39.0054	-275.358	67.7432	161.367	-168.812
385	-85.0111	-241.692	-37.876	233.451	-142.072	92.1327	-29.6157	-28.1288	-112.624	-96.3758	211.678	486.807	410.685	-36.8024	-141.958	-132.76	21.8333	-80.6174	-1.74034	-128.679	-82.944	-518.955	-75.1112	109.454	-216.221	-137.62	-100.654	290.932	82.2605	157.99	55.4345	-44.2072	243.613	-59.1499	248.07	-21.2105	-76.7765	207.759	403.189	117.673	11.8046	4.62816	-53.8318	184.644	213.179	-194.804	191.849	18.3078	-14.0556
390	63.2372	-297.864	-261.575	-55.4869	-179.607	-243.517	180.731	-94.2194	-184.916	-207.701	314.148	454.054	149.926	-65.5417	-314.768	-131.629	-501.024	-312.748	57.1216	-187.756	-202.499	-469.982	-156.751	-12.028	-265.729	-277.082	-140.054	-160.751	-146.682	-284.205	9.4246	-286.978	208.248	-110.6	16.1728	12.6196	-46.1109	9.5787	-199.643	-58.8874	20.93	-314.456	-143.421	268.379	-12.5765	-380.8	159.455	-141.059	-241.174
395	-267.314	-370.918	-49.1885	167.372	-123.571	-364.018	-22.1105	-191.401	-192.721	-84.0186	174.214	291.915	206.596	-136.441	80.3863	-78.8835	-486.024	-286.958	177.469	-464.417	13.2812	-702.395	-55.1616	-115.012	-256.367	-385.451	-102.101	197.707	237.647	-577.572	209.765	-139.411	252.148	-25.8414	-67.9471	-157.249	-187.126	-100.334	-113.101	-21.0538	-127.159	-231.966	-282.078	-44.1684	-151.516	-276.454	178.843	38.4913	-255.838
400	36.4682	-78.5272	-177.567	193.165	-680.231	-78.5862	-149.848	-250.317	-180.513	-566.26	216.902	270.063	179.566	-180.082	-73.343	-182.485	-532.813	-229.016	-159.148	-315.258	-85.1983	-831.305	16.3584	-16.7793	-415.912	-192.908	-151.394	154.703	307.168	-3.83712	-349.003	-148.541	-19.9104	-185.759	0.2733	-172.268	76.6823	-45.1519	-189.633	-239.083	-212.648	-494.909	-8.43076	155.266	70.5855	-199.754	455.79	5.37645	-126.719
[truncated: 54 more columns]

## Sheet: WT_Stat phase_1
Time (s)	1 bg subtracted unnormed	2 bg subtracted unnormed	3 bg subtracted unnormed	4 bg subtracted unnormed	5 bg subtracted unnormed	6 bg subtracted unnormed	7 bg subtracted unnormed	8 bg subtracted unnormed	9 bg subtracted unnormed	10 bg subtracted unnormed	11 bg subtracted unnormed	12 bg subtracted unnormed	13 bg subtracted unnormed	14 bg subtracted unnormed	15 bg subtracted unnormed	16 bg subtracted unnormed	17 bg subtracted unnormed	18 bg subtracted unnormed	19 bg subtracted unnormed	20 bg subtracted unnormed	21 bg subtracted unnormed	22 bg subtracted unnormed	23 bg subtracted unnormed	24 bg subtracted unnormed	25 bg subtracted unnormed	26 bg subtracted unnormed	27 bg subtracted unnormed	28 bg subtracted unnormed	29 bg subtracted unnormed	30 bg subtracted unnormed	31 bg subtracted unnormed	32 bg subtracted unnormed	33 bg subtracted unnormed	34 bg subtracted unnormed	35 bg subtracted unnormed	36 bg subtracted unnormed	37 bg subtracted unnormed	38 bg subtracted unnormed	39 bg subtracted unnormed	40 bg subtracted unnormed	41 bg subtracted unnormed	42 bg subtracted unnormed	43 bg subtracted unnormed	44 bg subtracted unnormed	45 bg subtracted unnormed	46 bg subtracted unnormed	47 bg subtracted unnormed	48 bg subtracted unnormed	49 bg subtracted unnormed
0	0	0	0	0	0	0	0	0	0	0	0	0	0	0	0	0	0	0	0	0	0	0	0	0	0	0	0	0	0	0	0	0	0	0	0	0	0	0	0	0	0	0	0	0	0	0	0	0	0
5	64.1238	-626.242	-593.222	-42.1253	-227.097	-248.81	27.4906	11.0524	-173.499	23.9607	-63.3997	-324.865	8.09407	-107.933	436.285	-186.274	-76.9375	-237.42	-165.339	-372.466	-373.929	-200.97	-216	-146.103	-269.207	-30.0729	-76.2536	-76.3354	-445.233	-533.968	-350.004	-185.567	-67.2803	109.378	-129.679	-287.305	-328.074	-130.194	-105.76	126.401	-124.661	32.8471	253.091	-43.0962	322.081	-119.927	-315.205	-101.029	47.6381
10	142.494	-272.861	-357.987	-164.76	-79.6412	-158.713	-153.021	1.61979	-7.97812	-9.29429	-27.853	-40.1144	361.009	9.50535	214.589	-350.069	37.4418	173.369	126.886	-310.677	-416.596	-73.8156	-226.268	-119.63	-131.484	159.186	80.3538	62.0414	-321.886	-255.253	-244.76	238.054	-63.1266	135.737	81.7137	41.8518	-194.72	-66.7411	-178.209	181.471	301.871	133.81	118.215	37.6933	290.284	-29.3203	-260.555	-121.46	-69.4733
15	269.019	-319.486	-296.211	165.517	153.758	42.7381	221.147	-14.8681	-142.493	296.021	18.053	-286.27	440.536	183.513	427.615	133.862	198.151	272.175	307.314	-69.992	248.029	-31.1842	15.8864	202.441	-140.808	584.967	155.93	-67.8971	-300.392	-402.826	248.41	-34.6165	167.307	169.984	526.343	94.2915	46.5862	122.787	145.306	461.54	58.5021	440.085	442.134	-168.791	331.221	297.828	-10.8099	-3.51255	-197.766
20	197.735	-121.699	-72.5409	25.4231	85.0534	248.829	41.4306	148.66	121.238	211.637	304.853	61.6076	712.737	446.247	814.138	212.203	181.963	436.929	251.686	-246.291	468.26	84.5563	0.5	181.638	90.178	-147.829	115.45	253.429	97.9059	-302.635	-50.5602	222.267	6.07103	306.259	135.606	520.384	-380.711	165.739	42.7302	594.381	374.535	341.337	319.476	166.748	401.845	174.67	-174.23	43.838	-157.543
25	552.611	293.329	70.3846	96.0844	279.337	539.893	432.166	-78.1615	424.988	476.707	304.879	98.9148	969.512	477.79	1180.87	535.282	393.02	628.583	460.353	325.651	222.686	401.116	404.532	410.437	171.691	118.047	188.844	272.765	241.255	-255.658	426.637	140.45	184.707	466.385	619.465	581.261	-22.3621	282.775	239.166	451.085	293.084	649.654	619.5	-0.33365	504.457	300.373	161.064	158.364	47.1153
30	350.159	-168.709	-199.57	70.9731	66.875	-32.2578	176.318	-78.9564	-74.4432	321.186	144.632	-200.169	677.393	289.696	693.974	138.959	25.5558	285.972	703.843	-123.132	-75.7206	32.7223	-331.662	121.842	-234.437	175.14	96.6038	-58.5083	9.17445	-408.55	-140.003	-107.973	-110.67	57.4326	187.338	336.709	-264.232	9.44464	-74.3054	183.759	0.10781	112.626	429.125	-112.526	336.377	110.044	-336.679	81.0904	6.99226
35	519.403	-15.295	225.598	19.5564	127.324	182.209	217.739	96.4857	225.199	422.178	231.403	-45.6477	1015.35	663.378	918.242	378.12	292.203	822.673	471.716	288.182	-150.328	35.114	-3.95238	255.347	168.883	220.075	278.304	41.254	88.6744	-107.65	621.294	162.135	252.265	208.565	789.2	415.064	124.178	7.9375	118.843	534.801	453.597	392.983	285.404	62.2173	487.108	396.851	-10.9789	37.8665	-47.6827
40	265.403	-406.604	-189.29	-516.26	113.034	-80.1786	-91.7707	-198.329	-35.4876	195.222	34.3634	-63.125	312.931	-66.0092	766.96	191.735	-149.021	384.454	-58.3275	-217.696	249.396	-198.969	-723.665	-58.7436	-503.625	-12.5277	36.0538	-170.956	-605.296	-714.96	72.3165	-210.164	-280.473	-163.708	63.3838	-94.3598	-224.216	-437.549	-152.59	206.211	178.768	16.0043	22.8693	-251.314	264.636	57.3744	-534.806	-244.411	-208.306
45	106.854	-311.813	-254.111	128.019	-210.365	44.1085	95.3941	-180.047	-77.0769	131.497	-147.116	11.4718	891.892	360.724	618.413	232.713	-221.234	266.673	298.286	-416.286	57.1857	-269.433	-438.295	-17.8658	-521.897	-168.22	-113.021	37.2886	-525.858	-466.515	-67.0496	-184.773	-154.393	-170.096	36.3375	121.959	-206.087	-211.312	-181.937	49.8059	351.508	-45.999	222.873	-156.035	173.483	50.698	-485.071	-118.85	62.3929
50	-439.123	-621.799	-554.411	-255.728	-243.265	-323.712	-162.866	-161.525	-264.883	56.5657	-303.913	-209.988	395.213	214.881	198.642	-40.7489	-162.683	109.456	-352.697	-354.045	-472.147	-239.023	-492.585	-334.327	-792.953	-424.22	-155.263	-251.303	-808.178	-685	-209.875	-398.627	-544.791	-184.865	-152.991	-249.543	-507.733	-239.969	-684.276	-45.9171	-67.9093	-396.67	200.7	-417.19	85.7177	-17.0423	-822.347	-355.11	-184.393
55	-126.267	-398.66	-378.175	-180.625	-53.6542	-154.514	-15.009	26.5899	-79.499	268.716	-30.0982	-127.994	752.423	211.388	426.825	422.654	35.687	529.271	72.6837	-302.79	-59.0817	-85.1442	-533.568	-9.6921	-240.358	-10.6291	36.4931	-319.368	-501.758	-682.369	202.468	-332.969	210.033	-336.096	144.583	49.3764	-37.122	-241.858	-281.742	193.554	70.5456	108.531	438.21	-374.289	501.769	194.524	-680.458	57.8402	-234.505
60	-344.602	-501.541	-642.722	-9.34081	-73.581	-218.186	-414.669	-221.074	-131.292	245.852	-197.636	-281.788	448.171	256.729	276.592	384.79	30.1225	542.835	-177.929	-289.018	-115.693	25.083	-737.405	-147.785	-410.42	186.876	-35.3295	-168.045	-729.499	-479.669	-50.1129	-224.987	-215.77	-326.986	227.183	-225.541	-516.621	-134.965	-494.593	339.33	101.863	-102.674	229.096	-162.36	258.635	144.599	-701.806	-204.911	-224.749
65	-56.1176	-275.753	-295.118	-7.96978	-22.6625	51.25	203.369	-75.6383	187.708	292.604	63.1031	-125.334	801.171	541.138	603.072	693.119	27.9418	724.581	280.508	-0.53538	167.092	-183.884	-631.809	255.192	-421.623	103.984	59.7289	98.1011	-290.557	-181.757	377.904	-107.488	-6.78632	-47.3456	180.851	-2.20374	-348.011	-210.095	174.414	409.454	308.306	-67.9569	309.769	-91.8096	293.368	338.508	-483.7	-14.492	-73.7137
70	-24.0706	-480.403	-235.04	-5.05968	90.9408	-123.069	-190.892	-116.465	96.3475	197.336	83.0589	15.4405	714.41	559.199	419.417	719.938	124.988	389.81	184.222	170.606	321.229	156.431	-407.559	224.172	-305.843	-98.3354	122.11	30.8667	-181.606	-236.373	314.101	29.6152	50.7888	-142.906	242.567	144.817	-314.329	17.3497	264.318	352.111	418.371	52.0722	-120.226	-16.8178	433.845	226.562	-389.629	308.583	10.0048
75	62.3461	-725.702	-680.722	-129.916	-73.7375	-287.723	-380.995	24.3147	144.802	216.151	-81.3978	-255.795	512.467	245.222	253.11	300.002	-65.8974	255.241	-413.506	-517.09	-263.408	-188.071	-942.271	-76.9973	-342.337	-289.248	-61.7592	-204.551	-671.99	-551.869	-1.92712	-146.369	-189.495	-462.453	-242.52	-157.719	-446.869	-301.465	-128.381	309.303	-182.49	-51.8742	-74.3578	-395.411	278.451	-85.5089	-864.363	-184.621	-120.339
80	260.458	-69.4865	-159.784	63.6887	300.19	109.995	308.169	2.50957	261.969	-8.34762	-99.4125	-70.7328	947.57	798.761	414.365	808.535	362.286	998.941	288.456	6.47388	94.4982	-23.202	-174.485	313.069	-222.678	140.434	-100.949	-41.7919	-402.252	-190.117	232.623	158.857	489.214	-105.632	304.762	284.195	-59.4177	89.1605	253.427	575.727	629.773	352.142	286.89	14.7715	590.091	334.103	-272.957	260.352	-147.398
85	259.559	-294.6	-173.586	-352.799	60.1443	-130.578	-84.0875	91.2512	32.3595	509.012	95.0728	6.47727	647.302	577.272	564.52	833.366	386.817	519.7	168.503	-214.834	449.729	259.546	-343.738	302.241	335.767	281.876	128.234	33.1792	-458.961	-148.567	310.288	143.884	97.0049	-7.36591	304.501	324.482	-368.17	109.098	323.728	455.374	562.822	44.8276	338.594	-59.8326	459.199	570.388	-480.094	245.784	-167.915
90	247.734	-210.678	-177.993	-110.994	171.781	190.061	80.1735	218.545	70.2836	371.794	86.6026	157.607	949.488	564.115	633.029	931.609	296.578	855.747	225.408	-88.1308	4.12941	78.1887	-115.716	313.321	176.931	338.199	146.134	105.314	-346.31	-515.337	249.184	-71.4121	161.728	101.176	419.164	84.8764	-111.776	86.1199	467.346	557.682	294.822	53.5505	366.957	-89.2655	570.266	403.941	-543.445	346.372	-37.4092
95	406.921	-99.7592	-282.767	36.7334	248.93	257.345	-123.372	94.2351	140.109	238.186	68.6533	36.1078	1083.17	867.003	554.585	1195.07	438.388	944.085	368.484	324.798	173.958	430.235	-122.363	406.424	207.124	-8.23786	160.509	-38.3031	-89.1247	-182.289	424.428	413.545	283.868	-27.5621	491.566	329.391	-245.228	-96.4514	537.022	561.076	560.403	148.989	388.462	245.378	587.54	566.83	-247.189	281.787	-96.5508
100	487.235	-254.653	-423.972	72.6268	204.846	354.768	-0.36154	94.8832	229.038	472.225	188.235	170.136	856.119	565.314	749.056	939.952	219.701	713.353	376.169	-19.6567	81.2437	340.67	-121.007	420.019	155.333	256.155	398.029	-23.3677	-568.254	-101.386	400.762	-8.94549	211.373	53.7631	361.059	340.824	34.1062	-58.8713	459.053	682.227	461.289	74.7844	424	27.712	641.784	360.276	-608.144	399.123	-135.637
105	487.466	-20.5562	194.694	21.2231	209.713	-85.2127	212.158	234.498	193.587	178.56	494.071	250.763	1027.27	795.194	298.192	1029.47	491.349	1251.03	480.003	579.385	128.5	693.493	-132.117	707.37	504.738	331.22	578.682	295.587	-327.044	93.0687	525.392	6.83255	389.598	251.326	759.737	677.426	153.671	90.2821	700.593	665.407	518.051	303.375	477.966	296.848	1077.38	628.362	-227.468	177.867	72.6298
110	285.828	-383.523	-507.142	-96.1082	66.335	156.381	-100.224	174.119	197.249	155.175	-265.613	-138.996	665.345	447.431	685.862	813.674	316.107	497.348	227.619	-51.7196	-310.118	312.232	-497.356	110.05	-198.617	343.752	-55.2569	-121.534	-794.338	-405.32	83.2593	-113.268	216.173	-218.598	343.876	136.643	-376.045	-272.266	394.382	232.332	251.847	-261.901	161.714	-173.907	341.463	395.499	-664.312	113.33	-436.19
115	177.363	29.7571	-327.52	-56.9341	31.2125	-14.7934	-28.0912	39.8278	467.332	110.586	228.605	20.9501	765.807	501.948	618.433	1127.92	323.644	879.505	345.69	-68.3571	111.217	63.8637	-568.347	326.036	-122.908	193.328	159.617	115.632	-702.049	-263.168	304.207	-418.305	76.4965	-172.041	323.09	233.039	-340.323	-183.005	466.397	508.041	390.401	149.033	202.023	29.8788	529.627	446.076	-643.648	144.441	50.5073
120	9.45534	-102.935	-250.246	-144.319	36.5495	-150.326	-246.553	35.2957	-49.4581	323.625	-86.1458	-24.4477	887.866	488.346	474.45	1040.85	356.726	347.074	225.664	-159.01	295.971	5.89701	-414.315	411.61	-114.891	22.4675	-30.3198	-131.764	-436.106	-274.489	185.621	-323.401	150.136	-126.747	391.305	143.219	-100.05	-112.592	173.025	356.777	264.387	166.22	389.236	167.609	376.971	595.688	-579.978	111.833	-207.793
125	-215.953	-412.736	-575.289	-391.058	-145.048	-130.787	108.55	-123.048	113.067	39.4879	-371.88	110.019	745.141	267.464	79.0009	646.985	-17.2629	75.5813	-149.814	-273.57	-45.4118	-92.5795	-669.645	219.935	-312.269	-17.495	-16.3323	-84.251	-744.53	-480.4	89.8561	-221.948	41.6703	-405.417	218.963	-49.7906	-287.297	-215.312	327.5	125.878	-10.654	-195.456	2.75083	-301.443	274.644	269.583	-587.312	82.436	-203.473
130	288.014	-62.6707	-66.8	112.223	584.969	212.663	182.367	408.832	16.824	586.602	194.545	-1.47064	1052.2	980.691	1024.64	1129.44	528.895	800.087	337.06	409.773	101.876	529.928	-183.18	383.227	28.408	557.048	321.138	334.662	-573.086	27.8258	188.03	54.9788	365.686	167.51	592.457	702.899	-65.168	37.4653	839.773	424.265	522.428	190.747	462.245	1.44454	968.609	635.885	-357.114	342.042	123.405
135	475.514	-175.934	-224.635	-91.4162	175.622	78.3492	-72.5983	135.72	281.078	261.809	120.694	394.788	925.541	631.395	703.101	1294.53	651.298	843.607	704.408	392.105	255.471	276.666	-257.328	651.922	-154.876	204.299	282.048	175.39	-726.304	151.308	610.883	343.029	241.148	-98.4434	366.462	314.169	7.66322	201.364	838.538	770.078	511.288	225.572	680.862	153.803	879.729	546.465	9.71739	343.448	-212.065
140	183.575	41.5904	-194.431	244.975	422.149	235.338	61.3296	253.404	-25.6346	428.641	67.8778	316.636	864.001	753.554	681.503	1202.27	543.84	958.643	656.399	513.429	-150.559	287.956	-167.826	539.727	-156.694	277.03	278.411	30.9323	-653.673	-30.9769	577.352	31.1667	85.1282	88.3438	544.476	267.451	-69.7909	173.3	762.154	490.164	768.136	513.065	354.941	312.449	875.09	644.449	-208.594	354.48	-105.617
145	-222.289	-250.927	-336.294	-94.6103	-182.436	-132.306	-215.525	126.16	-6.26068	291.48	-427.209	-322.282	774.43	553.846	256.602	747.233	315.26	541.614	310.443	-94.4006	-254.571	71.5072	-509.332	126.052	-597.131	160.889	146.654	-4.97059	-921.963	-361.1	-18.4967	51.5446	64.4947	-162.495	286.446	146.679	-243.867	-3.89145	382.743	299.986	199.665	-171.567	165.441	78.265	535.752	397.024	-340.464	364.615	-235.788
150	107.024	-625.182	-754.189	-279.777	-221.309	-181.816	-405.65	49.7292	-228.458	289.786	-130.183	-66.8977	139.821	158.277	109.085	736.127	214.131	336.025	-89.6143	-295.483	-421.748	26.0642	-675.755	-193.266	-777.443	105.86	112.137	-369.582	-896.148	-420.419	-111.285	-489.786	-183.103	-270.724	11.8822	-104.84	-295.553	-426.554	88.5862	-174.09	-0.73773	-357.245	-30.9064	-59.4002	364.484	397.017	-653.563	-198.053	-70.3045
155	363.454	-324.179	-372.178	-55.5385	-81.2193	-124.136	10.0833	129.38	-30.606	200.445	-168.729	39.3939	656.563	743.98	183.918	955.037	434.768	619.151	354.693	-93.1633	-135.561	164.289	-493.589	179.777	-554.083	257.3	120.718	-265.885	-709.915	-234.007	-197.067	-302.976	179.436	-84.8265	259.8	90.3865	-211.764	84.3845	422.997	324.781	237.936	-101.567	468.087	-40.3575	401.655	444.703	-333.65	21.9905	-232.548
160	236.045	-140.84	-357.406	36.0283	118.995	84.2014	62.47	359.523	511.682	514.441	22.525	-44.2222	949.223	610.99	544.289	1008.42	535.34	697.127	392.175	206.039	-131.314	485.654	-306.742	336.572	-400.368	-83.6973	239.809	47.1792	-486.645	-418.384	114.034	25.2381	161.85	-138.697	379.97	437.224	-125.003	-42.0362	538.16	546.26	527.677	81.7578	278.869	309.367	769.252	684.671	-268.713	642.454	-9.08304
165	382.614	-243.149	-492.211	177.756	202.671	-28.6518	-87.83	222.089	236.001	341.733	-95.3708	107.211	1164.58	545.966	810.656	1115.02	500.84	811.41	293.898	129.066	114.398	401.42	-127.425	265.665	-513.464	459.78	188.779	-54.7767	-410.678	-172.072	248.408	-241.788	298.22	-103.628	376.661	370.101	-263.995	-45.7708	443.401	607.114	483.048	274.343	214.155	195.333	651.645	549.966	-316.978	300.336	-57.644
170	118.044	-201.568	-257.078	260.439	211.852	85.4301	113.225	289.266	355.859	352.27	-86.2368	253.052	1287.34	599.335	436.843	1114.09	441.934	656.48	421.207	41.0281	291.752	496.175	-12.6484	306.509	-478.357	178.738	295.567	188.665	-442.633	-364.489	175.966	96.3764	140.252	-99.5928	333.286	477.005	-35.3118	166.104	625.845	316.58	426.051	229.441	311.524	177.758	612.816	652.903	-78.2279	160.788	143.454
175	-4.6869	-269.236	-331.526	101.741	86.0569	111.479	45.937	341.504	403.001	609.427	230.838	98.2196	850.273	655.801	369.374	1033.62	402.644	456.33	298.02	48.3501	498.738	130.797	-435.309	324.808	-335.74	252.712	268.937	-166.707	-310.072	-202.983	-5.82067	-44.0345	150.848	-90.9806	347.391	463.211	-121.845	113.951	304.38	341.031	373.848	319.141	47.6052	82.1743	760.163	387.105	-359.338	190.099	17.5548
180	46.5565	-298.697	-399.611	-4.45192	86.9253	117.849	114.143	276.576	448.531	442.237	-61.7181	376.263	964.53	801.579	731.804	1149.01	478.388	745.119	507.381	279.292	375.484	292.116	-72.4783	243.147	-537.361	174.497	51.378	77.6792	-281.693	-52.3808	157.741	-249.628	199.403	155.721	466.05	401.723	46.323	97.8732	477.507	445.605	612.777	226.6	180.274	311.202	742.942	608.345	-337.477	352.85	-295.99
185	395.159	-248.021	-57.7809	40.6418	292.701	136.193	85.6	257.947	655.198	393.182	59.4777	469.467	1305.49	807.426	768.043	1275.39	746.126	857.577	676.556	380.083	348.029	609.636	18.3786	701.22	-259.773	198.538	238.493	103.882	-22.1711	196.489	599.941	-166.627	534.7	361.268	815.445	731.762	-107.8	170.451	553.153	507.292	537.302	348.378	479.458	199.808	879.384	968.027	-273.485	527.518	80.9689
190	410.696	-258.413	32.5139	396.58	156.171	303.802	-11.2667	271.917	443.177	478.567	280.24	292.842	1147.6	760.749	606.718	1082.52	810.911	681.591	535.504	267.937	-91.5294	362.305	-8.12319	496.727	-209.183	476.713	93.878	135.147	-81.3786	-187.703	402.044	215.628	480.047	-123.54	551.321	612.275	-435.303	284.408	484.093	603.394	466.209	321.016	426.712	184.916	779.056	892.2	-106.223	550.37	47.1615
195	601.893	-102.108	-13.0736	102.393	290.442	171.662	365.19	-96.5753	418.725	489.995	95.5875	519.436	1162.45	822.237	1178.76	1157.3	669.711	940.451	483.314	734.024	322.229	477.341	77.7016	344.09	-205.502	253.588	449.135	197.164	-95.693	-218.072	372.934	84.8894	366.051	285.5	685.724	732.078	276.534	184.282	477.014	792.031	863.256	155.466	471.301	303.733	1039.76	1213.87	39.754	496.206	97.3214
200	497.44	-51.4284	-15.4916	-34.6769	518.379	271.502	275.202	122.418	434.49	613.067	105.895	496.146	1272.77	736.816	1122.07	1141.03	850.777	637.003	603.59	344.975	263.848	442.754	139.902	530.165	6.95072	591.28	318.154	54.799	-44.9098	141.529	352.649	-53.0622	383.048	153.209	778.343	1006.54	173.788	210.917	985.702	880.282	869.935	469.774	717.214	183.096	862.471	1263.89	-86.3906	652.927	257.705
205	616.683	-93.2841	-191.416	166.13	272.772	344.993	-30.2571	350.59	263.439	766.016	248.921	268.312	1122.8	582.057	635.164	1342.84	952.711	632.268	655.452	626.164	165.229	408.338	-153.697	643.941	160.077	346.97	261.816	251.574	22.3032	-63.5129	553.057	325.76	742.595	352.787	684.688	740.919	21.356	233.43	627.979	681.458	721.306	348.142	528.444	381.122	1008.09	1198.93	-137.944	420.555	228.917
210	329.946	-211.742	-171.272	130.531	308.462	204.821	102.562	323.361	420.61	447.693	-57.952	482.394	1335.57	589.162	620.24	1248.73	748.951	660.414	796.02	499.514	205.108	576.482	-74.4178	418.06	-18.257	542.086	257.315	322.826	-16.9556	-380.759	418.377	332.328	633.88	50.6049	854.803	733.838	-20.1034	155.598	742.61	731.243	529.824	566.535	447.637	272.082	969.901	1004.52	-65.5156	598.432	195.725
215	95.958	-384.861	-203.514	-112.964	324.702	-171.037	-105.007	202.259	361.384	429.036	-227.55	286.862	718.875	351.549	726.213	955.965	742.771	522.914	228.492	123.978	196.765	175.773	61.9394	256.706	-281.37	263.092	44.4501	25.5735	-351.039	-321.853	-68.5532	-192.343	173.831	-15.4688	451.347	446.143	85.2201	-156.412	591.735	364.866	319.387	23.9837	196.223	47.144	558.784	802.888	-315.69	346.61	83.9298
220	-127.304	-368.595	-382.02	-150.444	-227.183	-286.16	-266.419	211.653	136.116	459.85	-74.2696	-68.0019	699.805	132.065	834.422	654.091	551.098	682.922	-4.5084	-189.133	105.582	126.541	-89.7619	162.959	-692.237	92.8445	-199.053	-260.024	-590.775	-193.347	25.16	-39.689	217.075	-189.202	290.866	290.299	-294.173	-122.183	265.985	32.5702	175.871	-18.5151	440.707	26.5322	539.171	434.061	-480.574	381.58	-216.638
225	-135.435	-524.407	-603.967	-183.127	-134.323	-278.429	-220.1	-197.927	276.712	152.247	-129.979	-54.679	676.205	122.25	334.255	703.244	344.479	318.83	120.46	-286.218	-268.278	-75.2334	-327.762	-314.236	-780.375	-129.254	-155.685	-332.483	-837.972	-544.917	-83.1643	-139.272	-44.1082	-251.731	11.6454	223.564	-221.757	-39.4792	113.904	-145.023	-128.97	-374.228	-176.519	-140.029	187.267	275.839	-607.307	311.535	-388.217
230	345.294	-293.308	-114.961	-24.5618	-28.3939	-74.4574	-73.525	159.665	293.882	507.669	60.7542	411.832	1021	660.206	716.715	856.158	793.416	574.08	318.971	97.9554	317.765	408.353	-220.107	252.559	-192.914	167.155	-1.17949	-35.301	-579.113	-204.728	274.077	141.54	149.586	-42.9021	563.029	203.216	-148.261	-31.0184	354.993	442.182	353.334	129.063	326.591	262.011	535.195	547.016	-408.564	458.174	-29.0568
235	261.603	45.3623	-60.6598	28.7668	349.771	48.2946	249.609	161.225	424.993	705.748	173.688	531.977	1125.09	921.549	864.827	1055.53	912.78	824.393	344.112	221.444	208.479	663.254	-458.005	567.614	-2.82312	315.974	152.271	61.6636	-460.212	-335.4	540.911	186.611	291.098	109.437	769.185	559.372	295.176	278.53	711.904	479.996	704.225	148.618	394.262	438.26	986.577	932.774	-367.167	367.6	140.247
240	287.56	-221.568	-325.516	76.9525	241.306	211.306	192.259	73.7405	360.03	320.248	-89.6817	459.332	1102.81	606.494	1039.74	1092.44	1116.9	590.107	397.889	457.884	-200.415	404.475	55.2426	392.784	-34.9986	552.613	88.1216	157.132	-332.398	-137.848	278.913	45.4929	314.394	51.7434	721.846	442.405	-5.29789	150.276	792.434	317.172	349.065	194.719	222.289	22.2788	934.377	669.706	-435.155	594.537	-46.925
245	134.41	-265.812	-181.501	-82.2251	88.9465	-150.419	94.7293	0.90104	243.024	268.657	84.6178	224.492	868.984	93.5923	807.311	845.036	792.946	445.822	171.208	-138.59	174.418	346.071	-378.633	120.718	-104.312	388.088	202.957	-100.751	-655.897	-294.458	74.2237	-140.61	302.583	-168.522	497.225	409.221	111.16	36.4133	418.949	160.239	175.964	119.652	81.9484	85.4138	526.981	480.155	-474.59	334.728	-58.9589
250	267.403	-137.566	-241.525	-38.4912	93.7125	89.9937	166.504	317.913	227.64	363.35	309.145	275.352	983.101	652.613	671.849	1027.42	794.399	665.612	-212.214	136.184	-127.564	402.312	-31.8226	275.526	-276.79	146.212	32.6122	-68.8828	-440.831	-154.469	-222.341	-69.6429	238.811	63.015	406.837	578.963	-75.9828	-55.7599	546.111	49.7597	466.826	106.942	197.397	86.1419	577.635	616.277	-618.362	491.161	-101.893
255	240.746	-139.196	-209.365	11.4588	123.259	40.8083	358.989	442.976	216.917	463.453	161.58	253.922	1331.51	992.173	1080.8	1177.25	960.256	1116.41	348.424	714.198	15.7378	616.048	-303.525	445.593	131.24	47.9859	286.057	72.3824	-51.1202	-173.943	381.164	161.619	596.993	-16.4765	694.562	893.158	79.1914	411.012	828.591	601.607	489.871	229.224	533.597	403.719	821.406	732.824	-419.138	621.951	103.716
260	261.164	-50.042	-345.746	-216.483	95.4347	-4.34367	-144.438	253.543	445.703	358.186	-146.588	289.833	881.433	524.656	924.507	890.433	654.301	1048.94	330.38	-168.975	-86.266	414.876	-90.2239	250.32	-439.333	175.796	515.804	-51.4889	-281.3	-207.759	207.191	-156.698	195.782	-65.1771	359.466	522.844	-169.84	94.6723	498.34	224.031	317.586	178.153	398.284	24.4038	946.216	543.62	-875.257	378.261	96.4048
265	300.696	-143.772	-28.0361	338.762	306.435	-16.4036	-23.1283	260.442	302.702	42.6084	-174.037	344.322	841.667	681.355	1019.25	1172.75	909.356	749.846	199.133	-87.5821	59.5794	514.352	-291.177	237.748	-272.305	325.223	126.138	-157.101	-415.998	-31.81	122.789	139.401	5.47537	186.71	223.109	577.259	69.883	-66.1181	607.238	131.486	267.14	51.9328	89.0643	49.5322	686.555	705.652	-697.776	545.507	6.32784
270	341.208	-235.111	153.161	121.862	295.778	151.196	-139.99	127.918	572.11	348.252	130.442	172.331	1200.63	850.181	919.486	1151.23	1031	756.331	500.584	279.833	381.319	486.55	148.549	569.296	-157.212	351.368	364.057	-37.658	-355.998	-166.871	345.236	122.949	191.855	201.198	475.556	701.914	-74.4111	194.887	700.013	453.273	569.921	64.2393	323.982	365.297	776.137	893.439	-559.529	737.004	120.418
275	-28.5966	-264.939	-363.065	-167.531	130.141	96.5958	-334.496	159.648	110.218	195.381	-33.2696	296.759	850.14	526.189	1071.72	1185.41	786.704	726.548	402.101	-232.955	212.829	357.315	-222.102	145.977	-265.925	381.263	141.713	-81.9446	-641.623	-322	206.605	165.659	302.864	-103.647	503.351	538.838	-26.4982	212.01	508.36	591.636	380.054	319.174	283.708	-122.128	678.252	612.599	-576.463	591.671	154.238
280	224.565	7.39988	-206.444	122.832	156.474	-25.9542	-229.346	333.816	120.899	34.919	26.0651	409.526	675.623	540.336	929.051	1009.23	756.34	713.029	359.83	33.7963	168.876	346.682	-366.974	321.667	-288.342	389.432	100.454	-167.577	-541.37	-171.079	171.082	129.436	134.897	-1.57708	308.874	497.359	159.573	43.2304	412.297	182.831	367.824	324.359	146.855	28.4872	714.359	826.37	-782.08	577.018	27.5877
285	122.479	-339.331	-105.49	-181.077	143.746	92.2626	-314.9	109.001	839.302	323.52	223.456	125.552	962.27	453.01	1068.88	1229.04	740.661	788.275	306.415	-81.6146	338.147	585.364	-118.35	290.461	-47.1585	194.794	221.102	88.5678	-589.011	-134.173	546.956	343.585	334.372	-144.188	608.76	471.601	88.3478	72.5486	703.866	559.869	519.005	446.228	445.249	262.859	747.521	743.991	-499.044	373.232	-54.9881
290	31.6496	108.289	63.8014	230.314	207.057	76.1444	76.1565	196.472	105.069	155.189	276.376	593.932	944.802	806.7	892.609	1138.58	1277.96	868.192	526.686	121.061	196.479	588.888	-394.375	376.028	5.39303	352.433	187.095	-238.464	-604.058	-169.614	516.555	213.651	416.612	138.107	522.294	781.609	74.8662	154.955	874.084	665.385	559.566	606.957	612.821	141.532	827.644	647.163	-416.313	576.683	66.9304
295	444.964	-296.22	-63.1014	95.6806	137.624	91.6993	-59.25	-36.6958	420.439	-67.8032	228.812	467.792	896.598	454.666	742.075	1095.7	1021.59	474.991	364.049	34.6816	-19.4984	697.316	39.45	429.352	-117.64	-75.2914	330.938	-326.908	-460.982	-253.445	450.203	130.94	247.552	-44.591	732.505	631.036	211.455	170.875	789.493	549.276	686.514	593.808	516.012	157.086	700.009	506.562	-282.603	688.868	83.5673
300	507.167	-137.498	-210.325	322.442	377.201	60.6179	-33.075	113.685	273.462	-103.861	49.3443	608.505	942.371	472.842	977.438	1102.78	1096.58	604.996	118.858	0.59172	27.9544	574.06	-167.866	372.51	-251.874	353.254	297.154	-120.601	-643.38	-21.8615	420.69	126.663	353.089	130.644	665.452	846.612	323.039	125.535	703.017	476.212	594.199	471.236	323.436	143.43	579.185	481.007	-342.346	615.148	272.649
305	303.529	3.5896	110.657	299.81	189.689	22.8839	101.142	135.183	98.9365	26.2732	129.493	403.303	1299.31	392.03	468.748	980.421	1207.11	697.779	446.478	114.649	41.914	546.514	-307.5	404.248	-268.712	97.3185	176.221	-121.464	-454.75	-273.335	351.754	35.4527	37.6596	70.111	643.224	757.311	82.7108	-70.4375	661.702	474.926	796.958	215.816	290.158	76.7983	683.316	712.622	-361.152	505.343	12.4548
310	207.659	-172.954	-43.1646	-121.983	91.6168	128.29	147.731	162.336	330.212	237.077	70.5362	591.052	805.09	315.469	859.455	1033.63	1296.34	887.964	139.526	66.3171	16.5016	426.373	199.993	425.526	-49.6135	110.416	297.927	-121.916	-608.357	-35.6297	94.6598	384.021	369.64	109.557	766.872	747.166	33.4521	309.159	621.976	639.789	819.117	376.867	483.331	357.687	709.214	647.303	-594.015	367.704	148.7
315	489.363	-377.872	-190.64	-213.968	261.776	-109.2	45.4478	11.2292	147.134	217.969	163.411	389.79	805.811	198.932	628.309	1075.08	1341.02	811.285	305.559	92.2679	508.168	289.493	-66.4638	441.187	-282.231	224.324	186.309	-87.5343	-827.792	-191.385	54.9678	-88.1663	405.662	113.85	568.737	740.004	128.667	27.8542	563.918	639.538	928.476	432.669	549.551	316.266	882.29	392.644	-442.659	426.049	123.93
320	208.957	-162.903	-483.699	140.407	39.2976	11.8514	-379.628	116.223	30.2885	335.716	135.128	338.824	1044.54	687.878	585.288	987.282	1222.83	867.834	287.833	305.321	112.635	449.782	29.5075	367.639	-394.208	196.715	34.258	-194.593	-543.868	-126.561	461.595	-47.6071	239.215	-178.009	467.863	583.495	-67.7505	30.2463	563.191	593.334	594.502	527.081	380.642	22.6413	863.146	371.598	-389.879	503.923	97.1974
325	619.525	-178.444	-408.162	23.2897	151.334	111.841	-170.671	14.4571	280.343	405.201	330.06	450.664	765.659	363.062	864.517	1002.62	1067.73	888.41	349.374	52.9451	41.4412	393.445	-78.8987	457.918	-197.474	300.761	316.919	14.9359	-374.464	-292.417	256.724	154.35	417.591	-168.984	620.251	478.098	268.845	245.119	696.747	447.617	685.28	525.442	510.718	141.857	904.018	543.286	-348.5	443.679	44.7071
330	516.648	-157.82	-89.4547	-136.158	77.1458	177.422	124.722	57.5486	126.013	373.062	-63.8875	463.142	792.386	337.303	573.892	965.731	1049.71	885.973	359.106	-25.0759	150.363	420.632	33.5548	391.551	-363.321	301.851	87.6711	89.5147	-514.617	-169.932	225.264	27.1187	458.087	-3.88904	471.164	515.528	126.147	77.9172	245.804	368.664	502.314	255.763	418.453	192.991	727.53	668.806	-528.882	558.971	12.5833
335	580.996	-16.8094	-287.882	65.0203	110.743	-78.0661	-89.65	90.0366	43.7758	-30.7295	181.455	231.579	708.971	430.196	535.14	895.109	702.662	741.354	445.154	147.065	-1.97059	563.358	-446.601	209.349	125.088	409.645	363.976	-271.662	-512.857	-211.746	271.331	185.46	293.901	52.3026	598.438	499.167	65.9641	57.4446	463.469	164.222	492.364	473.868	446.262	136.949	955.768	595.058	-511.065	190.138	-144.236
340	427.336	-225.867	-147.561	-11.8894	78.1014	83.1562	-88.33	104.01	131.652	242.233	26.877	607.941	774.159	376.189	578.803	920.522	726.259	591.422	315.066	168.826	-1.41503	311.828	-14.0069	608.831	-133.88	238.039	107.624	-171.886	-362.759	-412.9	298.167	-44.3724	296.322	94.57	482.051	744.649	41.5823	159.661	641.836	342.213	422.217	525.153	565.032	186.378	740.354	604.507	-698.331	598.623	296.013
345	372.416	-67.0198	-170.086	98.1453	276.673	116.506	-196.15	155.009	300.623	-6.42492	-2.12872	262.55	816.579	230.863	596.161	956.23	468.708	623.621	295.01	0.95536	-147.824	469.993	-359.909	165.442	-218.623	261.63	-2.63024	-302.989	-380.552	-86.9926	129.075	-62.8651	439.364	-53.5878	246.238	630.66	-241.189	13.7003	367.441	263.314	460.792	211.143	192.36	3.01555	678.002	507.852	-749.182	331.778	46.0094
350	475.371	-119.275	-153.961	-138.048	272.98	178.046	29.6208	122.709	301.806	-7.84579	-4.34493	523.15	1171.02	253.65	381.762	859.572	850.863	866.321	317.894	232.955	-20.2761	477.902	62.96	355.619	-26.4068	393.746	128.674	-290.747	-315.142	-534.8	298.856	3.14286	206.212	-152.43	774.647	608.15	-68.6034	-77.6339	480.393	262.181	718.296	316.651	675.979	126.019	780.214	590.257	-632.054	551.123	-30.4245
355	492.05	-130.564	-130.748	-105.648	317.801	-89.5472	-383.454	92.0366	177.014	348.602	-88.5986	274.492	806.807	304.552	753.965	797.015	600.156	692.651	92.6511	-233.358	247.711	143.163	-42.9531	45.4309	-268.453	274.144	-7.62557	-39.1333	-533.987	-347.417	118.747	131.427	441.022	-48.7225	441.724	454.171	16.4465	-2.22917	266.586	171.611	345.385	124.458	191.901	148.627	883.398	222.118	-757.723	413.028	-155.305
360	621.422	14.8135	-162.099	44.2731	269.67	80.6623	-84.8	259.377	250.443	348.97	87.9875	327.925	686.269	168.24	429.345	862.541	807.4	550.07	183.547	-151.362	74.1247	-10.8594	-259.947	148.783	-489.985	171.299	-101.86	-82.201	-569.875	-99.0538	35.7724	-66.9395	236.186	-115.802	338.137	442.184	24.234	63.511	298.238	215.705	231.212	347.524	377.45	184.066	700.185	430.241	-381.311	559.405	-182.082
365	623.196	-337.686	-292.262	75.379	406.794	176.634	-264.675	97.4042	221.791	316.648	-47.3578	304.319	719.746	575.542	637.642	1168.45	670.61	509.122	205.276	69.0554	-48.8206	329.903	-285.775	296.584	-240.722	281.169	21.4987	-29.4093	-214.149	-217.717	-120.852	8.0873	148.245	-213.252	363.587	410.662	176.883	-79.5268	146.603	133.313	437.054	330.294	179.451	114.563	890.546	642.284	-862.424	558.305	-34.7327
370	87.7861	-7.28649	-276.089	-141.486	158.532	-39.4678	-257.52	27.4236	143.728	244.967	58.7542	258.141	598.424	560.286	401.607	879.019	965.134	604.654	316.17	-360.371	260.477	285.03	-234.648	348.552	-232.944	184.799	156.987	42.1949	-357.439	-349.486	178.508	-296.054	76.2731	-282.814	387.622	395.198	-73.6181	101.598	266.391	74.5742	272.183	346.228	255.806	47.6904	765.109	469.788	-633.308	352.757	-45.9077
375	294.464	-80.4733	-663.062	-81.4406	102.235	-172.951	-72.1115	95.4292	62.8581	351.23	-158.149	250.509	495.764	481.184	638.28	1060.94	946.825	490.135	299.109	-489.79	44.3529	435.263	-249.723	279.538	-301.127	-76.4994	130.654	-96.307	-113.786	-342.572	84.1738	-74.7429	342.712	-49.4806	330.372	580.751	-76.282	-0.70313	199.188	67.9316	504.66	430.641	281.468	141.96	718.255	378.644	-553.971	141.415	-151.072
380	157.73	-336.08	-107.021	-324.483	277.024	131.273	-191.483	2.90146	193.707	365.634	82.0875	608.781	685.874	627.838	840.326	1048.25	820.14	642.7	117.979	-223.849	-52.2706	310.889	-77.3308	185.898	-368.703	78.7175	149.729	-260.93	-122.879	-516.869	0.1185	26.6231	182.802	11.317	433.33	411.617	-122.722	76.752	202.685	7.6163	424.321	385.696	549.276	164.207	568.64	522.588	-658.406	211.183	-69.5833
385	41.3747	-413.134	-234.688	-113.105	311.974	-26.104	-340.11	126.775	264.895	177.15	-21.4125	148.432	636.11	179.026	961.398	864.593	889.242	441.701	159.766	-334.085	-13.923	151.929	-271.495	232.18	-529.304	241.214	-100.127	112.681	-264.308	-491.992	121.744	78.5767	273.997	-153.112	411.672	646.976	-38.7656	39.907	92.2626	156.735	581.719	145.659	185.778	184.925	608.109	517.483	-532.864	291.645	11.3926
390	608.91	-310.964	-597.382	-74.6269	346.678	-51.0318	-231.67	164.617	-11.5557	234.195	254.701	153.112	680.823	171.816	664.332	684.664	1007.24	649.885	416.663	-71.4409	133.914	266.737	25.9203	120.6	-187.62	-120.85	-142.603	-74.701	-51.3937	-559.84	129.547	84.5794	187.331	-190.36	765.7	577.399	81.86	333.612	207.942	92.4472	664.693	272.45	235.219	-35.4295	710.465	457.017	-678.78	232.97	-223.571
395	361.858	-391.986	-664.118	-52.7801	224.306	-248.712	-341.7	-74.3223	332.145	111.415	98.9173	334.242	647.151	213.606	309.549	756.488	703.243	797.224	306.14	-423.651	-160.002	175.326	-173.632	366.296	-334.123	99.5	28.359	-297.712	-357.461	-580.594	63.9298	91.6419	249.231	-109.009	219.963	421.175	127.439	31.4443	98.6557	106.045	637.052	122.148	219.49	-94.4766	770.519	319.779	-739.727	89.5431	-304.874
400	73.1842	-614.678	-549.096	28.4534	387.631	-80.4612	-282.625	-115.378	-112.257	213.269	63.8526	423.676	609.981	411.747	757.275	789.025	735.083	996.735	9.94312	-345.165	-23.5777	65.8457	-162.063	378.68	-424.574	143.747	0.01635	-373.468	-236.232	-373.983	-2.70549	183.887	179.386	-252.953	568.775	770.552	115.294	91.011	161.901	-131.089	688.285	69.1471	66.3076	82.9948	746.179	450.849	-646.902	189.098	-136.647
[truncated: 11 more columns]

## Sheet: WT_Stat phase_2
Time (s)	1 bg subtracted unnormed	2 bg subtracted unnormed	3 bg subtracted unnormed	4 bg subtracted unnormed	5 bg subtracted unnormed	6 bg subtracted unnormed	7 bg subtracted unnormed	8 bg subtracted unnormed	9 bg subtracted unnormed	10 bg subtracted unnormed	11 bg subtracted unnormed	12 bg subtracted unnormed	13 bg subtracted unnormed	14 bg subtracted unnormed	15 bg subtracted unnormed	16 bg subtracted unnormed	17 bg subtracted unnormed	18 bg subtracted unnormed	19 bg subtracted unnormed	20 bg subtracted unnormed	21 bg subtracted unnormed	22 bg subtracted unnormed	23 bg subtracted unnormed	24 bg subtracted unnormed	25 bg subtracted unnormed	26 bg subtracted unnormed	27 bg subtracted unnormed	28 bg subtracted unnormed	29 bg subtracted unnormed	30 bg subtracted unnormed	31 bg subtracted unnormed	32 bg subtracted unnormed	33 bg subtracted unnormed	34 bg subtracted unnormed	35 bg subtracted unnormed	36 bg subtracted unnormed	37 bg subtracted unnormed	38 bg subtracted unnormed	39 bg subtracted unnormed	40 bg subtracted unnormed	41 bg subtracted unnormed	42 bg subtracted unnormed	43 bg subtracted unnormed	44 bg subtracted unnormed	45 bg subtracted unnormed	46 bg subtracted unnormed	47 bg subtracted unnormed	48 bg subtracted unnormed	49 bg subtracted unnormed
10	0	0	0	0	0	0	0	0	0	0	0	0	0	0	0	0	0	0	0	0	0	0	0	0	0	0	0	0	0	0	0	0	0	0	0	0	0	0	0	0	0	0	0	0	0	0	0	0	0
15	-204.256	-265.093	-177.668	319.404	-146.593	-131.031	-162.947	-226.918	292.726	-249.498	52.6972	-273.933	-217.348	-144.753	-225.202	-83.3312	-57.1013	285.335	203.182	158.871	179.204	-192.645	102.535	-28.4524	-41.162	190.14	-118.329	131.188	-20.1956	-87.8913	-218.568	111.144	102.309	-174.082	28.8558	-75.6851	-98.7285	-226.398	-141.661	-200.303	227.522	4.60687	30.2937	-40.059	105.942	10.947	235.353	-358.97	223.597
35	-119.22	-431.219	-24.5982	311.943	-459.306	-216.471	-89.065	-358.818	-225.271	-440.972	-60.2094	-319.008	-312.008	-447.256	-492.756	-354.8	-660.47	-216.622	-69.7679	-218.931	-25.608	-220.054	-336.698	-434.298	-481.187	-28.8663	-246.331	-55.2381	-154.102	-450.088	-138.057	-296.129	-163.358	-120.357	-149.321	-439.971	-142.089	-53.4808	-617.353	-340.833	-47.6344	-111.496	-121.916	1.29758	-444.73	-150.154	-49.8163	-247.425	78.7801
40	-545.25	-456.759	-564.347	247.847	-223.537	-218.769	-133.718	-238.043	-143.644	-441.052	-176.987	-650.406	-213.82	-495.545	-263.457	-456.8	-284.555	-372.976	-110.626	-254.279	141.29	-516.929	-189.079	-422.145	-337.47	-177.167	-199.925	72.6581	-340.441	-188.161	-14.875	-426.532	-69.3181	-154.695	-71.4263	-279.124	-132.734	-150.685	-567.13	-591.312	-10.2237	-123.005	-13.1082	-214.993	-302.714	-89.1858	10.1067	-278.556	-139.414
45	-383.854	-1196.13	68.391	-162.89	-363.946	-296.145	-283.898	-55.8937	117.418	-339.511	-234.965	-505.945	-94.8187	-279.321	-267.234	-461.162	-372.127	-117.201	-18.0002	-191.236	143.985	-378.24	-294.232	-436.108	-239.415	-4.94492	-151.987	-65.0937	-459.446	-416.285	-284.23	-417.684	-164.809	-239.967	-275.678	-345.216	-224.043	-152.609	-467.052	-372.684	249.91	-1.66155	-66.306	-87.7671	-141.816	-72.7038	172.476	-296.802	33.7664
50	-9.76744	-669.929	-240.342	-233.696	-384.761	-354.539	-335.743	-307.05	-102.589	-618.927	-253.802	-261.988	-144.767	-436.04	3.09205	-249.187	-371.673	139.866	-291.147	-267.717	-182.149	-498.014	-328.537	-375.979	-246.931	-81.4981	-300.622	-178.049	-390.146	-65.7246	-100.278	-426.757	-301.894	-272.716	-195.885	-275.69	-136.961	-363.465	-601.451	-440.763	97.1627	-10.2297	-152.207	534.774	-238.93	100.417	78.4496	-417.822	35.6705
55	-561.049	-1079.77	-240.732	-462.054	-794.119	-458.251	-258.564	-341.613	-454.832	-788.891	-575.941	-450.533	-345.234	-746.196	-305.272	-482.479	-426.624	-386.028	-221.654	-293.408	-59.1897	-398.473	-347.793	-591.276	-549.119	-40.1409	-399.12	-147.152	-280.452	-235.213	-197.115	-594.211	-65.2556	-362.704	-470.095	-460.074	53.5467	-165.832	-718.624	-394.625	-52.2237	-114.616	-231.443	-238.554	-424.725	-64.7794	-192.621	-643.712	-140.725
60	-617.571	-1024.1	-552.959	-230.026	-374.79	-511.014	-363.776	-166.2	-145.012	-723.766	-328.918	-475.888	-303.513	-556.08	-129.298	-438.05	-514.294	-342.953	-202.008	-7.54391	-1.7845	-310.878	-241.74	-465.44	-437.32	-230.626	-85.4124	-84.3866	-467.015	-430.055	-288.044	-383.161	-167.01	-190.897	-244.968	-583.568	-57.8791	-356.077	-517.32	-244.974	-37.9181	-131.778	-38.8908	-299.387	-241.838	-307.792	-170.074	-693.113	86.5205
65	-713.351	-1075.67	-649.448	-202.835	-537.322	-568.321	-592.838	-378.341	-467.45	-809.364	-518.779	-565.25	-376.416	-564.173	-551.979	-409.85	-409.974	-318.36	-347.955	-400.867	-161.308	81.0725	-507.944	-463.046	-332.928	-118.554	-572.844	-161.07	-438.628	-458.2	-310.215	-609.984	-244.484	-321.659	-252.449	-514.495	-167.328	-529.713	-759.519	-375.457	-201.794	4.06765	-321.023	-112.096	-354.201	-418.632	-106.269	-648.285	-164.111
70	-677.818	-992.67	-374.73	-150.981	-792.112	-415.928	-527.857	-468.323	-508.705	-734.376	-745.014	-709.283	-447.039	-576.388	-449.778	-374.769	-593.645	-307.317	-387.077	-191.067	-170.834	-576.051	-586.715	-397.262	-699.975	58.9737	-288.735	75.6405	-382.363	-254.987	-701.278	-691.954	-244.388	-229.064	-669.792	-288.025	-170.19	-294.332	-497.773	-348.208	-201.169	-119.082	-212.83	-58.2891	-443.645	-96.5085	-324.788	-686.498	-18.104
90	-932.75	-1424.2	-806.648	-554.235	-1712.5	-707.589	-594.327	-860.334	-766.933	-1123.68	-707.39	-833.32	-563.242	-763.734	-612.833	-832.192	-725.157	-646.745	-505.759	-762.732	-263.392	-1028.38	-727.63	-677.098	-548.285	-501.852	-603.162	-525.102	-562.372	-525.501	-527.772	-722.653	-402.019	-502.328	-813.791	-712.743	-570.908	-717.056	-863.893	-569.264	-237.331	-353.825	-458.002	-325.07	-665.553	-277.782	-259.066	-1204.19	-315.375
95	-849.702	-1196.02	-480.832	-419.547	-1054.09	-583.608	-599.515	-489.601	-448.307	-880.374	-542.655	-743.521	-262.438	-666.54	-425.385	-465.05	-513.627	-527.863	-309.078	-379.977	54.7416	-447.269	-426.506	-525.292	-617.815	-287.06	-461.288	-107.512	-405.298	-476.073	-275.324	-472.326	-249.904	-547.649	-382.512	-305.416	-127.676	-329.31	-669.469	-400.763	-85.6372	-140.607	-269.26	-299.465	-737.246	-199.152	-273.693	-947.157	-223.745
100	-1345.95	-1642.23	-764.191	-697.659	-1561.52	-1031.31	-851.679	-1017.45	-1160.5	-1402.54	-1130.93	-1127.43	-1099.29	-1063.07	-804.423	-942.002	-947.022	-916.68	-802.719	-596.323	-732.534	-834.973	-841.617	-1190.9	-890.396	-572.906	-715.403	-453.123	-767.77	-843.336	-630.157	-1207.4	-671.569	-656.122	-749.276	-803.401	-557.852	-914.316	-942.157	-898.038	-587.59	-492.46	-594.9	-730.75	-783.92	-405.032	-499.113	-1256.37	-572.331
110	-748.63	-1702.64	-1005.56	-605.262	-1169.56	-598.528	-455.945	-726.482	-468.999	-946.598	-837.072	-1028.69	-491.858	-699.071	-589.371	-579.502	-575.93	-648.047	-468.757	-479.364	-109.852	-311.544	-326.929	-584.591	-616.65	-386.084	-407.275	-95.6524	-448.582	-523.279	-322.712	-670.672	-257.19	-578.845	-533.621	-494.764	-230.74	-411.858	-804.214	-616.097	-428.038	-518.325	-430.469	-43.303	-408.975	-302.704	250.754	-1096.89	-218.594
115	-882.443	-981.483	-644.562	-230.722	-962.441	-393.671	-383.477	-413.167	-378.735	-698.463	-287.288	-511.373	-59.5315	-485.274	-451.028	-509.374	-485.86	-346.814	-216.703	-209.538	-155.52	-434.303	-416.64	-611.449	-378.974	-355.831	-424.906	-233.8	-265.472	-311.53	-352.642	-525.12	-360.846	-542.143	-418.679	-456.325	-337.752	-229.145	-515.9	-626.479	-207.724	-385.683	-235.364	-207.811	-388.145	-62.8681	-62.8454	-965.376	-194.247
125	-489.651	-870.449	-293.162	-219.908	-767.616	-430.569	-479.504	-198.653	-290.274	-736.877	-156.06	-546.036	-280.663	-331.159	-268.64	-438.462	-489.809	-396.826	-178.393	94.8043	-51.8614	-263.316	-277.462	-267.489	-486.129	-53.736	-186.534	-122.466	-157.557	-396.915	-498.368	-330.163	-209.119	-191.345	-494.893	-427.053	-127.605	-419.643	-550.948	-538.663	-80.4492	-102.01	-91.6956	-252.825	-95.9674	-196.147	-46.3054	-689.248	-183.449
130	-751.167	-747.816	-482.741	-306.167	-1011.46	-391.22	-103.555	-235.505	-259.605	-641.555	-92.158	-595	-147.879	-354.578	-740.847	-566.375	-143.895	-484.416	-273.784	-199.684	-155.769	-440.199	-300.878	-336.531	-601.104	-250.467	-247.776	7.16971	-333.458	-386.663	-145.429	-392.55	-262.293	-300.534	-418.8	-248.972	-324.974	-514.818	-753.039	-503.382	-67.3383	-161.714	-134.315	-89.9602	-600.772	-257.957	-46.2768	-572.178	-246.417
135	-796.088	-997.529	-718.374	-105.266	-816.884	-450.333	-418.291	-191.529	-301.07	-681.869	-354.39	-693.54	-220.606	-500.727	-256.288	-506.619	-513.95	-394.872	-384.441	-273.527	50.6384	-501.633	-218.737	-342.918	-564.198	-206.684	-185.362	-162.09	-307.265	-509.702	-278.901	-792.072	-418.593	-384.175	-630.283	-522.403	-199.8	-551.855	-368.905	-594.353	-250.735	-295.064	-314.537	8.80702	-444.59	-244.656	-25.3261	-653.908	-271.907
140	-627.968	-1092.6	-628.767	-286.826	-831.714	-187.612	-105.987	-292.921	-238.631	-823.989	-305.627	-657.32	-242.139	-442.717	-365.061	-499.502	-236.329	-535.804	-259.656	-219.63	-180.168	-591.919	-579.077	-292.66	-342.475	-132.083	-405.351	-15.8609	-346.106	-347.659	-465.921	-801.428	-200.118	-438.434	-210.989	-490.966	-173.6	-439.851	-620.864	-499.583	-149.427	-172.689	-350.335	-274.96	-335.893	-357.07	92.3063	-562.007	-267.561
145	-523.042	-982.907	-652.715	-395.66	-831.777	-243.714	-261.305	-537.721	-117.105	-383.838	-150.631	-823.072	-241.568	-416.909	-388.022	-571.518	-668.787	-487.574	-119.129	-268.953	-54.8267	-410.848	-415.744	-249.19	-600.148	-197.693	-594.187	15.0532	-374.527	-396.781	-345.972	-503.084	-347.488	-401.334	-452.047	-309.378	-303.516	-503.432	-565.717	-427.737	-141.884	-322.796	-255.426	-302.36	-457.771	-346.553	23.1518	-467.574	-176.692
155	-478.895	-1171.3	-544.337	-199.205	-801.988	-301.746	-302.74	-494.72	-151.889	-673.178	-385.792	-1007.41	-286.592	-390.352	-475.061	-675.35	-826.575	-600.795	-430.782	-191.561	-122.226	-419.685	-765.35	-475.298	-314.935	-130.312	-429.408	40.4421	-667.407	-248.683	-243.177	-583.061	-123.756	-602.036	-439.245	-365.795	-238.322	-550.64	-771.812	-594.358	-405.414	-309.338	-249.296	-49.8879	-158.942	-172.963	6.42344	-518.739	-200.818
160	-719.783	-904.381	-679.848	-326.469	-1069.12	-463.894	-293.906	-393.506	-470.252	-676.542	-332.738	-876.525	-466.141	-411.799	-496.296	-631.735	-595.592	-440.592	-328.716	-467.604	-182.045	-517.371	-445.416	-554.708	-459.721	-238.896	-553.053	-184.766	-723.738	-589.766	-263.91	-594.073	-392.167	-518.451	-733.943	-744.878	-602.322	-483.425	-692.739	-533.712	-382.712	-521.083	-347.32	-143.542	-573.592	-289.833	-287.965	-548.922	-400.459
165	-638.08	-870.802	-941.424	-359.109	-839.852	-419.32	-202.277	-181.214	-324.435	-650.098	-415.382	-616.187	-111.399	-563.366	-558.045	-560.294	-1090.7	-553.204	-205.975	-265.638	-209.449	-549.83	-539.087	-433.757	-152.252	-108.539	-327.046	-68.3274	-404.42	-514.899	-410.131	-722.371	-465.201	-487.003	-575.742	-521.795	-316.056	-147.518	-848.692	-680.663	-85.5374	-303.332	-278.906	-314.81	-388.341	-214.652	-211.785	-605.742	-368.269
170	-582.208	-859.518	-540.168	-280.653	-1055.16	-383.655	-259.518	-362.918	-238.855	-933.408	-275.191	-866.917	89.1975	-482.943	-367.561	-559.734	-924.583	-471.88	-314.518	-466.663	-136.961	-725.103	-394.108	-603.299	-415.055	-286.947	-414.495	-241.011	-374.634	-471.459	-337.088	-502.037	-494.51	-655.675	-602.728	-569.934	-412.784	-517.132	-674.41	-470.829	-264.888	-478.607	-127.59	-333.662	-1068.36	-297.499	-174.257	-608.959	-526.417
175	-809.102	-1165.78	-826.768	-435.62	-1154.84	-587.086	-236.934	-293.412	-554.841	-1073.22	-556.361	-1052.31	-21.6131	-498.531	-389.34	-741.986	-1201.82	-692.15	-317.801	-439.292	-182.736	-403.855	-372.201	-558.19	-634.764	-74.068	-292.803	-37.4931	-442.953	-325.756	-307.172	-663.72	-356.912	-408.848	-365.361	-664.878	-309.772	-426.922	-735.681	-527.278	-402.44	-296.564	-257.26	-315.52	-638.745	-319.967	-226.602	-863.095	-249.006
180	-1199.88	-1712.42	-1298	-799.715	-1355.71	-1006.51	-725.324	-783.838	-1074.09	-1386.58	-1121.88	-1342.38	-324.893	-855.679	-856.425	-921.717	-1006.72	-925.044	-1029.1	-721.025	-572.62	-712.94	-943.46	-835.682	-846.198	-571.826	-813.761	-467.972	-934.896	-953.46	-814.066	-659.55	-791.981	-836.445	-962.085	-716.972	-604.644	-891.804	-951.464	-964.601	-722.144	-765.412	-541.555	-581.456	-724.884	-519.169	-302.428	-1290.19	-674.366
185	-1058.42	-1436.39	-993.163	-809.36	-1368.26	-814.438	-729.426	-734.018	-811.16	-1210.47	-565.844	-1277.31	-261.452	-724.768	-653.68	-749.493	-1045.78	-744.468	-594.885	-282.834	-333.77	-683.24	-784.681	-720.603	-700.794	-447.666	-633.692	-272.288	-667.128	-726.255	-599.016	-835.767	-612.578	-644.398	-454.346	-726.406	-404.191	-527.949	-700.125	-792.95	-517.307	-820.807	-413.257	-284.47	-642.093	-443.284	-356.913	-1226.07	-435.101
190	-888.696	-1133.96	-838.282	-580.153	-1312.72	-379.825	-531.466	-425.514	-621.095	-806.008	-460.276	-1139.89	193.81	-765.699	-806.083	-754.633	-633.676	-572.521	-487.307	-184.828	-222.466	-578.929	-659.888	-731.595	-693.118	-441.053	-672.847	-182.971	-435.155	-622.828	-476.674	-557.538	-376.406	-600.783	-508.1	-544.406	-284.343	-457.708	-676.115	-622.105	-328.724	-559.19	-437.127	-114.693	-706.133	-464.353	-74.8292	-880.817	-465.916
195	-949.385	-1187.4	-1087.05	-601.586	-1150.52	-859.253	-605.977	-703.567	-1076.14	-1006.36	-844.658	-1250.93	59.6824	-1041.53	-696.007	-840.524	-816.036	-397.831	-624.174	-570.085	-370.765	-481.876	-741.769	-658.238	-641.968	-453.004	-670.418	-297.254	-404.033	-838.983	-291.997	-856.889	-626.006	-581.266	-390.918	-689.17	-425.743	-471.437	-814.042	-642.333	-290.604	-686.136	-374.723	-485.904	-762.757	-432.174	-599.73	-1089.68	-388.85
200	-1198.09	-1476.78	-974.115	-809.424	-1424.69	-863.377	-823.794	-786.431	-1218.01	-1056.36	-1027.39	-1403.2	-367.301	-974.562	-849.483	-890.767	-990.551	-925.334	-783.761	-451.808	-687.875	-759.843	-917.983	-1090.55	-679.688	-658.061	-942.977	-496.378	-542.388	-863.089	-666.581	-997.715	-520.568	-746.767	-633.44	-454.381	-548.09	-386.04	-1064.21	-592.142	-391.277	-638.801	-497.792	-721.806	-596.012	-513.101	-300.231	-1316.53	-503.359
205	-800.373	-1197.43	-987.626	-622.29	-1097.41	-697.129	-603.414	-522.397	-1011.63	-974.774	-594.756	-1024.35	59.2035	-849.257	-586.033	-638.877	-713.812	-628.483	-727.24	-314.722	-93.3729	-602.45	-728.43	-641.263	-581.607	-525.304	-669.371	-282.502	-475.002	-665.436	-553.524	-672.093	-560.227	-631.783	-319.874	-514.092	-301.158	-536.46	-755.752	-762.006	-370.371	-482.812	-569.948	-531.001	-740.6	-198.601	-260.573	-1022.01	-393.21
210	-677.325	-1301.03	-989.36	-689.814	-1163.73	-744.489	-638.08	-732.627	-977.499	-898.348	-798.911	-1321.08	76.2592	-517.656	-631.392	-745.774	-594.679	-500.235	-619.551	-406.532	-141.713	-672.657	-372.268	-755.333	-670.085	-289.752	-576.419	-254.315	-419.18	-791.795	-255.779	-784.004	-376.321	-627.345	-539.118	-485.37	-400.212	-465.727	-825.318	-431.1	-268.49	-254.76	-365.16	-491.382	-714.871	-318.725	-229.45	-912.392	-508.791
215	-576.72	-1088.16	-845.193	-375.749	-1201.99	-507.251	-400.92	-481.5	-827.153	-863.372	-578.68	-883.24	-14.1571	-448.498	-559.196	-737.142	-647.705	-354.093	-482.944	292.11	-205.208	-604.793	-309.642	-563.17	-597.293	-375.449	-491.722	-68.4595	-338.898	-673.469	-290.751	-736.436	-241.128	-333.482	-345.721	-269.808	-213.131	-227.526	-524.532	-324.647	-337.831	-378.008	-428.178	-231.443	-682.914	-523.844	-152.784	-827.622	-225.565
220	-839.472	-1137.64	-760.065	-490.262	-1115.88	-621.487	-394.302	-555.336	-665.518	-1086.2	-453.623	-1092.57	-110.674	-660.622	-470.411	-712.811	-691.403	-348.035	-437.932	47.453	-98.0521	-556.392	-511.981	-494.931	-538.354	-139.35	-485.894	-45.6811	-507.91	-462.417	-305.717	-783.084	-325.067	-590.81	-413.14	-246.644	-316.928	-327.066	-1008.54	-874.971	-577.349	-444.081	-496.896	-677.234	-569.024	-317.786	-108.435	-802.344	-257.336
225	-860.564	-1451.12	-914.602	-506.26	-1631.54	-604.867	-765.955	-542.394	-800.095	-1078.26	-808.388	-1215.75	-265.424	-792.583	-561.476	-741.705	-948.235	-581.304	-681.273	-146.43	-425.031	-613.944	-300.633	-855.33	-447.403	-312.483	-543.803	-66.8246	-466.881	-782.009	-442.25	-887.783	-540.131	-653.004	-571.214	-455.984	-520.899	-530.51	-816.143	-887.336	-444.626	-536.097	-321.023	-615.236	-708.67	-454.197	-243.92	-917.124	-476.914
230	-938.939	-1622.06	-989.001	-643.783	-1401.63	-732.029	-423.33	-608.627	-1035.51	-1226.64	-897.851	-1139.86	-232.603	-759.785	-748.73	-1003.7	-766.352	-715.488	-486.241	-76.838	-242.386	-760.279	-692.416	-567.655	-280.811	-86.5586	-793.97	-0.98443	-545.329	-506.012	-454.727	-798.192	-666.511	-575.265	-660.9	-245.725	-472.058	-597.198	-634.503	-651.611	-596.043	-409.958	-473.013	-492.247	-549.952	-431.246	-376.94	-1042	-464.562
245	-1382.37	-1920.39	-1490.27	-1028.56	-1817.19	-1256.06	-1030.16	-819.45	-1432.94	-1530.94	-1606.1	-1715.15	-475.107	-1126.13	-1205.02	-1083.61	-1096.89	-956.357	-1061.63	-387.28	-394.002	-1039.36	-970.452	-1117.11	-1143.23	-917.54	-1307.56	-347.544	-911.73	-1105.22	-692.171	-1205.33	-760.943	-877.517	-916.968	-898.405	-811.82	-1172.69	-1374.9	-1128.65	-906.001	-757.725	-845.065	-835.605	-940.709	-724.991	-643.319	-1508.73	-532.129
250	-1273	-1940.04	-1510.29	-1018.62	-1559.81	-992.461	-1070.09	-1055.83	-1451.4	-1742.84	-1612.91	-1424.46	-559.437	-1110.39	-1211.36	-1085.23	-1163.66	-985.911	-1009.69	-688.299	-678.907	-1007.48	-1205.9	-1339.19	-1100.76	-729.967	-915.41	-665.793	-925.596	-777.686	-889.324	-1110.89	-905.041	-1037	-830.968	-785.365	-747.18	-840.469	-1218.02	-1041.99	-801.521	-1025.55	-895.873	-902.304	-1234.75	-708.272	-359.127	-1385.82	-866.985
260	-965.281	-1597.33	-1258.5	-767.529	-1263.43	-770.061	-722.804	-739.226	-1055.42	-1188.61	-888.243	-1030.49	-261.155	-802.263	-701.426	-820.345	-767.823	-698.94	-709.79	-188.971	-363.885	-766.951	-888.006	-614.22	-620.509	-507.41	-874.132	-277.821	-411.208	-725.828	-533.2	-774.372	-556.05	-547.359	-470.613	-553.77	-500.799	-544.841	-1085.2	-602.559	-494.828	-482.893	-352.914	-555.611	-724.167	-481.715	-351.651	-985.299	-393.385
265	-1199.52	-1996.22	-1220.73	-1031.2	-1590.37	-1096.4	-871.689	-1170.09	-1392.49	-1546.5	-1159.27	-1490.92	-600.063	-1012.23	-1114.13	-1172.47	-1293.95	-1038.84	-914.703	-491.055	-483.656	-972.179	-979.841	-1208.41	-817.849	-474.742	-1032.11	-509.083	-984.445	-936.1	-724.619	-1040.12	-813.784	-920.12	-767.238	-679.234	-843.981	-742.955	-1439.08	-947.806	-878.91	-631.148	-811.743	-774.693	-1068.84	-571.362	-361.319	-1472.88	-712.641
275	-1037.03	-1545.79	-1071.75	-698.205	-1260.86	-624.955	-599.144	-559.384	-842.03	-1051.88	-734.59	-950	-303.235	-585.886	-606.29	-690.3	-832.127	-751.313	-536.578	-245.077	-304.968	-576.921	-542.283	-619.533	-666.856	-292.891	-684.053	-373.491	-659.187	-562.008	-525.36	-737.512	-771.059	-579.772	-491.615	-511.005	-442.487	-648.218	-834.228	-420.529	-454.346	-576.729	-274.925	-708.093	-594.189	-382.156	-239.89	-879.253	-420.653
280	-1216.76	-1874.94	-1131.22	-813.696	-1723.73	-774.84	-881.118	-710.824	-1147.71	-1504.23	-1185.55	-1345.69	-483.726	-923.413	-792.009	-773.584	-1058.75	-811.083	-769.772	-487.679	-478.502	-928.367	-734.218	-1178.21	-813.885	-498.526	-991.59	-430.544	-759.698	-1006.87	-675.104	-995.194	-630.456	-737.639	-561.065	-871.381	-641.443	-786.337	-1234.46	-747.553	-816.92	-627.643	-404.172	-471.505	-1047.71	-470.599	-391.262	-1098.54	-523.174
290	-1425.15	-1899.03	-1406.69	-1204.04	-1895.05	-1095.02	-990.368	-720.271	-1578.87	-1782.02	-1373.36	-1436.09	-518.546	-1195.46	-916.548	-830.933	-1121.4	-985.991	-888.957	-393.898	-592.737	-960.047	-1077.18	-1082.7	-1155.48	-773.417	-1046.82	-761.231	-911.012	-1075.45	-718.433	-1124.76	-808.661	-994.378	-705.78	-943.036	-749.037	-796.057	-1347.42	-1143.26	-703.898	-827.858	-541.501	-944.001	-956.345	-663.725	-460.108	-1337.31	-625.594
310	-1072.87	-1902.92	-1215.19	-964.401	-1741.06	-1001.14	-773.284	-564.172	-1224.18	-1572.97	-1203.06	-1318.57	-419.587	-1041.37	-870.038	-1008.89	-1131.08	-993.588	-707.025	-574.45	-483.499	-778.681	-974.242	-1096.68	-842.431	-673.084	-921.92	-546.718	-653.452	-841.424	-688.482	-1191.05	-714.214	-888.784	-877.07	-793.714	-680.398	-589.22	-955.623	-997.294	-513.942	-643.557	-593.78	-982.587	-655.214	-329.942	-567.442	-1060.76	-504.629
325	-1090.97	-1859.62	-1098.79	-855.46	-1590.24	-908.159	-888.192	-757.647	-1368.46	-1364.29	-903.829	-916.392	-468.212	-1004.88	-789.94	-1018.62	-963.956	-977.875	-761.058	-477.79	-597.88	-936.677	-805.605	-993.656	-760.964	-604.494	-920.195	-484.952	-742.114	-809.736	-766.101	-1111.86	-1042.41	-895.063	-805.306	-1178.43	-747.64	-590.453	-1075.74	-879.459	-735.046	-884.893	-571.269	-1044.07	-737.297	-503.513	-320.359	-1468.73	-589.366
335	-1135.38	-2017.1	-1052.25	-883.168	-1509.01	-1084.47	-731.284	-967.059	-1421.96	-1540.8	-1447.32	-1139.4	-544.057	-1161.98	-1207.72	-1055.33	-1105.41	-978.575	-920.221	-442.008	-511.71	-932.87	-980.365	-1343.5	-988.163	-393.979	-926.178	-671.465	-591.698	-718.602	-805.868	-990.314	-848.042	-813.288	-870.169	-729.468	-788.772	-809.138	-1477.95	-1098.3	-631.974	-600.919	-700.726	-879.614	-808.484	-717.43	-443.683	-1250.63	-544.988
340	-1131.75	-1985.9	-981.227	-926.396	-1746.65	-929.514	-898.655	-922.586	-1295.9	-1668.96	-1186.56	-1284.11	-443.889	-1111.9	-812.096	-912.722	-1131.45	-1088.27	-903.632	-398.483	-503.675	-717.21	-1059.51	-1333.66	-940.198	-802.09	-1039.84	-502.758	-794.043	-894.952	-731.713	-1059.89	-842.956	-763.26	-648.606	-659.617	-650.436	-1119.97	-1120.93	-902.841	-644.186	-595.574	-698.721	-822.137	-931.192	-585.212	-712.049	-1463.39	-533.158
345	-1142.74	-1722.14	-1163.65	-1024.66	-1549.53	-836.969	-806.234	-969.115	-1248.77	-1379.91	-1339.91	-867.094	-559.987	-1165.92	-922	-1034.18	-916.885	-937.312	-964.846	-459.868	-353.809	-923.723	-1164.79	-1293.49	-714.698	-539.026	-1047.96	-560.531	-720.989	-892.957	-626.099	-992.126	-859.878	-1005.76	-885.051	-930.314	-870.399	-798.445	-1485.53	-797.823	-657.451	-653.623	-780.61	-788.533	-1000.88	-691.812	-406.305	-1256.99	-607.614
350	-1329.39	-2089.3	-1360.34	-971.397	-1819.51	-1071.16	-1038.77	-1040.62	-1146.02	-1652.27	-1128.6	-1113.24	-688.95	-925.997	-1043.26	-996.92	-1003.11	-988.426	-1029.85	-456.18	-629.067	-801.994	-983.548	-1198.92	-843.671	-670.411	-896.866	-545.554	-975.468	-994.548	-561.703	-1102.74	-738.133	-822.3	-735.752	-1124.67	-681.531	-1010.63	-1256.69	-901.385	-643.442	-840.842	-617.812	-560.176	-1139.17	-517.934	-199.901	-1362.39	-603.148
355	-797.324	-1686.35	-992.429	-881.846	-1331.18	-867.202	-766.464	-866.011	-957.744	-1446.6	-882.298	-908.732	-315.257	-856.355	-695.205	-1026.43	-898.7	-860.205	-779.75	-348.31	-461.943	-650.499	-789.548	-1099.46	-695.914	-567.22	-788.428	-198.716	-512.608	-612.431	-384.919	-836.895	-660.868	-695.32	-794.677	-741.776	-530.852	-710.398	-927.177	-747.493	-638.375	-503.148	-419.313	-736.007	-984.963	-417.569	-162.204	-1093.09	-336.556
360	-1085.81	-1650.91	-867.006	-676.661	-1247.42	-891.002	-653.993	-571.542	-942.375	-1227.59	-691.536	-749.167	-54.2169	-659.102	-916.073	-884.143	-605.708	-702.134	-672.634	-230.09	-208.391	-939.815	-585.381	-787.033	-628.198	-542.589	-796.15	-304.229	-278.846	-523.21	-362.495	-575.099	-725.128	-739.734	-719	-681.036	-535.191	-534.963	-796.324	-846.014	-405.452	-474.976	-550.691	-690.922	-835.808	-521.229	-68.6429	-1099.26	-438.537
365	-940.138	-1784.68	-1090.01	-707.887	-1692.41	-1068.52	-932.418	-882.331	-934.747	-1391.86	-1256.67	-766.944	-332.749	-998.503	-894.967	-938.581	-969.606	-766.912	-848.144	-309.335	-460.936	-539.076	-812.846	-1105.07	-765.998	-316.934	-1060.36	-430.737	-673.562	-712.728	-480.652	-871.14	-895.074	-650.345	-727.799	-770.876	-718.115	-934.29	-767.141	-865.139	-686.382	-510.784	-679.651	-882.969	-1099.85	-501.722	-487.319	-1153.53	-384.006
370	-1077.15	-1880.47	-1222.44	-1014.02	-1693.93	-1004.73	-1034.82	-848.949	-1147.16	-1543.72	-1269.03	-1067.09	-563.83	-935.285	-917.634	-989.4	-1008.35	-834.071	-916.489	-384.45	-521.132	-776.635	-912.658	-1054.09	-783.591	-521.976	-849.6	-602.019	-389.374	-913.271	-684.889	-977.663	-641.672	-987.262	-924.214	-877.258	-744.749	-864.855	-1086.44	-1039.37	-671.307	-636.536	-546.08	-783.037	-944.203	-624.972	-569.062	-1202.16	-492.365
375	-1002.58	-1739.32	-965.789	-799.427	-1574.82	-1031.5	-780.192	-737.312	-957.097	-1494.33	-1066.41	-861.691	-337.878	-900.263	-665.192	-868.248	-876.078	-472.317	-711.819	-189.223	-551.267	-787.402	-858.715	-1052.81	-561.46	-540.175	-849.16	-293.315	-856.992	-529.719	-533.917	-930.413	-800.662	-735.756	-687.722	-632.86	-675.34	-759.308	-962.604	-857.139	-589.672	-499.884	-531.724	-644.347	-869.453	-466.748	-340.69	-1119.23	-366.089
380	-779.371	-1588.22	-940.275	-648.276	-1172.06	-663.811	-459.206	-282.838	-767.87	-1038.25	-627.993	-406.726	-115.357	-777.544	-734.174	-774.335	-770.475	-637.163	-805.836	-94.7457	-236.202	-568.723	-764.676	-862.711	-614.648	-339.856	-668.591	-178.728	-580.651	-698.107	-480.274	-747.649	-657.712	-459.623	-543.394	-609.122	-369.629	-483.272	-688.904	-744.847	-362.336	-535.755	-562.005	-508.249	-693.158	-431.052	-362.244	-767.6	-272.265
385	-772.439	-1739.4	-985.256	-702.58	-1335.68	-851.011	-685.153	-654.324	-1015.15	-1154.64	-866.226	-722.323	-180.253	-742.711	-444.358	-950.623	-801.897	-624.811	-667.678	-106.587	-289.745	-609.571	-543.366	-758.808	-773.286	-389.776	-510.02	-395.288	-362.34	-671.22	-481.173	-728.108	-549.18	-712.898	-518.794	-520.39	-608.686	-551.986	-1078.04	-660.237	-490.562	-497.964	-432.815	-518.304	-945.187	-470.302	-326.514	-869.048	-316.655
390	-1029.94	-1557.46	-779.238	-643.34	-1312.52	-533.975	-519.832	-445.342	-814.307	-949.303	-685.998	-669.749	-165.072	-764.478	-618.632	-678.182	-833.993	-388.495	-623.039	-163.498	-294.303	-600.33	-801.433	-876.248	-701.585	-277.782	-480.737	-426.268	-504.865	-401.077	-546.99	-763.47	-421.506	-544.867	-592.582	-945.833	-498.936	-605.368	-890.871	-716.538	-421.974	-375.129	-412.757	-527.238	-836.727	-669.78	-90.304	-808.97	-437.142
395	-735.909	-1447.43	-762.021	-810.291	-1302.34	-771.102	-608.951	-366.111	-953.849	-1246.99	-843.545	-692.82	-82.7446	-642.764	-528.468	-724.628	-746.368	-781.247	-521.468	61.2685	-418.688	-873.997	-760.163	-701.169	-523.1	-433.343	-813.47	-233.805	-222.718	-484.518	-595.574	-907.95	-407.985	-550.289	-607.051	-446.89	-569.6	-685.301	-776.603	-841.325	-375.689	-355.885	-480.574	-766.143	-770.304	-463.144	-342.848	-968.248	-245.765
400	-1168.3	-1896.86	-940.446	-1005.6	-1789.34	-940.211	-968.5	-844.628	-849.581	-1502.51	-1211.48	-1047.44	-592.691	-905.013	-804.048	-781.481	-1091.21	-625.15	-772.818	-263.915	-420.131	-951.398	-1040.4	-1182.78	-753.905	-486.586	-1043.86	-435.377	-844.321	-991.983	-337.964	-1170.33	-652.181	-900.97	-721.76	-833.574	-791.295	-755.181	-1177.78	-1076.25	-607.049	-754.818	-738.193	-900.53	-790.218	-570.95	-532.939	-1329.54	-504.129
[truncated: 68 more columns]

## Sheet: WT_Stat phase_3
Time (s)	1 bg subtracted unnormed	2 bg subtracted unnormed	3 bg subtracted unnormed	4 bg subtracted unnormed	5 bg subtracted unnormed	6 bg subtracted unnormed	7 bg subtracted unnormed	8 bg subtracted unnormed	9 bg subtracted unnormed	10 bg subtracted unnormed	11 bg subtracted unnormed	12 bg subtracted unnormed	13 bg subtracted unnormed	14 bg subtracted unnormed	15 bg subtracted unnormed	16 bg subtracted unnormed	17 bg subtracted unnormed	18 bg subtracted unnormed	19 bg subtracted unnormed	20 bg subtracted unnormed	21 bg subtracted unnormed	22 bg subtracted unnormed	23 bg subtracted unnormed	24 bg subtracted unnormed	25 bg subtracted unnormed	26 bg subtracted unnormed	27 bg subtracted unnormed	28 bg subtracted unnormed	29 bg subtracted unnormed	30 bg subtracted unnormed	31 bg subtracted unnormed	32 bg subtracted unnormed	33 bg subtracted unnormed	34 bg subtracted unnormed	35 bg subtracted unnormed	36 bg subtracted unnormed	37 bg subtracted unnormed	38 bg subtracted unnormed	39 bg subtracted unnormed	40 bg subtracted unnormed	41 bg subtracted unnormed	42 bg subtracted unnormed	43 bg subtracted unnormed	44 bg subtracted unnormed	45 bg subtracted unnormed	46 bg subtracted unnormed	47 bg subtracted unnormed	48 bg subtracted unnormed	49 bg subtracted unnormed
0	0	0	0	0	0	0	0	0	0	0	0	0	0	0	0	0	0	0	0	0	0	0	0	0	0	0	0	0	0	0	0	0	0	0	0	0	0	0	0	0	0	0	0	0	0	0	0	0	0
5	-26.9438	-260.902	-63.6382	-274.288	45.5658	219.787	514.81	-220.687	168.306	185.398	-116.791	-72.3881	-84.5748	25.6761	-227.25	-80.7808	-594.67	-283.213	454.283	125.25	187.89	533.475	339.964	29.6378	-40.8942	75.9394	256.861	-87.2087	15.2321	331.503	240.088	-4.60459	-15.5062	-69.4016	-192.729	174.802	416.29	68.7034	-103.124	-26.8685	-277.547	166.521	256.84	-249.471	-181.97	7.05238	218.083	-33.3721	44.4015
10	41.679	-303.108	-35.6083	201.584	63.8581	169.235	-111.825	24.2111	261.318	82.6288	104.923	-239.039	-86.8243	-83.6852	-333.643	-364.856	195.092	-326.318	283.146	67.0502	119.028	18.9745	165.795	-127.351	-127.513	-25.5172	355.06	-499.379	-79.807	66.8283	232.262	-478.678	75.1418	157.409	-97.5594	235.391	-280.27	-147.928	249.214	165.836	117.873	332.182	81.5053	-402.984	200.832	-38.3843	-325.762	-82.8422	379.129
15	-312.477	-352.856	-328.915	-15.2103	-92.2778	-37.6787	-408.689	-232.056	172.319	-85.0196	-224.782	-375.69	100.227	-70.2289	-532.984	-499.679	-510.75	-120.472	178.104	96.4449	-110.552	449.721	93.0654	-438.483	-121.74	-72.9394	-4.02223	-370.54	-5.6875	23.6309	-263.45	-50.6641	-18.3582	-276.107	652.682	35.6665	-159.476	-150.591	-6.80655	-60.3083	74.4354	122	213.558	-212.9	-203.427	-154.117	-294.841	-5.11022	313.715
20	-57.5309	11.8238	74.3333	-97.8578	165.132	163.89	-314.142	-260.616	172.912	115.525	-57.2247	108.044	569.226	-217.592	-822.822	-340.961	-1158.17	-183.406	139.931	-12.3704	-31.3774	466.471	65.4153	-219.23	-235.833	-90.5847	-8.91253	-211.888	80.9248	-115.487	59.3726	-467.706	75.9252	-133.91	116.434	35.493	-53.2029	55.968	26.1014	-33.9372	72.6636	161.744	54.4749	239.924	127.988	-100.631	-106.616	-106.963	91.503
25	-105.042	-52.3012	44.1009	-240.23	-47.196	-428.657	-394.352	-172.211	285.984	-102.078	-61.7767	-368.534	111.527	-327.644	-610.776	-410.545	-536.077	-281.658	99.1111	-232.344	-258.531	220.207	527.733	-348.025	97.6458	-5.48333	-222.761	-122.581	39.3841	-10.3933	-21.0616	91.9122	36.5018	-158.882	-227.354	-186.04	-29.1525	-376.528	-328.18	79.487	-254.914	445.868	-44.5796	-432.145	78.5855	-115.462	-165.077	-126.674	75.1918
30	-82.2812	-433.548	185.423	157.411	-25.8986	331.712	-562.955	-283.52	193.641	12.9271	-8.61319	-76.2093	112.844	-463.005	-463.992	-317.94	-691.825	-426.637	-114.991	-234.388	-197.734	2.14895	1.11004	-160.217	-14	-265.167	-190.424	-226.248	39.0268	318.053	-20.0841	-203.198	-199.463	-141.435	5.03016	-237.495	-32.7632	-417.416	51.697	72.4632	-140.452	-26.444	-13.5985	-129.288	-78.5132	203.507	-392.241	204.783	253.405
35	-147.317	-344.018	107.405	-22.0559	-76.1218	52.469	-273.259	-276.424	628.714	70.5833	-91.1354	143.451	105.945	-512.256	-668.147	-589.079	-938.275	-229.105	-207.063	-385.029	-16.0532	-42.3197	289.856	-373.151	-335.722	-310.4	-229.749	-596.622	-66.3539	27.3941	-37.4803	-261.756	-364.672	-137.083	-137.294	3.51961	-107.921	-474.384	-285.814	102.551	159.365	457.782	-32.7115	55.7073	53.2781	8.8121	-473.143	-60.5922	-44.2947
40	-235.31	-33.2065	-316.56	-395.589	-49.4122	104.624	-178.519	-445.682	-18.3709	-6.72549	-0.99905	-416.314	-0.06736	-399.049	-592.851	-544.548	-1086.23	-427.691	-132.682	-194.459	-22.3317	345.045	425.392	-432.725	50.1858	-417.633	-183.726	-302.272	-99.814	-530.949	-210.04	-443.146	-267.289	-127.801	-250.753	33.4111	-288.006	-271.11	-377.558	-8.22204	-401.294	153.294	-15.6511	-419.432	57.3727	-222.037	-311.333	20.0589	-198.757
45	-47.5668	-560.984	-183.186	-255.289	-152.5	-26.277	-351.22	-137.309	-97.3722	-26.5941	-189.617	-358.695	-35.0682	-195.281	-670.535	-462.79	-1668.49	-450.801	30.2654	-1.59781	-281.75	153.905	8.23233	-270.086	-203.047	-104.149	-507.328	-400.717	-33.713	-29.272	-260.187	-305.375	7.87755	-210.952	-374.514	-172.511	-150.931	-333.458	-251.608	-114.139	-143.679	186.584	189.998	-298.5	-204.75	331.957	-366.394	-48.5922	92.6666
50	-164.049	-336.243	42.7542	-47.7047	-96.4214	-192.027	-152.893	79.9304	90.1094	-277.977	-263.267	-270.246	143.285	-126.457	-919.474	-497.301	-317.508	-247.818	-11.9556	-155.983	-233.683	258.895	-132.553	-240.112	74.4062	-267.091	-156.659	-618.852	-36.1122	58.6784	-114.44	-259.149	-330.675	-347.585	-287.253	-1.89476	-243.883	-308.508	34.2809	-190.733	-128.707	249.402	46.8965	88.3295	48.7105	408.712	-385.787	-65.0343	116.552
55	-177.157	-646.761	-252.175	-249.08	-414.237	-136.27	-133.316	-454.37	34.9162	-219.336	-197.171	-291.994	-142.924	-638.169	-722.547	-532.179	-913.225	-425.122	63.0087	-303.94	-189.66	305.997	-21.0267	-472.262	-508.559	-536.656	-499.606	-580.961	-491.113	-29.773	-433.441	-578.753	-576.536	-465.831	-332.536	-267.848	-561.882	-712.803	-486.886	-211.49	-224.264	-251.363	-189.231	-134.085	-180.547	-161.348	-555.384	-502.038	-296.308
60	-75.8688	-402.357	-505.538	-334.699	-140.569	-458.801	-437.559	-433.251	119.975	-478.689	-227.768	-292.821	-515.858	-571.999	-1052.32	-571.44	-1183.72	-180.946	-151.415	-417.138	-190.404	-40.7933	15.61	-528.887	-242.125	-346.625	-398.654	-655.473	-580.976	-590.115	-390.137	-834.113	-546.419	-649.831	-484.763	-541.015	-421.112	-575.58	-230.217	-276.875	-755.614	-515.226	-242.957	16.0349	-523.382	-261.316	-518.052	-199.42	-391.044
65	-104.132	-231.26	-724.764	-221.943	-467.48	-125.043	-660.066	-390.539	-162.216	-507.877	-517.937	-126.061	-320.999	-890.69	-744.358	-688.034	-1543.26	-244.116	-313.706	-353.599	-232.716	97.4148	-450.398	-467.02	-651.275	-531.738	-478.761	-752.299	-587.352	-443.947	-508.642	-817.713	-567.443	-666.104	-700.37	-379.729	-693.827	-963.852	-501.596	-374.437	-564.349	-533.603	-161.287	-368.538	-604.174	-456.254	-661.404	-415.558	-271.158
70	-322.083	-851.074	-292.785	-231.539	-504.955	-62.4764	-229.236	-516.187	-162.541	-393.598	-327.607	-489.227	-279.745	-815.87	-1170.79	-866.154	-1491.82	-334.005	-261.741	-385.673	-334.475	17.674	-92.3508	-446.439	-773.66	-437.167	-526.443	-778.577	-723.848	-572.819	-708.625	-706.505	-262.948	-385.614	-391.602	-316.628	-393.543	-878.412	-711.098	-341.396	-466.497	-324.767	42.7694	-436.368	-385.277	-480.73	-727.595	-490.103	-508.537
75	-421.953	-615.718	-369.611	-364.219	-495.197	-239.97	-813.919	-531.528	-170.709	-380.35	-237.278	-337.494	-398.372	-693.412	-1291.37	-921.372	-1378.53	-338.82	-446.083	-323.643	-508.964	305.728	-251.743	-705.441	-517.004	-738.769	-503.328	-709.668	-499.006	-180.349	-844.522	-738.97	-302.267	-452.439	-554.517	-109.221	-457.438	-954.881	-744.504	-210.471	-561.241	-665.362	-26.1749	-136.885	-420.389	-514.652	-713.609	-568.485	-328.461
80	-550.374	-875.534	-736.801	-413.943	-744.625	-583.873	-884.645	-851.971	-378.32	-822.343	-747.685	-668.502	-663.127	-945.75	-1255.1	-1119.65	-1733.69	-378.452	-453.71	-600.371	-588.781	-536.885	-734.421	-989.307	-1030.85	-889.976	-595.517	-882.243	-771.379	-511.31	-790.868	-1350.76	-731.483	-1041.95	-789.402	-569.758	-1090.47	-1040.74	-1092.7	-779.573	-998.787	-876.653	-350.014	-892.237	-667.289	-707.546	-1116.12	-661.118	-702.587
85	-425.942	-946.379	-718.264	-786.549	-695.034	-459.994	-922.85	-859.191	-266.035	-601.602	-568.286	-878.81	-534.608	-1159.43	-1389.57	-1419.47	-1822.43	-498.429	-289.142	-665.199	-751.661	-156.244	-672.425	-939.018	-1009.13	-901.538	-710.392	-1200.21	-677.795	-501.204	-999.571	-1138.86	-572.111	-1031.05	-722.797	-619.333	-1155.61	-1099.62	-642.044	-470.672	-669.25	-634.608	-180.65	-655.451	-607.438	-499.235	-1133.94	-953.599	-831.474
90	-958.532	-1115.73	-776.458	-1067.27	-817.953	-538.915	-990.97	-765.373	-449.472	-762.042	-813.745	-851.041	-586.094	-1306.17	-1572.28	-1137.6	-1848.31	-539.163	-681.7	-886.505	-949.042	-518.279	-757.213	-1221.34	-995.594	-1004.98	-773.495	-1173.35	-966.71	-819.698	-1109.33	-1513.86	-454.221	-1084.8	-644.989	-973.269	-731.545	-1340.21	-1060.97	-645.696	-874.418	-575.979	-425.313	-592.066	-481.697	-550.906	-1353.21	-937.895	-807.581
95	-644.03	-595.026	-793.538	-688.219	-637.596	-470.327	-355.559	-619.272	-256.108	-672.144	-385.826	-592.914	-535.763	-1010.92	-1349.05	-989.107	-1403.02	-614.323	-617.549	-781.96	-662.631	-251.555	-735.51	-885.024	-974.604	-1021.83	-790.545	-881.54	-887.03	-445.819	-908.53	-1036.51	-480.956	-1037	-768.093	-687.653	-741.363	-957.362	-1106.17	-367.797	-800.37	-704.963	-515.779	-710.538	-570.884	-574.416	-1055.64	-711.876	-830.51
100	-593.503	-1060.47	-494.542	-614.878	-883.2	23.5759	-789.217	-689.3	-558.275	-730.659	-608.376	-404.927	-392.094	-851.833	-1177.4	-1107.05	-1587.36	-275.4	-301.007	-679.181	-593.27	-71.2531	-606.085	-727.105	-921.831	-850.056	-707.119	-948.338	-761.641	-62.9466	-864.455	-787.412	-575.866	-835.945	-829.643	-677.688	-820.768	-1044.31	-1022.1	-514.484	-496.601	-689.722	-230.394	-994.352	-694.96	-579.877	-1121.65	-668.098	-1010.24
105	-556.9	-960.978	-603.415	-722.45	-557.044	-698.867	-175.759	-711.26	-297.147	-713.568	-717.565	-636.268	-445.407	-522.833	-1185.65	-1311.02	-1797.36	-683.487	-459.966	-648.487	-497.551	-42.9752	-580.941	-843.704	-721.945	-647.411	-471.239	-797.052	-545.146	-174.646	-615.814	-794.334	-744	-879.999	-789.185	-599.402	-750.039	-1080.05	-963.624	-448.279	-321.758	-401.499	-210.521	-689.514	-621.732	-473.755	-1225.4	-620.946	-658.361
110	-875.419	-812.762	-710.583	-538.036	-715.764	-581.574	-50.0541	-691.355	-324.022	-620.635	-429.763	-19.8005	-385.788	-944.435	-921.395	-644.155	-1339.3	-361.943	-584.027	-590.292	-607.172	-98.0063	-553.265	-846.483	-843.218	-1095.02	-568.674	-1022.35	-775.886	-382.711	-710.674	-997.301	-665.835	-850.633	-436.943	-807.05	-759.851	-989.302	-811.544	-552.21	-744.406	-563.36	-223.548	-855.73	-484.382	-528.593	-1074.89	-272.547	-749.597
115	-570.345	-566.322	-376.45	-300.876	-533.55	-506.078	-538.566	-470.932	82.158	-350.981	-1001.47	-351.5	-325.814	-687.422	-877.94	-822.312	-1398.77	-320.822	-365.479	-462.362	-725.467	-225.615	-435.573	-461.046	-552.902	-945.847	-653.693	-1065.49	-631.661	-668.159	-606.788	-1018.77	-332.208	-323.465	-336.222	-569.849	-605.101	-845.251	-780.134	-463.388	-398.841	-759.379	-120.757	-167.783	-547.032	-433.162	-793.362	-882.189	-920.192
120	-435.765	-632.093	-104.78	-182.619	-174.114	-144.733	-345.914	-478.432	262.481	-490.432	-706.109	-140.522	-313.768	-594.433	-680.411	133.215	-1435.75	-502.125	-221.988	-193.668	-24.4617	-84.836	-247.082	-651.454	-565.304	-601.954	-455.417	-731.671	-237.952	-316.685	-249.233	-904.253	-31.2618	-643.029	-176.752	-124.547	-191.472	-865.579	-478.926	-85.6037	-791.563	-278.765	312.112	-395.435	-352.689	245.922	-500.161	-454.008	-448.128
125	-699.16	-642.67	-448.975	28.42	-453.845	-338.064	-484.087	-341.432	-248.03	-565.475	-283.273	-133.099	-333.732	-625.009	-751.79	-580.655	-1525.2	-242.866	-425.902	-670.108	-436.039	30.0381	-378.951	-871.324	-636.817	-742.869	-552.295	-992.389	-577.563	-301.917	-845.262	-844.229	-238.921	-470.869	-378.585	-464.968	-755.404	-820.15	-838.869	-215.581	-641.423	-80.232	7.86976	-702.094	-438.734	-199.602	-768.855	-556.031	-675.716
130	-929.961	-997.787	-572.099	-775.268	-814.574	-547.006	-683.859	-615.017	-522.143	-671.722	-579.264	-818.422	-526.105	-748.757	-1228.63	-781.364	-1785.92	-766.614	-253.583	-638.061	-647.601	-289.53	-327.951	-986.969	-719.53	-1187.07	-714.068	-1158.75	-868.596	-316.289	-913.267	-962.544	-426.959	-1038.11	-662.871	-1105.65	-790.83	-1208.42	-898.641	-309.376	-787.684	-456.477	-181.145	-628.188	-531.533	-639.454	-1148.31	-706.631	-770.461
135	-834.513	-791.027	-534.867	-617.489	-513.221	-338.946	-391.044	-706.77	69.6683	-600.733	-531.905	-755.52	-343.739	-715.572	-1021.18	-726.083	-1835.22	-636.975	-393.004	-708.507	-449.564	-335.001	-536.172	-746.456	-880.484	-725.386	-473.305	-907.377	-677.992	-193.207	-785.48	-763.67	-569.174	-781.93	-413.059	-803.708	-885.936	-1189.12	-969.786	-521.43	-471.653	-858.796	-153.112	-737.559	-404.546	-607.79	-826.229	-496.308	-759.207
140	-325.49	-423.392	-301.98	-206.36	-797.603	-261.606	-726.962	-313.704	-128.775	-347.965	-305.145	-232.362	-274.577	-495.394	-989.518	-251.297	-1731.62	-601.669	-170.399	-616.268	-398.666	29.8742	-401.619	-772.232	-698.585	-626.991	-382.739	-760.515	-389.688	-646.846	-477.698	-695.113	-491.886	-642.028	-660.222	-488.953	-705.621	-704.097	-782.124	-238.087	-457.457	-479.248	-105.768	-762	-270.408	-547.651	-579.418	-559.742	-751.294
145	-764.76	-965.022	-310.863	-582.589	-624.283	-424.413	-429.571	-640.831	-294.917	-890.141	-132.02	-721.361	-700.776	-388.415	-1008.18	-829.232	-1509.89	-576.291	-187.331	-541.005	-386.581	-206.772	-439.121	-669.175	-820.083	-758.492	-606.159	-749.38	-783.23	-301.027	-779.064	-529.285	-619.173	-522.952	-684.072	-673.49	-566.256	-1101.98	-608.253	-228.139	-501.152	-221.658	-149.516	-447.4	-491.908	-425.963	-972.538	-531.594	-394.678
150	-595.017	-763.593	-532.073	-762.706	-827.007	-683.572	-647.185	-520.7	-523.915	-725.088	-161.328	-725.535	-411.863	-879.909	-1156.67	-756.226	-1539.97	-800.984	-457.984	-731.016	-557.701	-27.6737	-619.205	-1087.77	-729.45	-885.917	-518.074	-896.238	-643.589	-155.589	-714.022	-875.05	-470.789	-998.824	-340.283	-524.287	-819.204	-1382.2	-840.801	-480.206	-177.53	-293.312	-197.119	-733.706	-260.251	-579.918	-783.565	-789.669	-578.607
155	-822.118	-657.455	-449.699	-696.743	-616.708	-535.875	-193.346	-776.803	-320.62	-712.705	-361.108	-625.168	-372.824	-817.5	-1204.7	-914.143	-1759.27	-740.206	-503.433	-481.024	-618.966	-309.351	-761.842	-957.125	-926.555	-1147.6	-526.157	-1054.17	-801.577	-444.995	-818.05	-582.153	-581.364	-1072.49	-763.612	-1251.21	-1007.08	-1101.31	-443.536	-616.243	-468.147	-550.643	-359.369	-790.934	-274.442	-648.514	-1054.22	-711.473	-1134.26
160	-828.47	-1016.45	-393.19	-253.378	-942.886	-681.413	-638.825	-661.922	-445.016	-646.137	-821.934	-642.383	-312.415	-776.048	-911.202	-785.947	-1881.31	-469.877	-227.22	-671.906	-433.672	260.561	-62.1261	-811.164	-602.625	-940.206	-345.457	-498.459	-918.884	-554.453	-752.124	-906.181	-319.286	-837.007	-335.793	-693.231	-686.107	-1184.46	-646.968	-367.677	-504.999	-222.688	-197.938	-1112.57	-95.829	-379.711	-680.509	-656.692	-774.941
165	-791.629	-391.165	-523.49	-771.385	-804.969	-206.928	-503.939	-436.1	-226.051	-639.538	-498.254	-521.334	-185.804	-918.965	-1003.03	-764.012	-1706.94	-750.832	-92.8705	-844.362	-570.448	-60.0286	-338.959	-837.183	-881.366	-825.635	-441.25	-957.488	-650.775	-340.796	-807.989	-1247.88	-537.832	-953.708	-741.514	-709.485	-985.41	-1510.8	-498.489	-623.822	-620.883	-893.602	-271.054	-931.603	-114.335	-441.74	-1002.62	-774.146	-876.038
170	-841.529	-346.806	-230.272	-758.125	-423.819	-408.186	-708.372	-1006.12	-639.893	-902.447	-811.216	-289.045	-476.62	-740.918	-939.628	-783.34	-1906.03	-724.59	-219.598	-639.029	-847.477	-221.565	-399.696	-801.575	-723.151	-1040.73	-592.228	-1017.37	-894.754	-411.369	-666.216	-1071.6	-612.289	-843.333	-545.632	-897.276	-1015.57	-1170.04	-516.802	-577.117	-866.174	-558.358	-416.632	-637.306	-528.387	-572.056	-982.482	-832.91	-767.566
175	-960.39	-1188.37	-875.333	-1050.54	-857.294	-764.57	-607.236	-964.363	-504.671	-791.961	-768.375	-909.363	-450.98	-1057.51	-1245.07	-915.538	-1921.55	-797.81	-492.85	-702.246	-811.207	-712.907	-429.432	-1053.31	-974.604	-1219.42	-771.355	-1318.38	-835.777	-817.896	-1199.69	-903.887	-926.289	-1290.66	-624.704	-1237.42	-1274.05	-1485.17	-985.271	-819.163	-648.991	-648.542	-398.06	-895.312	-753.956	-777.625	-1113.98	-983.725	-1095.49
180	-944.102	-208.517	-418.142	-668.654	-687.936	-490.23	-483.259	-588.591	-469.005	-1073.85	-739.532	-728.668	-322.546	-912.554	-1054.69	-923.07	-1803.08	-732.281	-348.456	-586.185	-785.113	-404.583	-648.283	-690.5	-928.927	-982.185	-426.368	-926.054	-837.307	-574.017	-1044	-920.713	-897.964	-873.988	-861.427	-1190.96	-901.197	-1253.09	-744.911	-489.349	-620.02	-771.702	-135.592	-670.794	-533.411	-452.958	-876.027	-720.9	-981.548
185	-660.608	-863.183	-574.313	-652.93	-749.278	-773.2	-516.401	-664.172	-557.129	-722.514	-687.407	-530.107	-800.676	-946.619	-1147.62	-1057.63	-1805.54	-945.21	-310.736	-549.737	-793.208	-278.211	-765.9	-1079.65	-844.013	-1209.25	-673.109	-928.957	-905.968	-713.455	-1138.25	-1129.68	-866.272	-1032.42	-811.594	-1103.52	-1191.59	-1482.43	-1168.39	-837.56	-565.484	-384.803	-421.712	-770.232	-524.02	-607.577	-1272.04	-926.525	-1032.41
190	-847.479	-1138.05	-590.833	-601.027	-969.382	-542.782	-608.981	-916.798	-347.153	-817.387	-570.102	-938.178	-491.685	-802.491	-1036.15	-810.865	-1826.98	-618.952	-290.047	-731.976	-762.75	-212.925	-200.78	-1149.6	-1003.19	-1026.19	-445.12	-1082.85	-685.716	-451.605	-993.867	-1374.26	-734.172	-887.462	-662.448	-1166.6	-1025.16	-1477.87	-1140.25	-649.963	-739.23	-668.135	-170.794	-687.797	-680.831	-498.436	-1327.77	-1050.84	-1026.63
195	-802.462	-821.856	-569.269	-632.065	-739.171	-308.371	-685.736	-846.705	-534.007	-535.181	-600.785	-961.908	-471.852	-865.067	-1283.88	-990.801	-2056.54	-858.416	-311.937	-664.602	-776.459	-324.077	-535.962	-814.178	-817.229	-923.96	-353.07	-899.953	-927.713	-703.713	-846.855	-1130.58	-270.08	-996.785	-461.498	-1026.26	-907.768	-1042.62	-872.52	-621.007	-797.801	-581.743	-712.212	-966.771	-815.527	-590.913	-967.81	-915.488	-911.586
200	-938.593	-1240.03	-475.014	-912.032	-432.865	-506.756	-830.235	-975.859	-422.818	-607.667	-342.432	-728.502	-638.691	-913.852	-859.23	-718.904	-1914.24	-828.731	-424.039	-603.674	-900.503	-223.713	-159.41	-1234.78	-895.54	-1036.71	-939.634	-943.419	-763.286	-620.945	-890.025	-684.285	-458.938	-1203.81	-730.221	-1177.19	-1093.21	-1309.89	-429.061	-751.781	-919.827	-913.643	-584.997	-830.318	-799.5	-756.132	-1449.13	-878.473	-854.617
205	-660.988	-1099.76	-307.619	-914.232	-563.5	-549.321	-784.775	-797.12	-786.206	-711.343	-443.248	-1192.54	-572.891	-1086.27	-1151.01	-1010.73	-1845.62	-578.335	-545.132	-646.863	-946.569	-434.527	-505.641	-944.175	-937.06	-1001.34	-435.049	-842.913	-735.216	-745.002	-1294.64	-785.225	-940.173	-1032.23	-642.481	-1055.43	-917.597	-1225.06	-485.199	-723.095	-816.29	-1100.15	-397.53	-1023.25	-690.218	-664.496	-1032.54	-941.484	-897.778
210	-918.123	-1097.55	-665.033	-1000.19	-533.097	-540.34	-816.759	-701.002	-723.748	-1080.33	-562.601	-1169.05	-598.213	-875.472	-1315.49	-1268.99	-2323.05	-1135.05	-428.415	-800.898	-999.771	-299.485	-420.337	-995.325	-1045.97	-1084.64	-779.62	-958.682	-868.968	-732.77	-1311.79	-1430.51	-720.004	-1294.36	-888.023	-1280.46	-1196.19	-1545.27	-796.737	-816.004	-875.141	-1214.45	-540.93	-934.026	-552.379	-997.889	-1100.79	-865.308	-1143.51
215	-864.421	-1143.51	-269.282	-651.789	-675.434	-807.102	-1075.44	-782.421	-427.291	-681.556	-614.227	-962.204	-745.568	-873.015	-1071.34	-944.911	-2287.46	-861.608	-99.7576	-583.707	-748.819	-55.2717	-607.14	-762.657	-609.586	-927.745	-594.527	-895.222	-716.512	-650.781	-862.248	-1242.36	-559.253	-875.652	-725.945	-808.34	-870.347	-1191.29	-158.73	-584.486	-1003.62	-826.434	-136.919	-722.149	-648.789	-704.114	-1109.25	-996.373	-1159.04
220	-811.118	-1051.38	-617.629	-434.089	-497.013	-489.782	-518.685	-815.911	-568.312	-752.486	-157.198	-452.215	-624.661	-969.776	-956.018	-867.764	-2205.52	-734.116	-349.885	-723.581	-799.369	4.80993	-577.804	-879.294	-789.249	-1097.71	-404.066	-987.689	-486.729	-1059.78	-849.177	-955.644	-162.797	-999.137	-701.232	-1066.29	-1060.56	-992.72	-533.612	-398.39	-733.02	-682.714	-237.203	-664.767	-585.754	-467.255	-985.162	-916.379	-860.055
225	-647.459	-738.457	-654.083	-424.523	-509.421	-692.356	-325.778	-379.4	-569.834	-553.617	-402.45	-871.239	-460.248	-664.06	-1029.58	-862.988	-2002.5	-607.914	-88.5281	-520.461	-829.111	-193.325	-477.918	-611.944	-826.354	-1092.37	-532.485	-888.007	-597.014	-786.115	-958.246	-1231.01	-423.491	-1116.42	-485.281	-1062.89	-760.677	-1421.13	-446.409	-499.116	-713.233	-440.51	-239.409	-501.279	-419.046	-614.79	-685.61	-919.711	-954.466
230	-940.77	-683.222	-473.727	-696.452	-747.447	-623.741	-568.839	-642.328	-911.49	-617.347	-501.182	-1089.42	-505.32	-795.644	-1331.82	-1099.64	-2485.2	-768.99	-284.483	-773.802	-948.757	-403.076	-562.87	-881.349	-730.376	-1254.54	-369.49	-752.257	-638.48	-601.141	-986.98	-1383.09	-699.895	-914.972	-669.01	-967.12	-864.56	-1069.8	-151.926	-537.206	-697.874	-463.947	-375.923	-880.432	-438.385	-579.885	-906.179	-842.487	-1017.42
235	-723.78	-1188.21	-345.567	-534.551	-690.921	-603.914	-499.124	-320.109	-466.166	-745.446	-530.289	-963.404	-420.545	-492.444	-1297.73	-775.416	-2366.06	-644.602	-437.636	-659.147	-681.971	-347.679	-282.14	-1022.53	-832.704	-1343.87	-637.414	-1124.67	-555.721	-906.186	-1236.41	-1251.51	-811.955	-1069.88	-812.659	-1214.35	-917.112	-1033.59	-571.067	-587.726	-667.247	-648.548	-480.314	-698.06	-609.897	-619.455	-990.452	-699.284	-746.832
240	-1140.23	-1005.28	-721.072	-832.573	-863.158	-666.744	-831.529	-1038.11	-807.079	-914.495	-487.299	-736.386	-517.61	-784.528	-1413.89	-1246.27	-2794.28	-886.699	-740.316	-876.63	-982.488	-341.429	-1002.91	-1041.24	-995.011	-1521.94	-811.631	-1202.53	-815.936	-1036.56	-1339.76	-1059.97	-759.627	-961.654	-978.012	-1464.74	-883.73	-1293.27	-663.652	-954.043	-780.627	-794.434	-695.048	-831.634	-831.885	-943.968	-1181.36	-878.635	-1357.93
245	-1411.49	-1406.53	-888.615	-831.673	-729.171	-832.956	-790.034	-1105.42	-778.976	-1281.88	-947.071	-1006.4	-843.58	-856.583	-1745.4	-1200.95	-2703.2	-1193.51	-611.414	-1060.42	-1084.03	-703.388	-849.553	-1137.74	-1301.49	-1503.57	-860.229	-1275.91	-811.427	-808.092	-1245.78	-1625.15	-923.269	-1263.63	-1174.78	-1422.48	-1449.42	-1393.15	-591.343	-828.978	-962.556	-886.336	-780.98	-1050.52	-693.087	-1088.71	-1356.3	-997.134	-1337.5
250	-1198.06	-1272.59	-774.472	-931.42	-880.417	-1000.53	-545.914	-1012.42	-759.355	-1064.87	-786.748	-866.021	-807.953	-1113.31	-1508.55	-1527.04	-2979.66	-923.15	-561.202	-949.951	-1067.46	-546.862	-1001.66	-1153.26	-1130.97	-1532.24	-636.345	-1108.97	-1023.05	-867.099	-1464.08	-1375.36	-1172.73	-1086.58	-898.755	-1358.09	-1287.32	-1315.76	-593.852	-984.507	-1109.71	-898.478	-813.53	-789.561	-794.939	-821.041	-1282.15	-1063.91	-1235.32
255	-1087.68	-1340.82	-979.833	-1089.16	-1023.55	-1135.68	-641.031	-1105.39	-936.791	-1204.82	-533.531	-1123.21	-846.311	-1140.93	-1601.21	-1348.96	-2534.3	-962.632	-846.747	-1201.54	-1073.6	-388.577	-527.678	-940.014	-1189.69	-1625.61	-984.884	-1529.11	-899.571	-1391.17	-1425.56	-1535.49	-741.831	-1284.37	-1103.9	-1189.91	-1436.14	-1611.89	-625.311	-1147.85	-1277.77	-1209.21	-1010.03	-746.643	-844.497	-1048.71	-1316.14	-1315.4	-1438.43
260	-1117.33	-1362.63	-925.514	-870.623	-798.55	-735.046	-1113.39	-1140.11	-988.581	-1259.12	-641.805	-978.657	-973.011	-1045.74	-1425.19	-1263.68	-2894.56	-1250.39	-892.975	-1044.8	-1108.71	-455.095	-1037.02	-1165.98	-1288.76	-1503.61	-1161.59	-1223.86	-1053.91	-1080.11	-1493.88	-1609.61	-1032.57	-1491.06	-1064.38	-1609.29	-1368.27	-1661.02	-767.109	-1250.04	-1286.83	-801.665	-1123.81	-1057.49	-949.714	-1109.4	-1480.91	-1322.28	-1316.34
265	-791.198	-1077.67	-630.844	-635.659	-504.237	-585.42	-700.384	-769.962	-658.775	-930.593	-480.918	-877.334	-354.387	-828.272	-1137.26	-869.666	-2534.94	-634.402	-344.894	-618.96	-766.177	-453.595	-501.707	-761.401	-611.192	-1255.91	-385.22	-604.523	-517.234	-915.274	-930.837	-1477.18	-665.329	-1302.45	-548.76	-954.047	-1135.8	-1383.52	-305.515	-696.236	-1009.26	-871.717	-615.058	-695.231	-758.026	-645.471	-911.122	-936.588	-733.107
270	-888.597	-1120.22	-468.282	-653.494	-579.436	-423.228	-609.499	-826.559	-565.195	-788.345	-375.028	-373.138	-346.165	-998.653	-1500.92	-1036.14	-2552.29	-840.053	-253.85	-929.818	-912.764	-263.707	-494.838	-1055.8	-1090.18	-1320.36	-878.614	-855.126	-767.461	-764.137	-1204.51	-1458.35	-793.75	-997.441	-851.392	-1163.33	-773.285	-1406.84	-335.069	-598.369	-915.662	-564.932	-631.636	-665.977	-704.355	-918.235	-1110.51	-920.636	-880.987
275	-1178.11	-1019.25	-701.344	-718.239	-809.358	-489.395	-848.19	-983.517	-905.623	-841.431	-740.238	-965.309	-766.121	-1086.52	-1312.1	-1327.42	-2763.05	-1200.18	-382.402	-782.308	-1149.19	-456.199	-720.237	-1221.3	-837.066	-1235.86	-910.136	-1371.76	-1047.74	-940.112	-1244.96	-1327.33	-1026.15	-1210.54	-886.893	-1219.55	-1208.67	-1502.28	-521.374	-835.915	-1424.07	-929.414	-944.891	-980.405	-810.702	-983.251	-1378.06	-1202.63	-883.974
280	-715.535	-1191.58	-747.387	-812.019	-838.818	-475.067	-627.439	-826.752	-836.903	-755.873	-517.677	-557.281	-625.627	-917.325	-1457.06	-976.423	-2490.14	-872.196	-98.8176	-731.657	-917.31	43.0748	-719.328	-1035.24	-922.231	-1186.23	-742.359	-739.556	-840.127	-652.846	-836.24	-1011.18	-815.853	-1309.34	-615.855	-974.298	-1198.52	-1199.05	-414.666	-726.239	-1340.72	-795.292	-584.211	-846.112	-602.039	-536.848	-1113.86	-1027.59	-1024.7
285	-1140.73	-1364.94	-838.783	-882.773	-813.34	-1002.46	-1221.14	-981.714	-1044.46	-1080.12	-805.482	-1115.42	-659.096	-1031.49	-1803.65	-1363.11	-2880.08	-1192.12	-306.572	-1070.11	-1471.31	-421.962	-617.168	-1213.06	-1150.4	-1228.74	-790.333	-1100.26	-1343.38	-722.116	-1308.86	-1525.23	-1353.46	-1316.34	-1081.39	-1143.29	-1293.55	-1443.52	-661.106	-1032.32	-1096.15	-773.326	-924.231	-1211.67	-850.885	-649.689	-1523.86	-1220.79	-1126.63
290	-1575.38	-1325.58	-1026.72	-1136.69	-1316.25	-802.635	-856.741	-1149.79	-1149.64	-1026.1	-949.464	-1019.69	-973.421	-1122.33	-1734.08	-1294.47	-3033.38	-993.504	-530.923	-1227.97	-1243.34	-786.126	-1058	-1082.81	-1210.84	-1558.73	-827.553	-1564.7	-1251.4	-736.816	-1533.33	-1434	-1261.52	-1692.78	-1077.57	-1188.47	-1274.45	-1690.12	-710.676	-1030.43	-1019.04	-1229.99	-885.994	-1082.83	-1072.35	-998.184	-1538.36	-1529.45	-932.132
295	-1725.92	-1416.55	-892.663	-1010.35	-1037.48	-900.332	-1163.27	-1534.18	-1010.51	-1116.4	-804.697	-1210.79	-624.056	-1272.54	-1933.53	-1425.42	-2851.83	-1294.53	-804.578	-1118.44	-1257.93	-821.154	-1180.26	-1447.29	-1533.18	-1530.99	-1126.39	-1573.48	-1508.33	-1027.82	-1623.9	-1785.32	-1259.44	-1699.14	-1169.78	-1694.98	-1363.69	-1629.05	-1011.21	-1027.64	-1016.63	-1219.51	-876.545	-1186.75	-892.313	-1091.98	-1658.72	-1422.52	-1448.2
300	-1473.39	-1802.51	-1612.89	-1211.3	-1537.67	-1252.93	-1653.27	-1812.03	-1410.98	-1358.2	-1464.32	-1500.3	-1326.98	-1577.21	-2152.02	-1943.99	-3205.59	-1824.85	-917.586	-1396.47	-1812.69	-878.604	-1096.2	-1831.46	-1657.79	-2078.53	-1301.13	-1824.49	-1541.59	-1093.69	-1609.09	-1797.11	-1734.58	-1827.38	-1631.12	-1932.88	-1979.6	-2210.92	-1651.55	-1455.5	-1398.79	-1415.67	-1353.95	-1543.27	-1211.89	-1277.3	-1784.55	-1740.93	-1696.57
305	-1117.74	-1466.81	-1045.1	-1054.22	-1310.83	-832.76	-1376.71	-1215.64	-1049.52	-1202.73	-978.661	-1169.48	-819.018	-1294.83	-1834.08	-1589.31	-2952.07	-1235.34	-796.767	-1117.06	-1346.15	-691.463	-1074.08	-1335.85	-1343.59	-1606.14	-1055.08	-1315.75	-1262.62	-902.454	-1639.67	-1645.51	-1610.33	-1985.1	-1345.94	-1487.19	-1458.46	-1570.72	-1272.7	-1389.2	-1396.63	-1550.26	-1075.55	-977.343	-1109.28	-1387.39	-1802.71	-1405.82	-1439.45
310	-1605.15	-1591.38	-1381.97	-1086.35	-1056.4	-1157.15	-1587.29	-1643.32	-1163.23	-1384.77	-1054.62	-1448.14	-911.23	-1368.48	-1870.25	-1728.94	-3271.29	-1110.66	-939.628	-1541.66	-1738.81	-1038.51	-1146.95	-1859.35	-1578.49	-1840.78	-1210.43	-1649.93	-1466.14	-1333.52	-1462.99	-1820.74	-1348.65	-1778.71	-1340	-1464.19	-1556.39	-2132.67	-1478.29	-1391.3	-1467.44	-1370.85	-954.419	-1137.98	-965.752	-1230.02	-1659.15	-1439.72	-1524.91
315	-987.652	-961.8	-694.503	-874.406	-611.958	-563.234	-730.944	-997.972	-481.432	-988.948	-403.521	-715.559	-263.875	-601.596	-1532.54	-1125.42	-2511.29	-907.888	-188.214	-830.555	-934.638	-406.585	-639.084	-680.046	-944.536	-1264.5	-423.11	-1131.12	-887.837	-504.179	-573.435	-1508.37	-803.557	-1263.49	-826.1	-945.745	-1072.33	-1206.07	-313.723	-734.856	-1011.74	-511.292	-342.348	-475.342	-505.911	-669.086	-1404.81	-807.668	-1216.86
320	-862.375	-1152.58	-446.822	-463.762	-485.083	-550.604	-730.914	-537.539	-458.353	-959.198	-124.064	-503.599	31.1068	-666.878	-1427.72	-1122.09	-2499.51	-537.402	67.9906	-541.526	-721.489	-71.4475	-524.377	-547.389	-796.81	-877.92	-630.328	-852.401	-577.911	-1026.91	-678.528	-1094.25	-720.241	-1187.92	-695.062	-846.429	-805.506	-1222.03	-367.767	-513.049	-1025.1	-507.45	-49.3415	-583.493	-218.914	-461.26	-1041.24	-1000	-694.568
325	-593.108	-705.843	-274.695	-504.554	-575.679	-465.105	-490.041	-892.138	-315.316	-677.401	-322.175	-199.252	-129.479	-451.74	-1401.82	-1079.04	-2383.4	-542.923	-25.3395	-375.562	-635.13	-331.482	-83.6747	-462.875	-634.519	-1148.86	-405.817	-1024.98	-680.304	-218.451	-743.119	-1359.55	-645.304	-1019.94	-522.224	-835.64	-938.755	-934.591	-208.555	-450.052	-736.106	-190.382	-149.042	-255.618	-443.092	-588.514	-1179.85	-660.035	-857.861
330	-778.568	-841.383	-610.688	-390.117	-736.507	-790.599	-785.124	-856.599	-586.827	-628.472	-992.004	-470.214	-425.864	-507.521	-1330.3	-1162.69	-2730.26	-848.693	-324.527	-778.228	-925.084	-354.491	-274.987	-820.178	-935.162	-929.509	-813.864	-937.738	-801.795	-275.452	-708.288	-1192.51	-907.187	-1135.2	-471.854	-866.164	-835.084	-1180.77	-364.556	-345.03	-1183.67	-476.998	-164.56	-554.562	-260.064	-554.514	-1050.25	-687.858	-738.109
335	-660.553	-1129	-555.948	-203.96	-352.72	-500.321	-687.911	-921.324	-419.501	-579.868	-191.807	-602.577	-380.04	-313.006	-1530.24	-828.632	-2299.38	-489.248	-165.212	-821.795	-922.517	-329.34	-330.932	-230.154	-679.941	-1004.84	-239.066	-949.832	-797.668	-865.927	-711.22	-1083.51	-569.972	-1051.88	-675.039	-680.762	-949.425	-863.638	-254.492	-535.596	-721.484	-456.891	-54.239	-445.551	-268.877	-498.514	-1153.04	-539.229	-723.809
340	-744.995	-912.06	-656.344	-769.417	-697.361	-453.719	-464.201	-856.286	-725.756	-822.114	-145.809	-594.144	-548.791	-614.518	-1506.15	-1039.88	-2477.8	-787.109	-325.852	-746.737	-892.406	-382.935	-581.092	-823.846	-711.888	-1178.79	-685.005	-970.005	-853.354	-565.698	-840.773	-935.272	-613.246	-1123.47	-435.091	-768.334	-986.837	-1159.67	-148.371	-565.676	-746.021	-412.919	-230.669	-160.794	-353.689	-478.705	-1448.33	-1220.97	-851.907
345	-1163.57	-1298.68	-800.15	-619.748	-834.05	-708.232	-978.616	-835.831	-572.506	-1065.99	-539.105	-734.987	-302.5	-785.7	-1476.72	-1701.41	-2679.32	-831.853	-577.739	-1048.68	-1106.45	-525.999	-639.756	-731.586	-904.859	-1369.63	-365.82	-1335.24	-1033.1	-601.828	-1007.07	-782.766	-1144.01	-1417.14	-968.557	-1207.68	-1224.46	-1548.51	-274.81	-872.421	-1007.72	-782.653	-369.554	-949.333	-496.5	-789.063	-1531.88	-1002.08	-1051.09
350	-748.595	-1213.73	-484.174	-482.952	-719.494	-582.383	-628.379	-734.781	-585.935	-894.931	-330.503	-727.385	-425.898	-656.877	-1415.73	-1245.61	-2803.02	-765.492	-514.532	-836.994	-946.639	-419.305	-517.427	-920.204	-835.169	-1182.31	-579.936	-1288.13	-814.746	-532.517	-908.21	-1113.73	-1045.95	-1044.43	-797.565	-1025.98	-1086.61	-1344.13	-408.936	-758.466	-910.573	-447.692	-431.721	-455.663	-614.162	-808.831	-1106.25	-1104.48	-1056.8
355	-723.657	-1066.51	-548.736	-372.956	-694.013	-519.288	-1120.1	-616.52	-542.432	-881.804	-564.881	-656.48	-260.966	-848.412	-1435.4	-1144.39	-2565.67	-982.321	-458.667	-928.005	-921.12	-338.388	-705.537	-681.072	-716.146	-1120.29	-665.609	-1069.66	-821.266	-478.066	-401.175	-1006.61	-376.275	-1240.72	-741.596	-917.849	-718.607	-1247.77	-58.9426	-666.726	-955.666	-564.405	-41.2939	-587.667	-403.521	-418.487	-1141.23	-797.2	-747.855
360	-778.701	-718.654	-603.986	-459.288	-676.014	-551.596	-744.375	-608.004	-415.743	-803.432	-104.818	-288.772	-289.248	-439.729	-1171.29	-1080.78	-2204.42	-578.182	-207.162	-787.38	-893.378	109.037	-81.0844	-407.713	-645.971	-913.81	-490.936	-998.929	-673.598	-270.909	-519.026	-921.988	-585.611	-1099.83	-501.414	-896.714	-606.58	-927.475	-136.208	-539.8	-691.2	-283.331	-102.849	-647.667	-172.914	-628.406	-1147.27	-1007.61	-592.871
365	-859.185	-1073.36	-583.058	-355.018	-541.514	-759.673	-734.855	-424.374	-679.308	-575.288	301.69	-256.035	-479.613	-568.167	-1422.53	-1061.4	-2371.68	-662.871	-525.356	-852.639	-782.195	-56.4494	-407.715	-715.35	-734.961	-1197.49	-505.078	-996.798	-844.048	-574.042	-804.372	-1444.91	-465.832	-1026.18	-609.676	-732.045	-1071.65	-929.151	-379.24	-190.264	-1003.15	-262.238	-255.146	-356.211	-130.927	-717.493	-1171.9	-733.733	-790.032
370	-1046.55	-869.628	-583.19	-664.536	-808.223	-844.467	-813.629	-1003.16	-691.991	-808.76	-834.175	-588.549	-394.249	-597.967	-1409.31	-1012.89	-2710.67	-1053.35	-795.534	-751.19	-1206.54	-187.995	-332.592	-555.375	-803.564	-1293.09	-673.273	-1360.13	-882.296	-589.612	-872.847	-878.717	-966.051	-1165.31	-757.022	-1127.66	-1510.93	-1629.56	-406.393	-636.332	-1150.18	-851.431	-331.369	-704.5	-512.366	-1030.93	-1173.95	-806.875	-1086.72
375	-725.248	-1171.63	-642.312	-843.012	-791.878	-884.609	-824.613	-963.099	-190.548	-879.876	-331.755	-779.699	-170.685	-404.087	-1524.22	-1014.83	-2320.68	-769.635	-629.486	-595.639	-922.828	-211.441	-658.381	-686.007	-779.304	-877.267	-609.898	-1182.15	-922.236	-903.738	-700.338	-905.613	-685.772	-1079.02	-778.193	-1036.76	-1125.62	-926.416	-167.591	-440.048	-944.05	-853.612	-201.545	-851.711	-456.363	-729.838	-1452.11	-1151.57	-738.277
380	-891.584	-1059.23	-350.094	-779.654	-611.885	-848.307	-625.836	-585.104	-713.873	-780.328	-639.417	-648.911	-331.182	-895.065	-1381.75	-1105.59	-2550.71	-659.753	-475.194	-804.071	-933.575	-229.275	-422.123	-683.653	-975.176	-1147.97	-757.372	-1176.26	-816.88	-923.343	-983.428	-1321.22	-995.653	-923.242	-814.594	-1286.74	-1138.58	-1303.93	-267.182	-551.423	-951.43	-557.166	-246.986	-581.633	-461.905	-814.887	-886.88	-800.189	-1086.91
385	-1104.23	-1248.34	-477.529	-548.786	-1022.28	-993.41	-702.425	-1240.7	-910.285	-827.098	-782.602	-826.069	-441.822	-998.751	-1520.62	-1446.29	-2568.39	-927.616	-748.075	-1092.01	-1004.12	-502.307	-736.715	-1196.86	-877.506	-1376.04	-919.306	-1312.84	-1081.7	-1023.25	-1091.91	-1376.47	-991.624	-1435.97	-900.426	-1193.48	-1342.91	-1531.93	-578.431	-906.115	-1430.37	-1066.3	-727.775	-911.643	-378.303	-740.789	-1468.11	-1255.43	-1229.33
390	-1066.77	-1112.92	-483.029	-802.823	-768.65	-720.208	-1106.34	-867.14	-857.03	-557.61	-392.876	-448.706	-562.702	-836.002	-1597.98	-1229.68	-2619.65	-1010.52	-712.562	-1005.92	-1293.37	-457.917	-760.009	-993.52	-827.537	-1166.72	-707.457	-1433.81	-990.737	-910.427	-630.686	-1577.24	-586.208	-1433.95	-1198.81	-1275.04	-1465.46	-1535.59	-728.673	-611.448	-980.958	-768.21	-472.442	-776.919	-449.262	-1008.73	-1586.74	-1100.36	-1210.43
395	-1275.3	-1507.95	-764.633	-862.265	-992.353	-1003.3	-998.431	-1371.66	-878.738	-921.74	-753.635	-834.055	-606.227	-853.151	-1705.02	-1412.69	-2554.81	-905.76	-866.802	-927.143	-1433.1	-892.304	-704.678	-882.311	-1336.18	-1396.27	-938.495	-1425.14	-868.873	-618.616	-961.556	-1542.68	-1153.83	-1520.18	-1138.16	-1182.56	-1450.14	-1527	-538.115	-865.404	-1319.95	-1179.26	-718.909	-1074.92	-730.936	-884.803	-1492.96	-1259.97	-1111.93
400	-684.283	-1023.83	-367.695	-636.821	-664.979	-647.368	-610.946	-1002.41	-784.992	-647.964	-512.929	-716.451	-156.143	-661.294	-1348.58	-1150.94	-2470.07	-571.026	-490.194	-890.183	-976.029	-222.329	-635.089	-549.507	-805.304	-1168.7	-713.488	-1010.1	-739.891	-445.739	-690.646	-850.342	-114.787	-1140.36	-851.998	-1038.83	-1281.91	-1223.99	-901.34	-455.567	-883.078	-731.531	-445.355	-472.987	-353.546	-759.314	-1126.75	-778.247	-949.801
[truncated: 29 more columns]

## Sheet: DtolC_growing_1
Time (s)	1 bg subtracted unnormed	2 bg subtracted unnormed	3 bg subtracted unnormed	4 bg subtracted unnormed	5 bg subtracted unnormed	6 bg subtracted unnormed	7 bg subtracted unnormed	8 bg subtracted unnormed	9 bg subtracted unnormed	10 bg subtracted unnormed	11 bg subtracted unnormed	12 bg subtracted unnormed	13 bg subtracted unnormed	14 bg subtracted unnormed	15 bg subtracted unnormed	16 bg subtracted unnormed	17 bg subtracted unnormed	19 bg subtracted unnormed	22 bg subtracted unnormed	23 bg subtracted unnormed	25 bg subtracted unnormed	26 bg subtracted unnormed	27 bg subtracted unnormed	28 bg subtracted unnormed	29 bg subtracted unnormed	30 bg subtracted unnormed	32 bg subtracted unnormed	33 bg subtracted unnormed	34 bg subtracted unnormed	35 bg subtracted unnormed	36 bg subtracted unnormed	37 bg subtracted unnormed	38 bg subtracted unnormed	39 bg subtracted unnormed	40 bg subtracted unnormed	41 bg subtracted unnormed	42 bg subtracted unnormed	43 bg subtracted unnormed	44 bg subtracted unnormed	45 bg subtracted unnormed	46 bg subtracted unnormed	47 bg subtracted unnormed	48 bg subtracted unnormed	49 bg subtracted unnormed	50 bg subtracted unnormed	51 bg subtracted unnormed	52 bg subtracted unnormed	53 bg subtracted unnormed	54 bg subtracted unnormed
10	0	0	0	0	0	0	0	0	0	0	0	0	0	0	0	0	0	0	0	0	0	0	0	0	0	0	0	0	0	0	0	0	0	0	0	0	0	0	0	0	0	0	0	0	0	0	0	0	0
15	331.42	349.433	88.3326	307.94	-1.13307	-10.7314	-20.7991	147.152	141.177	147.525	-28.4622	475.082	55.7309	169.083	31.6622	258.488	34.9791	-120.426	200.25	230.953	-430.737	170.807	100.342	-381.95	-30.5395	363.593	224.728	-325.344	242.228	-282.036	-19.8346	193.284	47.6998	-77.1419	204.595	40.0681	303.728	215.117	87.7277	152.814	256.997	252.836	224.619	439.418	197.037	353.92	-327.195	222.233	51.8999
20	-98.7748	293.078	-31.6293	-61.4905	-97.8616	-222.671	-51.411	309.239	-210.698	-385.307	177.768	616.983	261.329	-42.9144	170.626	46.585	-104.266	-401.063	-26.8513	70.0249	-116.008	93.401	154.029	-112.096	386.973	354.897	270.254	106.595	-125.401	-461.884	19.2343	-87.5628	-83.8575	-288.366	-79.0303	-170.954	36.3093	197.934	83.5334	176.438	27.0819	-326.644	-178.718	-91.0568	-82.7675	83.8855	-68.4844	217.906	-106.369
25	53.8248	593.383	41.8395	119.549	237.235	-74.9512	174.578	262.664	29.244	127.479	101.836	742.099	168.915	-96.2753	-92.0196	183.458	115.643	-72.1389	-5.81027	149.093	-91.2885	122.894	-11.2136	-162.03	359.388	323.345	148.894	120.481	107.731	-202.389	43.1715	-67.5209	-38.5192	227.217	92.535	-57.5	115.892	63.198	-50.3284	101.855	387.124	-64.334	21.7836	-24.7651	-98.3584	332.657	118.934	49.0432	21.3693
30	276.598	158.263	17.6101	232.237	82.4076	-507.392	87.1426	6.23212	36.381	-104.807	-45.5363	343.914	93.3139	-221.235	23.0456	182.787	175.551	-2.1853	236.657	125.198	-83.6572	93.2149	67.0666	-285.038	341.645	246.722	189.623	153.985	122.935	-203.926	56.6093	83.9482	93.483	-57.3111	-13.5183	-88.3101	137.543	298.108	-288.357	179.288	125.899	305.665	287.982	160.405	191.602	211.084	106.27	116.881	52.8609
35	351.224	484.789	251.479	214.599	246.98	-416.85	410.816	564.91	394.721	146.222	403.894	291.845	226.131	51.6206	345.403	562.314	216.291	-307.956	377.784	442.433	30.9127	482.577	450.064	-170.016	882.439	675.878	487.297	83.0583	88.5904	-126.65	100.649	253.696	191.48	23.7672	401.984	-16.0601	339.766	265.69	13.9138	312.872	176.174	210.897	-58.1209	192.876	327.49	414.604	272.581	-19.4605	332.563
40	410.067	484.976	209.597	-14.6192	118.621	81.1966	344.662	146.544	595.019	255.691	242.602	349.734	242.126	110.964	362.012	97.4926	123.659	34.8638	298.913	444.929	82.7989	157.142	402.387	150.233	506.564	329.785	494.521	307.039	52.2105	-6.99179	329.049	182.079	96.2794	217.994	216.043	222.029	245.793	331.565	17.8387	185.464	129.654	-29.1636	211.975	434.596	295.667	404.624	185.196	142.202	268.249
60	259.467	464.02	-0.90621	286.195	99.7955	-388.615	326.768	347.687	293.457	-212.155	25.5066	435.851	249.104	110.102	188.833	325.241	130.102	-42.0419	292.148	464.814	176.785	332.551	413.758	-364.637	608.127	545.411	478.085	337.406	306.694	-141.497	201.193	79.3896	424.636	149.923	-69.6813	-352.828	157.448	149.461	-123.467	373.692	357.59	333.238	195.782	205.418	428.769	443.363	121.629	174.434	167.489
65	-132.417	190.478	-153.457	44.1562	-57.4714	-503.851	-74.6128	17.6282	-31.4493	-98.7049	-277.71	379.362	118.005	-147.184	-70.7036	-23.5513	-35.3012	-187.905	-21.6607	147.078	-153.857	36.4237	72.176	-107.62	40.6977	131.627	45.4674	-345.445	-195.419	-402.092	-66.2317	-13.811	-48.7055	-63.3642	-108.877	-579.228	-44.1	41.5502	-258.25	-3.33524	-162.238	-302.966	-294.625	99.0251	59.294	136.329	-53.8552	204.21	-201.96
70	353.987	474.244	24.8997	162.539	319.395	-450.821	233.068	338.898	431.927	519.377	-55.2045	612.59	193.858	135.73	218.698	334.897	344.032	-314.192	167.35	369.442	207.217	186.889	299.916	-95.4419	441.025	259.115	445.28	69.0074	199.862	-145.263	429.367	-151.229	134.662	210.329	173.995	-241.259	346.295	226.114	-202.431	78.3949	115.213	367.061	178.635	350.364	239.781	162.356	18.4716	15.7439	84.3568
75	321.561	322.74	1.26209	202.191	171.121	-486.862	140.412	174.844	292.073	210.069	-94.1148	504.783	222.309	29.8568	-50.2503	229.631	81.5802	-259.681	11.4602	286.969	172.963	169.654	458.211	43.0727	285.723	340.787	65.9788	-23.2161	76.4913	-281.506	129.795	-74.1106	179.742	-194.295	180.363	-550.674	130.042	-70.9026	-242.256	85.6252	-12.7476	99.7278	-28.7928	91.9682	153.303	51.297	8.42857	204.312	57.7212
80	339.08	449.27	16.3962	153.359	161.374	-379.63	88.3212	283.443	289.06	-278.535	84.7587	519.13	-77.6915	63.0701	138.271	114.668	214.816	-82.2222	-61.7984	168.772	-101.512	78.0866	446.538	-32.7755	438.241	543.496	39.1742	-189.3	217.198	-207.247	114.627	140.621	-150.179	328.765	101.05	-321.419	202.991	161.804	-143.732	66.4703	31.4975	-32.4663	-379.802	579.568	329.812	98.2673	43.4998	249.721	-188.485
85	254.769	522.525	9.03394	170.158	5.11693	-507.387	-88.1967	486	120.032	-115.309	89.0855	662.304	319.734	66.5052	41.3863	215.586	298.757	-39.0248	-98.0625	46.1138	263.925	398.499	399.423	-20.3019	157.398	17.757	392.965	61.3917	295.514	-308.536	72.0517	12.4667	241.73	335.15	95.6499	-394.812	275.838	206.914	-460.153	280.246	-132.893	-65.9828	91.4304	-151.77	265.517	283.674	26.1191	-41.2538	40.3472
90	-23.4093	51.9871	-91.4705	-194.383	-241.503	-607.519	-252.901	69.8067	10.034	-451.045	-173.596	296.879	-188.317	-336.306	-415.031	-156.099	82.3579	-471.891	-78.5844	-52.7945	-113.49	-101.395	-208.814	-435.419	44.5695	41.4273	-91.0859	-311.3	-202.666	-536.793	-146.572	-333.567	-249.684	-162.17	-167.289	-563.13	-65.969	-187.438	-535.064	-67.2628	-244.046	-64.02	0.74089	-206.617	-61.8818	58.1225	-224.775	-235.277	-459.882
95	168.659	519.584	67.3579	138.413	43.5991	-542.408	26.7398	238.158	446.791	-19.4167	-58.6558	928.061	192.823	-288.067	144.14	205.537	0.69395	-312.942	74.636	139.028	130.198	473.04	262.461	-70.9879	101.155	416.637	76.3393	-47.1963	-208.962	-204.005	43.7863	94.1533	125.322	13.2932	-65.2894	-228.244	210.38	79.1207	-361.865	340.916	173.084	285.813	351.587	-64.6318	444.112	394.863	-246.986	246.413	-69.8923
100	51.1508	198.603	-235.774	-335.772	-249.19	-757.002	-88.0495	56.246	110.444	-410.7	-233.27	714.059	-157.629	-243.528	0.62595	156.046	-232.872	-244.252	-231.004	54.6731	-67.2935	112.56	-179.47	-219.941	-48.1876	254.988	-24.4508	-219.983	-219.521	-514.536	-174.943	-174.962	-68.9581	-156.633	11.5906	-807.14	1.76594	-104.31	-363.954	-18.6495	-185.17	-23.7393	-335.418	-296.256	204.489	-50.3991	-310.833	188.923	-113.066
105	114.659	384.874	-218.041	22.6172	90.8838	-435.056	74.5801	248.97	353.086	-27.5119	-81.875	710.659	103.78	-265.868	103.786	324.433	174.398	16.3215	127.527	242.099	-122.204	59.2477	363.412	49.4484	133.309	160.866	-125.52	-154.252	-82.7865	-268.443	5.60769	-56.172	73.4801	-220.533	322.703	-287.132	158.075	191.315	-254.52	184.287	-170.21	-18.4677	102.153	79.0325	178.007	76.9784	112.841	-13.8867	124.093
110	200.738	318.321	0.9811	-347.679	-34.9265	-697.727	-119.639	318.668	305.832	-198.917	-208.812	599.605	0.50143	-198.59	-35.1354	120.794	-12.043	-347.189	-35.3841	-42.6268	13.1489	98.4616	-81.2055	-413.743	324.727	226.611	40.1028	13.4939	-100.838	-367.414	-92.8312	-37.3574	-84.4727	-308.457	108.825	-439.085	195.583	186.768	-361.749	56.6388	-57.0179	-40.8111	14.3376	-198.396	164.108	105.366	-151.485	-12.5233	-286.401
115	104.385	411.003	147.261	60.4195	11.6418	-508.934	-2.84603	130.622	287.784	-250.674	-152.504	651.636	434.533	-19.8336	-188.837	142.534	297.552	-145.686	24.4609	210.966	158.82	215.167	206.823	-71.575	196.248	363.036	126.237	-162.365	-18.9627	-141.017	4.49433	46.3114	-21.763	84.9944	109.682	-337.868	334.374	213.898	-358.162	155.275	-183.405	-235.577	111.512	160.422	543.527	214.197	223.393	230.643	20.1395
120	2.72024	430.506	-230.602	-161.844	19.7899	-216.989	47.6694	149.031	-0.34176	-88.8214	-41.7824	863.637	155.838	8.55604	-56.5206	57.7329	215.205	-66.3261	-62.0527	6.72511	237.598	10.7488	221.142	4.50408	236.205	304.43	14.8647	166.161	84.781	-309.353	131.885	-74.8565	-230.5	-61.3681	-48.6825	-347.208	218.236	47.4639	-462.199	89.146	123.119	39.4778	-88.6365	252.953	-36.9052	89.8414	-233.338	-163.69	-134.556
125	-130.415	395.324	-133.158	-31.5155	-101.789	-135.225	-29.4824	88.6059	277.978	-316.979	-569.538	497.84	153.807	-138.287	-282.485	278.46	42.7131	-435.27	77.8113	98.9655	34.4519	160.888	68.7566	-8.34844	168.493	119.897	41.6042	7.08333	187.325	-451.272	112.687	128.41	-222.101	-209.443	33.9027	-440.886	133.621	99.2731	-344.714	-18.2537	118.328	-204.543	-158.562	76.634	-106.984	208.772	-395.456	-174.433	-325.144
130	-11.778	217.123	-126.667	-181.738	-496.498	-148.333	94.1862	31.3342	1.43077	-57.2548	-225.25	431.121	31.5452	-193.339	-86.4289	126.914	-250.556	-313.76	-230.53	91.4774	-91.3635	186.603	5.41337	-66.0726	148.338	66.0171	-67.7576	-211.421	-280.806	-526.678	-332.985	-178.941	76.4435	-93.487	-225.005	-630.179	-10.3312	3.53162	-248.682	-64.74	-63.0074	-380.79	13.4947	-233.432	201.94	147.206	86.3234	-61.2642	-50.5718
135	-110.698	125.711	-343.897	-302.368	-341.586	-616.886	-327.541	-323.815	-232.343	-371.538	-421.018	297.485	-164.967	-370.44	-533.911	-326.226	-74.9174	-588.94	-244.926	-86.6775	-492.768	-262.563	-199.663	-301.504	-102.503	-82.3547	-153.307	-380.842	-348.893	-907.05	-244.569	-323.228	-263.252	-141.982	-108.567	-716.107	-12.0224	-169.336	-794.221	-336.401	-298.098	-334.764	-408.439	-232.452	-107.997	-136.105	-508.687	-219.306	-472.813
140	-128.509	219.78	-383.476	-180.331	-320.862	-583.307	29.8926	108.191	-12.6227	-450.897	-258.228	493.757	31.5568	-288.251	-14.6749	-45.5324	29.3942	-124.486	-98.3906	-123.071	-70.3179	-184.942	-213.337	-249.158	73.1602	90.0785	-179.49	-238.662	-35.5679	-452.897	-109.869	-157.662	-28.0048	-230.183	-133.283	-523.971	183.218	85.2329	-68.088	24.7905	161.011	-419.172	-147.62	-41.0689	-92.8079	54.6681	-264.205	-50.5888	-158.745
145	152.716	363.456	171.931	-36.5257	0.24024	-476.86	-19.9824	-6.08453	213.029	142.052	-305.391	538.954	134.84	-95.4605	-384.081	58.061	11.8436	-110.028	-100.507	-52.0217	-11.419	163.51	244.794	13.3758	374.247	175.985	14.7549	-91.3028	30.2166	-381.642	-33.9038	-185.011	-140.258	2.64444	39.0201	-198.132	111.186	66.3043	-230.242	311.693	186.903	-40.5275	-30.1767	108.585	-31.7751	41.3484	-79.4319	217.658	-185.807
150	97.6265	237.448	-50.1662	-196.129	-115.644	-826.905	-164.755	67.2597	198.561	-268.111	-212.159	732.907	45.9234	-175.241	-195.341	7.09123	6.26566	-298.075	-67.455	110.328	13.5065	24.2763	82.5108	-229.117	102.01	107.474	92.0093	-199.633	-10.3523	-312.453	56.7826	-52.466	-60.1411	-329.891	-132.307	-683.516	22.7776	133.228	-323.017	103.398	-185.053	-58.3581	-71.8428	27.9761	15.9786	139.652	-213.469	-57.7096	-187.018
155	180.616	238.876	158.797	44.7172	-72.67	-838.365	-145.969	257.06	124.775	-113.755	-223.032	701.239	145.07	-84.5423	-12.5918	-35.913	-201.84	-426.407	79.3984	-99.3443	-83.4881	74.2145	21.8921	78.0192	234.695	86.7206	-90.9508	-26.8797	-159.56	-610.063	104.694	-117.774	-116.391	-219.329	-180.439	-621.379	-5.85269	-40.8974	-345.832	146.122	-166.532	83.8278	-204.19	-279.468	-95.8257	-43.9973	-167.97	133.219	-194.581
160	260.134	262.206	-0.46211	-192.052	-72.5277	-612.072	-151.42	199.396	157.255	-70.998	-153.363	841.679	98.0259	-92.2122	-356.025	-50.87	-48.8572	-231.631	-19.4565	-128.352	-226.976	87.2658	252.489	-123.484	307.454	36.5981	-151.406	-207.633	134.486	-130.765	-182.176	-82.8955	-30.9675	113.881	40.8667	-502.571	-100.876	11.5599	-70.8027	79.0398	-49.4762	-37.1389	-36.1204	86.1877	-284.735	18.3086	-1.67659	108.613	-263.658
165	20.0489	224.578	-75.0992	62.144	15.5351	-502.627	-221.318	60.5871	97.7483	66.6667	59.7969	687.716	20.4057	-65.0008	-335.585	47.582	-37.0048	-181.175	-153.885	89.136	-175.28	42.9457	-139.975	-89.7965	83.4195	59.1223	-141.335	49.5487	59.6246	-347.121	85.7321	28.8824	-135.386	-63.0056	-60.1794	-587.257	135.991	148.202	-535.984	-101.054	-2.57964	-204.46	61.4912	-42.6485	-56.4857	235.461	-472.408	23.9266	-233.105
170	415.044	375.494	87.4467	141.061	113.547	-636.435	182.359	432.899	32.3316	242.612	-174.641	665.275	333.101	-62.4086	-156.191	155.833	94.3775	-380.167	178.63	279.733	148.804	242.249	169.732	-275.779	246.771	493.58	177.32	173.9	50.7691	-59.4233	287.79	-144.983	-3.61674	31.1098	144.803	-161.769	424.696	92.9385	-285.951	193.636	240.616	-8.96768	102.861	88.049	81.2226	249.714	-177.318	-27.4399	213.652
175	9.55648	267.983	62.6736	89.5076	75.3134	-557.843	28.6787	284.197	270.771	-132.649	-167.982	703.929	-28.1785	46.3229	-222.052	44.1911	-56.4926	-78.5935	76.8026	-94.513	197.077	365.887	26.5824	-106.991	437.7	172.628	198.314	-173.454	-196.215	-362.586	30.6368	-64.1863	119.156	-2.71208	205.711	-454.189	100.436	141.248	-109.914	194.5	-82.8429	315.174	-148.939	48.8003	-131.234	247.028	29.8494	-348.662	5.74405
180	65.6138	119.404	-195.022	92.8027	-299.373	-894.655	-188.754	-235.924	-112.036	-19.9638	-308.152	737.922	-28.7841	-169.009	-279.408	71.7184	-108.311	-275.463	-85.2526	-178.513	-21.4138	33.1957	-8.07609	59.8696	85.7708	159.486	-56.6833	-219.563	6.4483	-534.002	-164.893	-158.046	-209.231	161.188	-126.514	-325.516	170.527	-108.946	-333.271	-44.8192	44.753	-418.633	169.606	3.49465	-301.854	-147.581	-373.937	-398.189	-156.207
185	44.6094	306.14	-56.1188	-143.483	-83.8712	-359.869	87.7188	26.5441	92.131	-52.3333	-293.194	522.523	134.035	-272.748	-222.135	182.765	-261.428	-225.808	190.063	41.9733	-13.5769	96.2279	49.1739	-38.5583	-172.764	220.346	26.1496	-100.262	1.73303	-716.109	76.852	-297.94	-116.498	181.778	46.2939	-518.186	154.257	104.728	-217.28	83.6076	-55.2725	-264.953	-224.698	-12.0682	53.6202	43.3337	-126.323	-157.732	-27.7292
190	212.725	204.499	66.4385	-35.391	-28.1033	-535.933	-113.571	120.545	287.615	124.217	41.0865	579.113	61.5696	15.2144	-109.197	78.3889	-24.8112	-494.932	-61.2059	80.9901	-111.734	283.935	54.4066	39.0541	12.4838	64.5992	146.014	-436.504	12.6081	-501.544	25.3416	-143.958	-34.9562	-287.406	-125.792	-312.769	178.557	10.9612	-244.268	-35.8277	74.378	47.0237	-218.12	-105.447	59.0393	53.4424	-424.889	-13.5022	-138.814
205	163.929	729.618	-115.012	98.2741	-139.489	-402.438	93.0561	288.939	186.743	-74.7304	134.125	419.162	295.348	-82.1479	17.6318	75.5707	90.3453	-373.615	271.396	-19.2616	88.7655	110.227	-53.4306	-125.6	244.451	245.125	213.263	106.017	-4.80593	-204.786	221.646	97.2626	-109.918	51.068	594.871	-45.8631	295.107	140.4	-250.476	413.321	-69.8362	-13.7079	116.983	330.912	-72.7153	16.2033	-166.136	-13.6002	-280.44
210	272.222	472.19	41.1895	145.108	-83.8239	-530.371	136.347	149.133	-19.0655	83.836	176.685	990.717	344.64	-228.41	-11.5325	68.1602	58.7468	-155.54	95.8038	-24.7981	151.547	139.918	151.968	-137.792	301.639	280.271	-144.63	-427.767	113.142	-178.936	-0.71425	145.249	-151.356	56.4791	-32.4638	-535.935	91.0474	176.143	-32.175	368.406	158.524	-87.104	116.538	39.9582	-107.49	69.8661	-216.172	66.3008	74.3479
215	119.84	529.313	84.674	14.9981	31.8272	-351.638	-87.1975	63.2838	25.1947	283.969	-55.0583	518.913	37.2152	-63.6258	-44.8196	156.278	-185.121	-475.301	-139.62	45.4744	-57.3678	118.139	-31.0454	-15.2556	9.71717	96.6363	-42.6248	-108.791	-184.374	-312.902	100.804	-35.6565	-163.403	-113.736	-91.3613	-435.631	-87.3173	139.217	-319.876	103.533	-205.762	-46.2722	-71.291	114.406	-173.552	87.7642	0.83847	-218.161	-151.488
220	126.024	222.91	22.4405	211.744	-57.4267	-431.31	28.119	192.907	159.392	34.75	102.175	856.86	203.821	-166.255	289.16	200.705	-102.954	-319.027	-28.6967	0.81062	24.1712	77.9873	46.8621	-129.073	76.5954	36.9772	114.142	-256.757	191.356	-203.322	-116.151	28.3317	-99.3511	-48.3237	270.65	-180.71	314.077	181.304	-178.981	336.957	31.9944	-117.506	-194.571	265.743	72.2013	278.986	-131.326	-30.9356	-231.1
225	107.385	246.02	-147.62	-149.517	-293.187	-508.011	-168.232	193.674	120.777	-126.019	-92.6806	364.603	-70.7946	-195.353	122.627	54.2315	61.0802	-237.782	29.759	-236.026	-54.3017	39.1038	-139.611	-118.31	-1.10867	279.631	-241.576	-215.031	-323.124	-273.733	-191.198	-87.4682	41.3892	60.9224	-161.258	-375.058	79.4303	2.10259	-509.101	285.991	-169.605	156.003	-115.368	106.037	-156.284	55.8347	-81.912	46.6994	-132.45
230	310.827	231.139	-209.481	-54.8828	-81.5316	-647.296	-190.537	-16.8494	135.921	115.068	2.09167	502.491	-33.3386	-118.153	-100.306	78.1444	-106.739	-199.335	46.3464	185.842	-363.548	186.533	153.798	-38.6762	252.037	461.421	-190.946	28.1625	34.1312	-86.5675	-42.9431	52.9571	139.777	332.356	277.771	-113.752	69.25	105.277	-146.647	426.408	171.31	25.4895	-255.105	340.063	-83.795	197.996	-126.987	-432.81	-134.296
235	126.79	93.0392	-67.6058	41.2098	-134.062	-650.178	-176.061	-15.1518	235.105	165.757	-133.105	596.357	56.5243	-121.929	-4.36103	321.183	-112.355	-294.161	102.748	126.52	110.801	82.5685	-19.1713	181.05	62.8996	222.751	102.443	-319.668	96.9205	-242.732	-19.1967	27.2534	-27.626	-183.743	292.525	-251.22	171.458	187.106	-339.963	212.54	19.781	-125.556	210.137	410.39	64.9511	143.658	-203.334	196.457	-257.001
240	149.429	173.039	-172.723	-79.1729	-152.856	-679.847	-310.124	-136.2	-42.7784	-228.667	-283.285	224.652	-145.781	-65.3864	-538.371	-9.87536	-233.283	-407.455	131.17	-291.626	-292.111	-97.0856	-240.414	-160.578	93.2141	180.778	-130.632	-237.538	-284.604	-444.217	-343	-327.6	-211.454	-300.299	-294.073	-355.286	-149.136	-176.648	-334.982	4.5772	-10.0659	-24.471	-257.935	-39.4369	-267.941	-224.698	-446.573	9.71634	-362.727
245	-2.66626	151.503	-133.113	-316.637	-328.15	-718.129	-116.668	-238.609	-151.648	-415.383	29.7	378.871	-171.042	-323.193	-306.455	-38.1138	-5.91772	-344.352	-114.054	-154.267	-199.847	-239.085	-206.875	-134.331	160.255	24.5873	-192.526	-420.744	-178.324	-507.167	-88.6394	-210.809	-171.285	-343.629	-138.782	-496.634	-220.415	-27.0649	-597.521	-52.4746	-310.165	-280.329	-239.523	-82.1057	-180.687	-111.506	-358.961	-349.899	-356.642
250	333.566	545.756	208.432	195.747	-3.34596	-349.944	203.996	117.546	414.578	58.6341	44.1972	719.066	166.31	-17.083	-204.433	553.838	325.525	-342.436	354.168	47.4138	87.5133	449.335	171.48	246.155	440.973	468.676	11.21	201.552	-289.89	-117.995	206.29	-127.173	6.28889	39.0893	265.596	48.3831	422.877	361.646	-342.184	516.071	-21.9449	14.7517	-101.079	291.114	216.923	206.336	-476.521	323.067	-58.1702
255	186.219	274.752	-267.257	-79.9701	-287.157	-935.921	-161.681	-27.3172	50.836	-358.917	-127.708	207.588	-34.2969	-291.518	-174.085	-82.4907	-165.259	-445.087	-219.752	19.8122	-164.919	59.9888	-101.91	9.39459	-169.33	212.712	-71.0558	-208.957	4.54129	-274.989	-208.725	-190.899	-147.967	-177.819	-99.8272	-523.477	-71.7048	-9.90533	-61.7309	37.4148	-67.0275	163.828	94.2614	114.184	-121.732	180.105	-353.352	-68.1085	-174.221
260	85.8647	295.688	-18.2874	-171.176	-76.268	-231.647	39.9343	223.247	213.726	-86.5449	-298.153	499.279	-14.3737	-296.463	5.42309	309.622	59.7478	-209.779	-28.8847	-52.2112	-188.204	221.458	-56.8142	-88.7455	398.684	304.155	-39.299	-108.719	-29.9632	-202.141	-62.8462	-198.962	-173.877	-217.037	6.11616	-384.314	-104.748	-71.3957	-400.721	231.425	-301.219	-43.9087	86.3635	21.8182	-4.83934	66.582	-305.996	10.9962	-4.29483
265	-72.4524	-32.5689	53.2178	-102.837	6.79442	-285.406	-139.651	-19.3556	17.1009	-366.228	-97.6389	667.481	-10.7893	-371.621	0.21458	107.171	-213.768	-475.461	-36.7299	33.0918	-133.303	-125.55	-16.0892	-145.031	-45.4141	300.011	-118.115	-207.594	-312.501	-460.566	-76.827	-180.356	-20.0755	-231.3	76.0833	-561.405	-24.3587	8.87101	-336.924	91.6433	-263.285	-284.062	-325.514	80.5874	61.1597	-84.7605	-243.186	32.1818	-312.504
270	285.106	227.58	83.777	151.886	-10.6597	-237.282	33.5465	40.2295	2.88588	38.7	-219.228	697.769	177.657	-201.821	228.157	47.2031	-30.6198	-299.702	-9.50247	92.5619	-217.817	170.532	-7.72124	-106.89	-18.076	416.645	25.5734	-148.472	28.801	-249.411	128.585	-116.889	-41.6926	-241.592	430.501	60.3143	27.2743	133.241	-414.599	217.302	-220.601	-103.14	155.492	181.923	-147.859	86.5469	-87.8431	288.912	-132.89
275	18.9518	280.496	-92.2236	-106.851	284.327	-173.827	188.083	47.0269	-246.556	-325.646	930.92	427.073	134.519	-133.068	-55.8389	170.577	89.0155	-477.863	-144.189	156.553	-151.274	-350.295	69.8108	-333.974	122.37	244.987	103.439	-111.428	-72.6144	-276.55	213.135	-303.105	-115.342	-321.469	113.852	-575.281	32.4254	95.446	-287.294	33.4439	83.5119	-321.355	5.2614	144.307	-82.6602	119.382	-181.486	-110.937	-250.179
280	153.769	9.8514	-104.553	160.605	91.3481	-276.871	-9.68031	1.23662	134.872	-294.131	-161.792	504.34	-16.9641	-157.863	6.68731	-28.635	-219.777	-704.305	-161.693	30.8728	-211.888	11.7353	79.6819	13.5941	116.411	-62.3529	24.7313	-446.9	-53.524	-436.601	-150.537	-113.728	65.3286	-315.744	84.5497	-464.801	19.8941	37.8213	-382.599	4.50542	-28.1949	-99.6566	-220.391	281.042	85.3429	-21.5223	-348.446	-215.793	-390.396
285	-142.321	129.649	-102.744	-57.0247	-215.068	-601.666	-301.022	-110.288	-345.885	-295.765	-402.514	611.585	-110.361	-429.871	-221.965	-74.8122	-243.426	-339.279	-160.377	4.93231	-143.539	-177.415	-52.6941	-160.568	214.727	7.63602	-123.722	-489.769	-214.44	-484.364	-322.707	-167.319	-227.24	-451.471	-123.147	-447.426	203.246	-177.885	-694.552	-12.7204	-302.872	-101.732	-91.2325	-1.85529	-149.022	65.8167	-495.069	45.1341	-233.486
290	248.929	467.066	-8.99267	118.923	27.7784	-896.687	-239.77	157.069	99.496	-141.825	-424.694	818.283	-79.3168	-70.8858	-55.1245	305.434	-137.613	-461.444	-65.674	-62.3589	-201.985	383.978	-13.8618	-60.7769	388.525	152.112	-60.54	-294.294	62.6698	-271.447	71.0363	-108.129	45.2272	-48.0368	33.7077	-94.5881	144.1	-103.168	-420.264	379.558	171.232	-52.4222	96.7409	351.623	35.6821	39.5976	-13.3685	93.9283	-176.471
295	-180.379	196.828	-58.9308	-168.519	-241.231	-529.167	-80.3924	119.655	-126.7	-298.306	-330.646	356.036	-224.599	-319.852	-0.55647	-111.103	-174.083	-301.835	-348.506	-158.323	-163.133	10.7763	-251.659	-188.289	-204.072	71.0397	-186.74	-251.869	-65.6047	-949.058	-175.814	-279.778	-140.65	-228.962	-189.541	-282.49	79.0899	-108.932	-427.392	-116.727	-201.349	-79.5092	-141.25	-5.24216	-67.9158	59.1211	-510.768	-226.294	-432.31
300	236.746	479.628	86.9547	-331.142	170.257	-716.092	-110.838	-23.3026	189.587	-257.877	178.575	345.866	13.3849	-211.317	66.02	-57.0942	-159.96	-437.467	153.028	-157.155	-231.084	-82.4273	141.694	-353.908	89.742	186.894	-136.342	-92.9833	139.347	-505.762	-40.8485	-179.726	-175.565	-100.471	145.547	-161.457	-1.87564	197.227	-345.175	43.5739	54.5571	-180.067	-43.1053	375.059	-44.9227	-12.3509	-266.87	-76.4926	-225.308
305	-53.5927	52.4772	-43.6148	64.3906	-70.2057	-912.014	-303.641	-0.04375	396.101	-213.224	-392.415	380.881	-4.31815	-317.775	-35.4195	-90.1677	-59.7062	-389.405	-81.449	-149.062	-213.863	-23.9495	-72.3082	-275.2	8.86162	-15.6341	117.196	-79.6222	-277.098	-446.225	-172.267	-363.506	-59.1394	-398.854	-281.639	-692.479	113.148	-67.7711	-395.126	207.478	-220.31	-146.119	6.4332	146.14	274.7	-94.7685	-158.601	181.834	-314.763
310	143.882	143.485	153.85	22.7716	-68.0902	-557.277	146.212	81.3443	98.5464	-217.111	-590.506	749.729	103.558	-254.125	49.1727	87.1238	172.397	-181.024	-5.26563	-80.3458	-19.8814	28.5005	78.9241	-81.5621	-167.944	236.706	-362.201	145.996	-35.9293	-459.87	100.138	-116.571	59.3423	-402.867	-61.5644	-446.734	233.904	-187.327	-160.458	93.3121	-230.511	-414.399	21.5172	442.54	411.877	-82.7945	-133.741	132.599	-266.596
315	123.266	446.276	-76.7226	-43.1698	-39.0362	-546.761	95.5645	-11.3857	-30.0664	-173.528	-132.325	716.179	188.969	-154.62	-79.9907	87.7288	66.152	-381.085	2.39347	141.551	-162.676	14.0114	-7.71338	190.73	372.728	457.931	35.9054	-259.309	249.549	-257.215	-108.814	-108.034	134.207	-58.3528	323.508	-805.017	123.423	337.938	-248.842	303.646	-64.7095	-160.422	-10.9899	290.27	425.932	537.624	-128.76	-24.2742	-141.908
320	-148.268	233.436	-10.2	-133.239	-203.509	-767.719	114.136	87.3828	68.5	-377.226	-97.2379	372.845	-13.112	-235.402	-520.004	146.421	-177.132	-297.487	-36.8477	79.1683	-252.521	-248.52	-170.635	-224.9	-247.049	23.4653	-10.7532	-283.216	-183.528	-640.198	68.2368	-147.441	-181.714	-387.056	4.31642	-279.429	295.46	-22.4356	-266.33	120.6	-400.582	-388.483	19.4923	80.1243	224.932	-59.8453	-120.391	159.331	-344.08
325	4.2619	637.007	39.5014	53.7005	-252.734	-467.475	-209.246	224.683	138.054	29.3229	-97.5972	668.064	141.204	-60.6389	-73.8641	61.1725	-192.497	-338.294	-94.0607	102.084	-11.9528	78.5491	225.119	-251.151	136.343	410.132	-13.6836	-361.789	54.0741	-375.506	34.4868	-179.576	-166.371	-416.322	-114.096	-251.007	13.9474	130.693	-293.045	124.729	-338.07	-369.015	-91.9767	392.022	289.286	100.662	-320.621	153.206	-14.5854
330	-131.78	10.2538	-45.0453	0.23624	5.13066	-755.532	431.893	-94.9403	54.1422	-264.781	-674.234	565.562	158.676	-252.01	-311.497	-0.69482	-151.356	-541.421	-78.5312	-76.6372	-232.038	42.577	-31.1437	2.64091	267.899	134.23	-62.5975	-73.8301	-412.759	-292.599	143.972	-173.586	-273.046	-67.8849	-28.7136	-489.5	79.281	142.888	-254.73	189.587	-176.738	14.7875	213.449	261.434	41.2714	104.198	66.2786	-328.338	-306.232
335	385.326	671.444	56.8215	251.511	29.8318	-566.313	159.188	-66.9109	94.9826	-327.63	-222.866	771.57	309.085	-92.2616	38.3051	410.389	108.559	-397.031	-32.5109	-23.4164	-111.183	-48.8717	-7.30311	26.9364	122.27	339.347	131.924	-176.772	0.09685	-363.086	-94.7937	158.211	-112.713	62.1849	-156.537	-4.40893	23.0544	177.989	-417.697	69.1193	-329.548	-42.3151	-38.1214	205.19	25.2248	314.456	-177.499	347.888	-159.708
340	114.241	156.364	61.6783	178.81	-233.341	-1071.78	-305.624	63.0818	70.7	-147.863	-51.9093	555.091	16.6761	-290.502	55.8107	164.551	19.7006	-204.692	111.713	-96.6104	-65.139	-107.931	-88.0283	-76.45	195.982	333.876	-84.7388	-208.993	-76.0008	-425.11	104.439	-276.904	-107.727	-301.131	-24.1686	-237.453	-2.25686	-0.61477	-300.625	-27.9133	129.319	-282.561	0.2721	232.013	-215.475	20.1772	-224.315	67.7353	-388.445
345	29.5557	-140.911	137.783	-122.15	21.4106	-574.624	-259.555	-50.6332	228.153	-398.367	-449.738	604.922	-32.2243	-196.406	-237.258	257.075	-195.868	-330.701	8.90602	73.3138	-134.492	-166.784	-191.447	-118.825	73.7875	-22.5302	-81.6851	-366.133	-53.4309	-232.145	-126.7	-117.964	-253.333	-224.074	-8.32175	-293.85	-116.505	-37.8207	-485.351	239.169	131.929	-138.172	-12.5104	227.77	-15.9465	-31.4013	1.533	-216.33	-204.5
350	253.449	-77.193	229.374	230.992	121.899	-754.988	29.3257	33.2529	254.108	-5.00758	-215.642	796.988	197.113	-19.8274	-38.8854	173.907	-113.886	-343.08	74.7696	57.3875	-99.0858	233.845	27.1131	81.175	354.368	279.421	-213.576	-136.54	-54.3523	-74.9487	233.255	145.305	78.0647	-447.016	194.509	-385.128	-42.84	97.6867	-165.391	1.53273	-356.921	-168.019	98.7183	602.386	-226.704	18.5255	-127.027	298.53	22.2202
355	-39.8346	118.99	164.436	166.477	91.5922	-911.767	-7.28239	-19.1127	156.091	-53.3857	-132.607	475.979	138.802	3.23776	-167.229	45.882	39.8603	-334.703	112.82	23.5099	-166.04	-47.6965	-177.967	-253.795	228.152	70.1559	1074.56	-601.796	-239.068	-325.551	-70.512	-347.559	-75.3951	-427.042	48.9981	-452.122	-203.661	84.256	-296.417	55.2153	20.7674	-317.487	-127.163	-109.13	-208.979	-73.3145	-193.507	156.16	-134.226
360	326.247	65.6578	78.9923	238.939	125.732	-719.148	-106.151	117.31	84.2798	-86.9109	-180.772	581.721	271.881	-194.251	48.6896	20.8307	-56.437	-127.124	17.5391	0.51183	-213.148	19.132	-19.4526	-296.219	406.482	44.0406	1468.12	-443.63	24.5368	-451.264	110.315	-359.931	-181.793	-321.672	92.6826	-324.832	-11.3946	142.943	-190.278	32.1697	-245.598	-154.288	-35.6767	189.552	-88.9663	158.214	-291.38	-148.237	30.4028
370	292.838	259.736	381.92	205.724	204.042	-495.165	75.4055	-35.4403	326.745	-4.94697	-86.4511	1057.48	489.984	-109.828	15.936	125.107	-56.5013	-322.301	-22.1147	-76.7112	53.5373	-209.995	-267.899	69.7914	164.484	268.111	111.113	-307.924	-28.7436	-441.836	22.6561	82.8679	-158.718	-174.634	32.6417	-492.34	140.571	227.768	-534.527	367.764	-240.421	44.0278	-24.7025	290.506	25.0943	91.5605	-654.182	70.7023	139.13
375	76.9286	323.561	215.739	331.991	18.7178	-387.188	-67.6449	71.4193	245.785	-276.723	110.777	553.785	179.685	-173.008	45.4607	-2.24684	208.792	-394.504	216.932	153.793	-106.189	61.0262	-143.901	-13.8309	177.916	284.139	-211.872	-429.733	198.254	-227.099	87.6487	-99.1437	36.2895	-127.889	117.984	-253.921	-100.481	112.233	-269.918	47.9358	-87.3458	-7.39841	-42.3386	228.745	-171.04	48.6938	-250.777	-294.096	53.9089
380	21.6215	690.061	304.713	188.014	81.8646	-521.022	-144.507	297.578	137.691	-51.0962	-163.345	691.632	202.768	-115.974	-28.0561	129.704	137.863	-353.695	80.8984	139.997	12.9142	-86.0402	-48.9904	-36.3825	-38.4746	227.281	-113.367	-352.251	-70.4665	-354.002	17.9073	-153.707	-168.384	-345.34	92.0606	206.29	114.626	77.9459	-179.9	-5.66641	-161.746	-219.276	-82.5414	70.2401	141.934	150.626	-184.444	-139.176	-128.917
385	110.7	459.086	69.8588	123.233	-46.2311	-572.452	80.4769	-51.0321	177.211	15.0784	59.2697	887.484	-22.2248	-31.2241	-38.2754	297.359	180.635	-255.608	-144.862	-48.3253	-126.477	-40.3554	-156.439	46.9633	335.655	146.021	96.9364	57.1208	-143.158	-198.545	4.29774	127.511	172.099	-187.434	283.072	-183.388	215.176	5.80435	-301.946	204.181	-426.24	-240.015	58.9781	329.193	147	245.969	65.8032	267.617	-73.1429
390	175.284	12.8219	-178.415	-201.822	-352.804	-757.262	-193.647	-147.025	-88.8221	-346.428	-290.273	687.825	-261.43	-276.049	-117.728	-127.48	-257.975	-281.474	-321.679	-395.394	-461.302	-340.343	-289.636	-243.548	36.7327	13.0873	-301.631	-490.13	-119.875	-732.044	25.9154	-308.776	-189.026	-372.468	-157.351	-120.02	-66.3879	-17.6242	-549.203	-190.573	-537.19	-109.028	-277.83	-107.444	-258.64	-208.681	-521.975	-99.2051	-338.838
395	-391.366	-319.205	-88.3084	-182.924	-327.39	-1052.44	-115.489	-173.44	-377.501	-581.327	-174.025	592.985	-199.616	-436.947	-406.864	-176.397	-437.422	-387.978	-244.099	-51.0594	-513.215	-384.725	-279.114	-112.536	14.695	55.0206	-467.137	-690.078	-177.9	-973.832	-304.403	-442.364	-244.883	-552.599	-278.287	-179.315	2.31667	-109.019	-487.199	-230.827	-428.996	-258.089	-316.672	-2.78182	-233.914	-165.15	-362.958	-231.467	-487.547
400	-297.479	-186.776	-365.347	-346	-433.044	-683.731	-385.377	-312.933	-105.297	-560.053	-683.482	263.074	-79.6446	-629.9	-347.556	-326.635	-231.739	-359.452	-197.655	-413.205	-247.431	-38.4197	-322.967	-319.438	-83.5273	-240.57	-310.576	-684.101	-221.849	-550.327	-187.695	-180.341	-120.189	-301.806	-162.217	-308.651	-237.721	-105.318	-665.576	-144.29	-392.814	-148.262	-204.351	166.404	-117.895	-17.0524	-408.626	-285.841	-401.356
[truncated: 4 more columns]

## Sheet: DtolC_growing_2
Time (s)	1 bg subtracted unnormed	2 bg subtracted unnormed	3 bg subtracted unnormed	4 bg subtracted unnormed	5 bg subtracted unnormed	6 bg subtracted unnormed	7 bg subtracted unnormed	8 bg subtracted unnormed	9 bg subtracted unnormed	10 bg subtracted unnormed	11 bg subtracted unnormed	12 bg subtracted unnormed	13 bg subtracted unnormed	14 bg subtracted unnormed	15 bg subtracted unnormed	16 bg subtracted unnormed	17 bg subtracted unnormed	18 bg subtracted unnormed	19 bg subtracted unnormed	20 bg subtracted unnormed	21 bg subtracted unnormed	22 bg subtracted unnormed	23 bg subtracted unnormed	25 bg subtracted unnormed	26 bg subtracted unnormed	27 bg subtracted unnormed	28 bg subtracted unnormed	29 bg subtracted unnormed	30 bg subtracted unnormed	31 bg subtracted unnormed	32 bg subtracted unnormed	33 bg subtracted unnormed	34 bg subtracted unnormed	35 bg subtracted unnormed	36 bg subtracted unnormed	37 bg subtracted unnormed	38 bg subtracted unnormed	39 bg subtracted unnormed	41 bg subtracted unnormed	42 bg subtracted unnormed	43 bg subtracted unnormed	44 bg subtracted unnormed	45 bg subtracted unnormed	46 bg subtracted unnormed	47 bg subtracted unnormed	48 bg subtracted unnormed	50 bg subtracted unnormed	51 bg subtracted unnormed	52 bg subtracted unnormed
0	0	0	0	0	0	0	0	0	0	0	0	0	0	0	0	0	0	0	0	0	0	0	0	0	0	0	0	0	0	0	0	0	0	0	0	0	0	0	0	0	0	0	0	0	0	0	0	0	0
5	89.3971	226.174	311.423	-50.5568	79.6076	-22.4058	-204.945	109.869	141.272	-145.776	392.73	-133.556	-202.958	105.154	187.105	215.631	283.502	-99.0228	34.505	150.996	5.65069	-99.2368	195.023	160.943	137.611	-58.5189	87.0646	-180.501	2.52395	-133.304	37.8162	218.567	-148.804	116.324	25.5773	-230.174	180.925	209.293	-40.5609	-123.819	-195.418	211.76	-123.347	-239	-315.917	89.2709	-516.529	-12.133	133.44
10	217.922	210.212	650.882	-133.59	74.2034	99.6009	-92.2776	218.073	-15.9637	-48.4315	585.858	-62.7609	155.701	176.753	409.544	226.227	-31.6585	116.743	6.79779	267.827	174.308	24.9655	-49.4255	125.384	-88.5541	-97.3059	-83.2904	-295.518	-209.103	-83.2278	187.482	37.6094	152.463	-412.515	157.251	99.4896	52.0647	260.412	-312.662	-292.333	-203.918	146.404	-143.391	77.6686	-254.824	260.514	-120.29	-124.959	271.892
15	118.455	143.779	595.553	86.8809	45.7461	-182.321	273.86	329.372	-146.324	-109.288	381.62	94.1273	-226.237	176.301	154.629	220.7	-167.747	57.2557	-213.433	330.956	10.9418	58.4926	181.259	111.153	-88.3762	-244.343	-63.9279	-191.846	-209.279	-198.136	162.558	66.5533	-245.173	-144.682	-76.555	-263.828	-270.177	138.259	-355.418	-169.847	-258.021	-201.037	-170.326	-364.426	-384.93	355.779	-34.9421	-273.79	-2.98264
20	269.646	-150.726	567.925	115.388	44.7116	-16.3519	49.4636	100.758	187.013	62.4766	265.992	67.4115	-23.7099	339.342	348.599	183.093	-58.0234	61.1693	66.4862	243.986	56.6376	151.324	145.767	175.498	-9.33505	-146.086	-36.9279	92.1387	-171.403	-287.404	201.482	-179.015	12.8967	-358.292	73.5183	-50.6231	-16.8	340.745	-159.129	55.8256	-106.838	32.0536	-335.816	-126.286	-221.832	140.515	89.0345	85.2108	127.706
25	202.509	-317.634	614.451	-144.834	-52.4484	103.089	-146.098	72.9659	271.423	-33.3437	324.423	-167.369	-189.808	146.44	20.616	317.08	236.833	46.9993	-282.534	139.648	50.7028	203.293	-22.0035	-26.1715	-104.729	-106.499	-235.166	-146.511	-252.609	-375.985	233.337	215.988	-252.615	83.1599	-18.3535	-260.394	69.1118	195.243	-29.212	-70.5135	-67.5196	48.1478	-65.5119	-276.813	-81.5845	221.323	-23.3199	-129.324	96.4345
30	327.678	78.2558	666.059	2.96473	91.729	53.447	-311.763	130.051	291.254	44.4143	269.268	66.8109	-15.9929	14.0986	255.828	70.1226	-214.793	143.973	-61.8814	49.703	-5.49153	103.712	-16.0191	79.2173	-42.6699	115.037	-256.859	-301.617	-9.47119	71.5722	-181.347	-129.907	401.9	16.4275	-20.4804	3.67272	-175.62	234.341	-72.7377	-191.693	73.6016	90.7521	-406.647	-79.3167	-249.013	218.975	161.606	10.0156	16.1792
35	244.685	132.722	700.143	-99.8109	136.746	-9.12879	-224.402	126.219	116.456	43.9889	222.513	60.1237	-215.871	110.878	-38.4851	76.0686	195.751	-7.73862	16.2554	200.892	244.069	176.636	-165.447	164.31	188.83	50.3644	-164.691	-129.664	-81.1208	-289.858	465.484	116.055	110.495	41.9272	-193.933	58.4766	-13.7113	330.065	-233.455	105.603	211.828	195.04	-434.532	-150.971	-365.831	2.95754	124.827	51.5553	182.031
40	15.3088	-40.7427	426.921	-38.4496	-184.158	-195.734	-28.0995	126.998	77.2876	-1.264	132.917	52.8967	-72.604	381.578	225.102	314.652	173.879	176.504	-211.529	375.999	133.349	-273.931	-132.75	165.736	-423.14	-200.685	10.4334	54.233	-349.326	41.0286	429.473	-108.281	-101.089	-274.575	-158.314	-18.4215	90.1022	192.44	-193.633	68.0323	-50.8276	203.343	-109.828	-87.2443	-385.451	130.949	93.5662	-74.7073	47.4849
45	49.8073	123.477	437.058	-21.7859	-26.1451	-13.3607	-13.4422	160.643	246.119	-150.525	241.451	-280.632	-193.066	48.8229	-53.3647	44.2404	43.0678	-234.739	37.5227	325.449	182.496	169.647	-515.977	304.902	-22.3002	103.282	-223.267	-23.1805	-121.172	-132.52	304.069	116.721	70.9081	-123.837	74.5641	-210.747	105.402	76.8248	-289.314	-41.8204	-121.122	-154.304	-347.151	-109.448	-154.091	261.774	20.9263	-200.831	166.99
50	186.575	-48.852	723.232	113.365	-31.7174	-64.0221	56.1673	80.6613	145.892	-15.174	343.453	-122.344	73.0374	235.671	477.49	410.187	234.194	128.045	34.4689	251.113	265.653	192.521	-184.781	491.3	-80.4611	-233.643	154.674	50.9654	101.996	-251.978	356.272	-36.837	-173.548	8.03842	-188.195	84.7244	62.253	290.275	-318.723	-98.8763	-177.532	-127.406	-286.25	-191.476	-377.812	-50.6729	36.4276	-100.771	22.0512
55	386.449	331.159	417.946	12.5197	142.425	75.7237	185.612	183.48	-129.971	55.6366	412.741	119.584	-72.8159	122.589	68.0076	-16.2545	45.4077	-21.0185	-8.51515	603.326	257.212	266.3	-277.698	472.309	156.963	-111.374	-127.807	-452.971	-157.712	55.352	282.091	164.07	90.1329	-38.3166	-111.128	-33.5423	43.7423	72.8699	-129.036	-26.6484	-49.3987	261.477	-343.877	-85.9398	-348.143	211.682	41.0668	-192.498	214.112
60	292.261	192.875	730.53	30.545	306.261	143.509	166.835	237.095	200.592	276.287	385.21	32.6718	107.466	417.154	242.97	125.612	275.779	368.938	144.069	488.788	255.242	-58.3254	172.723	126.271	79.6258	-14.4744	-129.915	-117.141	-185.911	-273.295	253.632	116.283	209.156	-8.05927	-33.7805	-127.053	8.21515	371.273	-274.247	-1.68016	13.1282	28.5173	-215.772	-195.334	-293.531	-23.9871	-99.0371	85.8492	-21.2508
65	505.854	58.9853	697.745	176.825	240.172	139.398	144.473	129.857	111.151	72.2411	474.25	-199.284	-131.007	15.1191	346.755	153.27	146.845	161.471	76.2689	213.998	245.582	79.5957	-161.85	173.258	-73.3155	-59.7539	-206.303	-42.6947	-174.603	-194.384	463.411	152.415	11.4399	98.739	-46.3988	13.1626	183.991	369.947	-160.531	110.535	-158.52	117.027	-231.319	-171.117	-122.892	191.08	27.7984	66.4484	72.076
70	441.08	88.9024	768.962	147.063	171.951	120.851	-136.676	185.117	244.41	-107.453	357.022	-70.8019	-101.118	367.802	165.199	183.673	240.821	200.36	246.069	415.5	302.684	201.802	-111.242	433.006	243.917	97.0644	-291.446	-107.725	-32.0804	-254.122	490.669	209.698	164.711	54.6099	109.707	60.1603	-11.1448	243.558	-171.335	154.932	7.64006	169.017	-123.654	65.5301	-122.284	164.94	258.122	76.6794	-10.5575
75	70.9271	-24.2003	539.726	164.147	239.95	102.349	18.0078	159.792	6.11719	-183.356	61.0968	98.566	68.2901	60.8644	338.979	68.717	-192.698	141.348	-19.7644	185.81	-207.223	142.559	-180.333	152.731	115.038	124.51	-69.1608	-214.026	-131.035	-311.422	292.632	183.493	211.863	-147.054	-418.104	22.4883	-88.4037	79.9065	-254.891	-124.098	-167.171	54.917	-176.165	-53.0595	-127.65	204.72	257.595	135.814	-95.4506
85	207.267	-107.884	448.215	-63.5807	49.7933	-232.014	-19.2695	105.353	254.203	-122.971	609.207	-267.306	-148.122	212.987	-40.8135	337.088	-175.36	143.624	-227	345.419	249.653	33.4071	115.684	43.306	223.623	88.1303	-63.4572	-227.703	-23.9603	-271.871	499.433	151.748	-61.8116	27.4667	-41.7653	-11.4215	181.635	120.384	-139.248	-27.9076	-88.6036	21.2817	-233.458	-82.7142	-65.67	126.56	-0.24437	185.649	179.493
90	225.617	-51.6088	486.303	243.184	272.891	4.9866	71.5888	147.505	48.5097	128.752	553.436	134.934	-255.429	205.258	254.405	245.574	170.31	88.4638	110.46	22.8571	398.655	238.786	-235.52	526.186	179.347	176.87	-422.913	-102.328	-316.54	-146.991	58.1319	-80.0289	14.7561	182.404	55.8975	-15.0474	227.755	247.302	-338.836	21.4296	-249.378	-44.9721	-118.967	-10.5349	-154.521	172.369	202.625	3.55414	139.717
95	268.679	112.213	691.779	397.575	48.8516	57.7764	177.284	127.203	272.908	160.963	186.524	-177.434	-160.232	197.557	72.0563	480.771	137.01	-23.4179	292.564	-52.4	412.796	161.022	-187.219	386.682	117.58	-20.3435	-108.467	15.7469	125.881	-78.465	492.29	276.211	157.094	380.931	5.20993	236.378	-105.405	355.821	-199.684	-29.9167	-202.245	-94.765	-421.056	-251.394	-112.242	332.63	-2.57148	178.459	118.107
100	415.047	-146.073	508.908	-71.284	315.961	35.6454	132.122	396.26	8.31422	-87.568	56.7051	-47.0213	-629.469	332.477	176.099	-60.0556	99.6374	22.2305	147.789	110.02	63.5815	-345.261	61.2807	448.061	-43.128	-47.4193	-409.609	-185.035	120.537	-139.144	114.273	-88.3315	-75.9544	37.839	-131.11	-349.643	-95.3781	-98.163	-338.799	145.17	-254.939	-21.314	-404.79	-373.044	-226.642	-188.505	-31.4224	148.408	-112.072
110	354.353	-95.7437	616.302	185.982	279.271	16.0334	153.912	72.206	172.675	-140.914	701.245	-97.5911	-731.899	10.1301	187.549	275.755	-9.88596	357.965	-231.805	-28.1879	174.337	180.311	-441.929	387.826	-201.104	-22.9854	-430.214	-242.602	-385.419	-329.304	331.431	-129.001	-101.565	-214.598	-95.2585	-28.9748	-191.869	103.721	-460.879	-353.057	-300.941	-177.688	-125.903	-554.658	-306.549	-100.79	-3.87752	-213.65	-47.4851
115	348.837	-0.27609	532.998	180.104	96.1491	-64.163	25.0409	62.9858	176.492	-198.966	549.908	-248.528	-634.206	165.103	-116.158	300.616	118.473	183.3	61.7148	-164.376	418.134	193.394	-331.161	-4.17656	-183.892	-69.9705	-772.001	-167.103	-177.728	-354.294	72.3369	82.3175	-298.768	27.3989	-110.786	-38.5003	289.744	70.9203	-58.0592	-271.435	77.7018	-143.911	-339.15	-207.34	-317.126	56.5752	-105.293	-165.564	-122.174
120	206.468	-11.8459	612.332	-22.1625	141.117	-304.474	-5.66891	-42.7273	67.125	-185.87	122.5	-111.129	-652.02	-77.9589	-158.353	18.8823	190.265	122.735	-165.76	254.578	225.288	100.891	-164.936	593.14	-95.1378	71.2944	-466.98	-168.798	-85.3187	-162.072	385.482	227.488	200.629	-172.883	-157.362	-47.4351	-31.0266	437.789	-111.102	-77.6657	-108.549	147.189	-232.509	24.3242	23.9192	211.497	154.308	179.163	262.122
125	395.843	-67.8909	442.058	111.162	99.8234	-101.251	-93.3991	-55.081	128.01	-129.614	76.8026	-21.3256	-480.352	10.1018	115.625	89.7787	534.633	58.0286	-30.6845	-69.5136	175.503	52.3382	-234.853	-1.17817	-62.3619	61.5484	-350.042	-154.443	-258.698	-425.361	35.3287	37.2969	29.4531	127.187	-51.7818	-401.182	243.099	-38.7834	-164.278	-194.022	-125.987	-70.1151	-302.952	-264.748	-333.53	230.914	101.022	-95.0267	12.6146
130	254.963	122.194	800.874	-382.025	-0.86039	2.30871	201.26	36.6202	125.905	-320.287	170.973	-138.525	-476.606	29.501	-47.8084	366.92	-29.5434	179.257	-242.21	350.85	165.658	400.029	-61.3786	334.644	-127.049	251.636	-298.844	-57.9434	-189.603	-285.096	568.686	301.955	-14.4905	521.628	18.6139	31.4057	250.105	47.7333	-481.598	14.6678	-221.697	69.9413	-142.694	-354.462	-218.378	505.37	88.332	57.1874	192.597
135	277.535	-45.7131	385.479	60.9691	134.79	-179.129	-179.509	146.074	62.9725	-202.543	406.283	132.189	-438.824	99.9207	-123.22	93.3707	54.1812	70.4226	-26.5602	240.592	153.934	178.28	-654.52	449.136	48.8328	27.0116	-175.937	-435.865	-145.795	-149.955	219.677	-53.7632	96.2156	195.9	-14.3267	-21.3777	107.774	232.923	-62.1901	-11.3593	-223.258	191.171	-39.3876	-264.865	-47.2667	160.583	-346.069	110.282	170.444
140	294.254	50.4613	160.601	50.1248	23.9311	-89.4328	-14.1754	-51.2885	-26.1745	69.1742	406.537	-79.3595	-99.3135	-62.3778	-114.977	-57.5595	108.936	139.211	7.82727	-282.882	47.9306	126	-362.575	313.187	-113.586	-122.629	-343.052	-260.004	13.1134	-109.466	164.407	104.697	47.5773	123.508	-180.364	93.8837	119.075	155.38	-103.303	-148.272	-253.754	-67.2395	-137.688	-374.458	-164.828	-23.0173	105.189	78.2205	12.1903
145	317.113	9.63471	325.152	76.5236	203.104	-161.953	5.09787	83.1758	47.3132	-157.764	440.352	70.2327	-480.545	154.83	347.205	399.991	-16.9434	69.6639	-16.5885	420.657	330.385	166.333	48.2229	131.46	-60.9607	-46.2044	-257.519	159.702	-17.8681	-255.285	-216.475	179.467	49.2109	-229.39	-222.69	239.759	33.6423	94.889	-48.4609	-84.3258	-88.8876	211.856	-314.83	-195.956	-189.053	125.718	-28.3179	157.311	96.2314
150	358.489	219.489	447.46	231.716	-137.964	113.726	233.953	294.219	239.572	352.174	358.65	157.529	-246.235	315.677	117.798	358.292	158.497	204.112	94.3656	294.998	335.273	229.954	-179.59	593.756	-43.9762	-201.173	-195.174	-158.151	55.8326	-78.5973	391.407	430.189	124.912	129.085	-274.919	-59.3623	24.65	386.418	-462.871	137.27	-282.985	101.687	-267.137	-70.8792	-297.142	278.458	-60.1603	11.6631	249.951
155	459.887	198.285	610.688	171.056	-37.3426	-17.8	143.103	48.6354	80.0004	44.3799	495.652	-50.6698	-581.596	244.575	-16.6742	277.931	143.852	183.892	114.841	53.3002	230.608	226.669	-127.862	417.925	113.517	87.0748	-267.672	-27.2018	74.8479	-99.9441	368.52	24.2479	289.243	-134.87	3.09756	142.303	-9.70909	182.787	-407.066	-286.828	162.124	98.5571	-266.018	-191.414	-82.9156	75.9403	-5.46868	-45.3482	193.848
160	622.267	150.926	500.808	-118.474	-24.1695	218.348	357.15	237.013	215.676	397.654	563.886	328.899	-467.994	239.438	92.0901	31.8889	330.442	409.854	109.116	-171.845	286.457	338	-115.287	236.425	182.862	-167.94	-457.338	-122.438	-102.584	-176.454	409.147	58.9062	165.669	-206.853	-191.229	42.6378	20.8515	193.842	-475.778	-15.7901	-56.3818	-91.2746	-339.181	-68.9565	-265.398	98.8388	-31.5942	-167.42	103.891
165	198.283	223.659	633.424	14.9313	35.3552	-29.2344	38.2207	-195.816	313.567	288.837	410.066	-208.659	-693.591	221.958	185.278	246.361	254.734	226.252	188.391	-125.817	473.732	24.8558	-113.981	178.93	-76.2168	45.2015	-337.107	154.678	-236.769	67.8902	97.8912	-1.67463	227.331	-10.5078	-226.992	-45.8102	232.168	-82.3358	-537.929	-201.929	-231.087	171.852	-219.055	-138.82	-210.714	219.965	90.7046	40.8993	119.485
170	428.316	238.437	496.848	275.975	293.124	18.822	270.519	215.891	292.038	179.538	491.604	-132.314	-504.151	405.418	-1.4616	344.617	144.042	123.128	86.7371	131.28	313.721	309.687	-213.697	179.622	-47.9341	132.064	-41.7926	65.9934	-166.458	-32.9405	1.86329	333.67	-15.6106	241.61	74.2951	2.89103	265.281	-140.988	-408.043	-83.7016	-177.31	102.563	-427.652	-100.332	-55.9355	152.36	-46.5799	297.255	-97.7432
175	-74.7241	223.086	883.652	156.514	125.905	-147.437	77.0205	55.1117	130.564	99.8299	494.896	55.5475	-526.687	161.536	314.786	311.523	0.57484	225.284	-132.23	-41.8202	498.527	89.1375	-129.401	395.918	273.914	83.8781	-723.75	34.7866	-111.15	-113.397	567.375	-35.3836	124.477	238.88	-30.2557	-58.5827	169.212	-184.603	-332.919	-197.574	-130.631	108.61	-451.983	-382.847	-170.101	77.3171	248.439	-131.685	-31.6047
180	455.878	81.8314	849.094	230.893	240.467	-86.8832	259.856	-81.0144	-25.9191	-17.272	531.895	85.0173	-580.736	301.543	486.294	327.5	226.636	236.331	-131.601	227.78	569.954	235.805	105.541	602.456	142.131	45.445	-104.865	36.5258	-157.75	-113.778	217.126	26.3724	227.634	231.616	-32.3666	18.1459	86.7682	150.758	-383.009	37.2333	-113.672	352.565	-412.705	-363.988	-240.374	190.208	-101.568	87.8897	-14.3497
185	711.458	148.126	643.85	8.11877	174.871	44.5379	218.108	-26.1065	333.323	-127.899	478.46	-120.644	-475.129	74.7526	178.798	247.103	61.6663	103.443	158.102	175.158	396.463	363.14	-16.8042	122.518	309.263	-284.39	-198.651	275.666	0.18687	-124.461	398.949	-12.4405	331.092	-7.80282	-162.35	-122.469	153.143	132.93	-300.576	-77.1973	-337.796	259.6	-216.072	-473.343	-143.799	330.578	185.631	-258.788	33.1248
190	504.316	225.071	632.051	63.2697	74.8169	-17.9224	266.119	177.836	162.867	226.325	279.649	139.399	-616.444	300.615	322.961	375.398	105.874	268.374	85.4047	286.05	645.515	412.076	-129.53	392.175	26.4986	-17.4726	-96.1623	5.90987	93.344	-207.856	284.305	122.026	303.279	-92.3544	-4.18825	78.9291	157.004	421.629	-292.361	133.519	-286.748	199.032	-338.573	-6.90249	10.8363	351.626	22.1849	-8.36492	126.421
195	342.008	328.501	532.948	-100.675	274.896	-150.379	169.208	16.4633	-143.031	183.624	345.5	207.92	-294.805	441.434	326.554	371.478	320.41	101.276	93.9978	98.2907	323.802	217.041	-45.4704	227.947	185.139	-104.268	-200.454	-263.442	-8.57156	-131.805	570.957	34.5046	128.06	-10.808	-154.292	-32.9687	-132.717	-211.531	-276.973	-122.486	0.75352	306.602	-293.083	-198.48	-185.74	229.647	-34.1287	-61.1993	40.0838
200	341.88	379.651	598.859	99.4958	261.534	13.3873	314.603	116.267	295.297	269.367	691.973	151.409	-242.798	369.948	541.809	501.402	216.43	292.179	-39.4905	42.2101	456.668	408.306	-8.17452	790.061	104.398	166.291	-275.011	207.116	157.28	-100.098	271.413	279.92	334.228	303.139	-123.334	305.482	201.767	-104.641	-313.468	232.541	-126.243	157.804	-274.276	-316.736	-41.7176	156.834	237.447	-37.3464	141.406
205	359.961	289.449	182.29	411.318	14.3349	59.6581	306.726	101.929	147.471	157.336	20.1923	100.76	-542.567	120.472	348.744	2.54545	225.315	215.234	166.429	87.9268	351.987	283.086	-48.2507	493.004	-173.654	-91.1447	-185.122	-40.9899	-46.8581	-72.566	189.366	142.088	229.751	274.069	88.3391	178.031	295.95	173.552	-244.322	189.827	-183.717	165.586	-360.976	-155.324	78.0999	179.802	36.4033	219.793	-13.4854
210	423.953	300.642	443.715	159.038	35.696	-6.36851	164.136	350.893	141.777	-34.8826	393.615	-142.166	-288.288	371.547	232.925	240.136	255.752	245.957	177.44	64.8451	617.743	353.683	226.716	383.383	89.4195	55.0399	-43.4725	1.10524	152.937	-24.6911	714.055	176.398	211.442	-42.8366	-131.53	274.619	120.08	355.943	-489.383	108.749	77.971	223.686	-317.253	-97.0425	-372.672	103.031	136.428	-68.7664	95.3665
215	266.601	388.764	454.152	536.997	291.228	15.5886	138.186	452.591	128.661	191.437	679	-145.489	-575.605	435.018	360.851	642.636	107.977	446.088	254.894	8.26698	363.297	276.06	364.348	515.267	206.638	303.039	-425.167	216.84	26.693	-367.324	444.12	-131.129	123.1	90.1745	-21.3531	347.632	331.464	-47.5528	-414.476	3.53588	-274.156	243.664	-276.919	65.7495	-174.039	185.956	76.516	54.4939	60.5072
220	344.761	358.309	379.729	30.6466	132.608	143.968	162.602	372.049	172.853	-50.3413	405.578	-113.812	-281.386	77.5618	389.559	-66.213	198.008	333.137	223.08	-31.3678	379.977	151.782	11.7708	295.652	253.248	-129.285	-278.221	59.5306	-12.4854	-99.5862	305.356	58.063	26.1655	-43.1998	-252.061	-140.389	179.753	57.7893	-314.405	-343.198	-576.664	228.462	-336.127	-26.871	-188.463	62.0809	-325.447	-82.2073	-139.038
225	503.397	-77.8014	465.802	226.901	97.5218	-9.86013	46.9431	404.105	241.535	-86.4071	332.059	49.7523	-358.632	-8.81688	316.772	251.153	412.127	157.188	-202.576	239.013	241.252	-1.5	19.2633	263.932	-68.0359	-55.6072	-366.225	-126.176	-92.9891	-272.02	546.308	-71.7557	234.699	-96.4651	-325.198	-219.566	-189.417	29.3021	-602.439	-63.9675	-410.099	3.47857	-668.059	-489.475	-188.256	11.3839	-103.141	-207.025	-353.424
230	332.085	-78.902	576.873	108.749	257.799	65.3579	185.448	153.691	347.92	5.54661	395.208	-34.1944	-633.174	166.555	26.4686	444.459	300.724	-7.50159	-76.4745	15.1718	521.378	316.228	-73.6968	387.701	-179.729	-238.745	-133.221	284.925	-205.518	-210.641	845.41	-4.92708	82.1121	-66.0073	-117.408	67.5778	-247.775	103.95	-435.128	-358.975	-355.07	-180.772	-393.818	-107.846	-146.779	194.553	-63.9365	-174.859	-79.0339
235	284.595	263.898	565.18	-50.3535	136.323	105.393	177.199	-110.411	315.399	11.1812	70.8846	-353.956	-643.494	31.4247	16.0966	182.482	125.067	80.3857	2.72727	-86.1909	311.118	251.023	-133.547	265.284	2.2619	-92.6839	33.4755	-18.5321	-32.6187	-187.54	465.208	-57.6227	-13.2859	-39.9735	-312.694	-11.4959	-51.15	15.9434	-440.694	65.303	-285.287	30.4093	-606.095	-227.379	-238.713	-177.437	-87.8487	-293.968	-47.5766
250	394.041	306.45	245.783	30.1394	152.246	17.6712	-14.2417	-179.889	280.369	-194.484	247.128	-224.504	-381.428	259.286	178.881	417.811	292.38	-18.1096	-195.74	88.1498	457.214	263.106	119.33	143.659	-43.4485	39.8037	15.018	83.8105	-18.2449	-353.491	743.754	257.884	250.047	-160.179	-162.718	74.1105	-327.103	222.239	-604.788	114.626	-302.461	-296.926	-324.105	-114.059	-459.762	-192.253	-391.98	-118.842	-240.091
255	378.216	257.696	612.267	71.5272	-60.2043	-50.8561	330.965	54.107	56.821	-223.097	191.688	-562.804	-224.88	9.40078	-18.6217	98.3246	291.672	49.0251	-355.429	206.999	836.569	186.051	4.79522	254.743	176.753	133.427	-292.425	197.474	-61.066	-576.032	700.188	-75.4467	-108.945	-48.1507	-281.203	-66.4681	-351.06	107.769	-511.453	-238.752	-639.251	-83.4442	-399.124	-329.223	-452.544	-220.038	-180.176	-375.047	-87.566
260	399.577	443.381	416.518	-251.853	-102.16	-159.204	-35.3616	0.41674	55.9031	-249.252	297.2	-284.899	-408.893	-122.713	-124.031	185.536	154.13	-257.521	-133.43	-135.059	683.887	179.143	120.567	366.175	-239.668	-135.506	-527.834	-112.311	-101.985	-566.871	434.971	-262.885	101.668	-10.812	-201.308	-378.855	-472.371	212.769	-423.961	-78.5244	-278.911	62.6865	-406.323	-370.711	-284.453	-130.86	38.4807	-407.006	-244.143
265	392.116	194.848	595.968	-516.956	-208.882	-16.8307	-303.027	-307.293	-153.714	-405.266	202	-603.267	-435.56	-387.116	-277.751	-83.275	117.967	-164.938	-301.273	342.508	339.896	194	-95.2639	205.28	-236.163	-100.48	-85.8341	-96.5176	-199.196	-425.398	146.648	61.8359	-117.548	-173.623	-497.249	-290.046	-383.873	65.5072	-468.755	-219.117	-96.9686	-215.668	-315.419	-331.812	-251.617	62.9085	-176.01	-261.256	-65.8662
270	-56.6967	-314.66	63.3178	-290.978	-238.444	-254.829	-160.99	-401.076	-385.703	-562.553	2.25833	-533.502	-816.079	-427.974	-498.1	42.5472	-249.994	-221.08	-711.947	67.2824	146.294	50.8243	-68.1637	299.585	-171.033	-292.773	-742.203	-80.3797	-50.4583	-528.472	133.363	-243.396	114.937	-435.525	-610.397	-288.665	-526.34	23.8753	-558.718	-64.6828	-302.44	-395.713	-444.647	-624.524	-811	-190.548	-101.32	-225.575	-257.57
275	196.992	-314.022	276.393	-216.825	-233.452	-268.455	-287.559	-251.24	-395.758	-439.518	-35.1017	-864.251	-503.619	-765.66	-522.29	-233.347	-112.939	-57.8571	-721.181	-14.1436	321.557	-228.047	-223.828	-50.488	-72.5105	-259.799	-920.627	-348.339	-305.51	-679.346	-259.743	-230.211	-267.335	-300.296	-878.382	-603.262	-662.828	-159.1	-612.787	-280.135	-268.64	-88.52	-411.504	-423.802	-489.215	-187.369	-44.2136	-507.81	-515.633
280	42.543	-121.441	106.919	-236.725	-291.633	-390.841	-236.212	-307.923	-241.348	-692.637	119.936	-732.087	-797.578	-330.374	-386.079	111.708	-131.033	-184.29	-726.773	199.676	208.341	-76.061	21.4545	273.73	-86.4699	-334.245	-809.338	-275.372	-160.955	-669.97	-164.618	-290.198	-12.2847	-296.515	-756.246	-664.472	-645.955	-73.2444	-887.763	-71.3845	-210.536	42.5179	-564.539	-483.007	-745.166	-51.393	-409.542	-326.997	-596.233
285	6.85942	-246.541	-129.345	-566.82	-504.126	-704.045	-341.38	-416.208	-540.135	-838.051	-230.398	-651.175	-827.744	-500.598	-410.38	-241.657	115.052	-530.568	-399.596	-254.094	26.8567	-371.746	-348.303	-27.2764	-537.857	-367.39	-784.305	-214.436	-194.279	-559.239	-188.932	-281.604	-110.028	-534.96	-871.222	-578.829	-354.883	95.3521	-814.013	-199.711	-292.337	-286.501	-532.235	-705.27	-493.013	-330.622	-375.445	-685.413	-430.397
295	59.7026	-168.382	393.008	-197.55	-267.72	-275.629	-323.678	-170.926	-54.5275	-580.306	115.339	-501.137	-718.691	-478.98	-253.058	3.33	-7.80946	-290.418	-475.076	73.8475	137.255	-241.833	-260.561	340.968	-341.907	-345.547	-1060.43	84.5733	-125.731	-342.356	-45.9584	-377.113	-115.125	-655.319	-799.164	-309.532	-561.527	-173.513	-723.185	-216.53	-229.278	300.437	-706.686	-495.885	-362.46	-147.602	-239.563	-276.373	-183.829
300	-130.29	-289.229	210.45	-325.469	-435.424	-492.529	-230.026	-124.397	-300.321	-156.467	75.7	-606.696	-671.124	-694.392	-353.251	-162.844	-19.534	-265.777	-773.677	143.847	21.3603	-70.1271	-102.613	162.042	-105.526	147.155	-998.634	-271.505	-8.55208	-445.144	253.055	-256.452	-264.378	-605.719	-1060.28	-635.227	-535.43	-246.307	-803.601	-227.492	-208.443	293.467	-389.428	-713.224	-381.182	-4.18007	-290.103	-518.017	-632.151
305	-102.454	-569.807	-79.6162	-314.652	-511.822	-759.004	-505.072	-365.843	-482.262	-647.934	-1.87931	-784.21	-749.3	-688.176	-461.788	-67.5984	-402.214	-315.111	-713.073	5.02377	-113.663	-550.526	-433.174	-315.293	-159.163	-397.423	-715.888	-569.142	-567.213	-431.731	-317.758	-456.99	-728.286	-648.177	-953.263	-570.367	-978.901	-201.361	-812.427	-265.406	-387.615	-124.777	-650.198	-691.087	-566.405	24.1162	-329.235	-842.094	-469.112
310	1.4346	-373.113	202.472	-264.726	-236.954	-507.95	-431.377	-301.284	-207.569	-85.9761	198.205	-509.701	-726.032	-835.838	-306.172	258.473	-19.2753	-92.4143	-527.529	-95.2424	191.704	45.8482	-294.143	-95.2592	-160.579	-158.349	-975.3	-211.771	-415.613	-563.138	37.5527	-383.767	-144.458	-525.937	-1043.58	-460.991	-491.989	-335.847	-808.876	-9.55	-212.754	-82.9838	-522.369	-769.263	-446.513	105.832	-338.019	-458.087	-453.76
315	41.1467	46.1174	423.215	47.9826	242.724	-308.568	210.413	-19.8288	-54.8881	-56.1478	398.745	-348.581	-502.259	-519.134	23.4773	292.812	259.572	129.171	51.1103	172.542	449.738	56.9844	79.9186	320.903	-35.3932	-148.575	-606.775	172.234	-322.697	-433.378	274.806	-172.39	-44.8606	-319.029	-695.027	-552.247	-383.55	160.455	-692.35	7.91508	-145.918	236.209	-652.158	-782.184	-177.896	74.4806	-206.501	-666.709	-561.492
320	142.359	132.195	92.3295	-126.785	193.637	173.734	110.956	169.739	48.3869	70.3766	431.409	-236.617	-588.494	-330.921	105.978	168.481	106.785	162.694	-190.669	27.7594	199.532	94.5873	105.94	329.145	80.4475	-40.2378	-804.899	-126.452	-18.085	-182.208	82.3421	-361.657	54.5511	-561.765	-531.817	-469.609	-461.496	-130.453	-666.919	-108.998	-271.147	-160.48	-767.236	-723.067	-386.935	-291.457	-498.928	-574.097	-505.993
335	-50.3026	-126.94	200.03	-200.268	-39.4484	-240.267	-205.526	83.075	-226.911	-364.341	-62.6727	-381.304	-1038.23	-690.085	-567.564	-107.685	-185.367	-16.4238	-300.738	204.289	63.9459	-181.37	-312.36	-70.784	-303.582	-262.72	-782.745	-229.864	-320.141	-257.582	-142.749	-211.864	-379.275	-525.435	-601.983	-294.85	-365.147	-407.708	-857.138	-126.371	-248	0.29762	-564.26	-635.557	-159.19	74.3648	-612.682	-358.237	-410.199
345	132.46	-240.591	-33.21	82.5632	-27.0847	-65.3004	-87.3123	-100.258	-17.1572	-570.578	297.606	-494.764	-780.691	-468.035	-267.594	-41.8571	35.5386	-368.481	-391.212	-68.7033	23.0694	135.438	-230.297	273.197	-235.413	-163.945	-866.709	-91.9295	86.9412	-342.054	141.594	-410.93	-138.716	-161.403	-456.599	-422.942	-196.237	-250.133	-772.047	-200.405	-102.545	91.873	-566.919	-589.811	-275.656	82.6174	-359.53	-251.084	-53.9859
350	163.354	-18.8974	364.262	216.816	198.177	8.82866	188.797	206.681	26.8355	92.4448	349.237	149.759	-628.573	-255.177	-186.953	190.464	110.687	368.103	-333.408	101.015	465.932	511.627	30.8182	248.566	152.841	-42.5392	-729.383	-106.073	-113.59	-308.162	259.175	-243.362	-159.548	158.666	-375.078	-85.7843	-158.968	-407.126	-774.906	-106.176	-95.9904	61.0617	-563.341	-445.726	-278.995	-16.8579	-323.739	-63.4749	-75.1
355	252.673	-278.981	191.262	-127.151	222.744	-144.018	37.4049	-133.837	72.1717	-357.897	321.48	-333.059	-541.747	-299.827	-32.707	-28.2	261.462	-126.745	-330.401	179.136	175.774	-205.75	-157.932	420.13	-125.132	52.0389	-702.473	-202.712	-348.471	-140.285	385.46	-1.00359	102.817	-174.999	-449.212	-153.814	-344.497	-365.888	-883.287	31.3749	-102.178	73.9991	-559.91	-482.769	-146.824	64.2617	-30.6058	-210.032	30.684
360	-43.6807	-228.561	-20.9913	194.867	72.1736	-37.2859	111.631	173.109	3.99814	-264.554	526.67	13.3615	-867.226	-240.637	-33.7737	32.9259	189.137	27.6941	-118.299	152.01	345.516	92.3404	-110.093	412.189	4.16999	-205.701	-690.462	-294.652	-12.2051	-312.885	281.119	-181.162	269.196	-309.679	-291.046	-339.737	-385.312	-339.318	-678.493	-229.067	-325.361	172.548	-434.189	-460.326	-414.112	143.19	-214.046	-237.242	-188.135
365	31.5935	-318.943	-89.7457	-6.95213	-234.814	-231.513	-11.8867	-165.543	-361.826	-156.988	169.245	-54.55	-939.266	-337.401	-187.569	2.68	-39.7071	-408.349	-515.773	-9.26364	275.05	-118.127	-197.497	423.709	112.31	-375.482	-593.538	-428.907	-212.119	-440.959	339.246	-394.016	84.1863	-413.541	-356.306	-259.479	-425.902	-327.063	-778.803	-146.274	-396.967	-56.8088	-656.104	-520.751	-342.188	133.794	-113.362	-320.624	-311.789
370	45.778	-345.944	266.356	-25.2068	111.244	-186.742	95.4912	26.7216	9.06795	-253.924	594.167	-226.564	-790.631	-483.327	82.6124	189.754	53.7557	47.8396	-245.454	210.978	111.569	48.9	-240.962	206.412	236.619	-228.646	-329.636	-339.777	-134.015	-55.205	151.434	-181.437	445.397	-588.348	-402.973	-219.491	-324.741	-418.723	-847.759	-26.5799	-163.168	68.9321	-508.87	-563.532	-149.53	98.963	16.7571	-139.799	-59.808
375	250.342	-230.777	-112.59	-216.089	93.8319	89.0462	159.156	-30.0826	79.1188	-212.072	445.29	88.9115	-637.893	-51.6261	39.7993	8.43878	22.409	123.243	-44.7727	327.787	435.191	30.4677	-131.319	452.869	-101.776	-193.504	-901.479	-141.713	-129.202	-98.3184	336.835	-178.707	21.1259	-508.795	-121.988	-335.912	-304.38	-134.979	-653.885	-107.631	-70.8358	53.3348	-483.075	-351.679	-276.299	4.54514	-290.39	-87.2625	88.3712
380	124.744	-260.122	458.011	45.9611	295.534	-268.665	-294.019	-55.2873	-147.413	-257.07	181.415	110.198	-790.393	-1.70008	31.4805	16.2328	58.1374	214.802	-204.875	144.51	233.844	-0.7963	-118.351	412.849	-293.086	33.947	-836.821	-110.626	-249.934	-317.219	441.609	-99.2167	78.9917	41.6541	-111.183	-370.909	-194.475	-469.912	-451.853	-250.138	-34.4814	-61.3917	-424.605	-295.592	-10.2431	-46.1961	-257.671	70.2036	-33.4896
385	-201.873	-353.221	107.54	74.8619	-240.85	-167.861	-129.328	137.984	-69.4095	-196.638	438.211	-183.704	-570.893	-180.498	-137.879	12.7308	-76.4729	87.7845	-281.011	319.956	352.421	115.446	-100.423	52.375	-209.583	-259.185	-416.388	-226.69	-63.546	-276.001	430.203	-62.8909	-72.1016	-237.047	-201.476	-347.553	-247.508	-346.905	-689.1	-28.0593	-225.776	-9.96587	-649.937	-342.575	-382.666	51.3301	35.9129	-162.598	-57.7158
390	170.011	-334.341	28.9462	109.82	137.718	-252.405	42.9364	109.682	-170.111	-266.59	231.886	-76.0357	-463.025	-123.24	-93.2587	313.398	145.574	177.941	-192.529	347.572	159.278	36.9068	-163.131	365.574	-69.7168	-52.3637	-857.032	-279.507	-197.238	-156.08	49.0498	-101.52	117.894	-176.482	-223.889	-650.671	-411.824	-327.713	-643.886	-150.979	-247.866	93.5347	-250.501	-398.327	-56.878	-83.2154	-189.208	-78.9044	-239.278
395	-411.892	-298.81	302.04	-48.1191	86.9014	-244.353	-41.9395	51.7072	-309.987	-371.466	288.408	-242.647	-847.204	-140.431	-147.539	60.0726	-154.869	-65.5584	-171.923	222.477	109.153	79.6691	-310.198	448.749	-291.575	-56.6524	-430.692	-313.707	-169.242	-391.804	686.572	-220.187	133.003	-149.728	-414.104	-363.201	-407.448	-261.583	-444.35	-380.647	-199.543	-108.253	-471.569	-314.932	-289.849	-284.697	-70.0258	-137.765	-184.16
400	-146.3	-643.732	-335.373	-372.546	-215.534	-521.179	-336.53	-452.038	-667.37	-412.893	-169.6	-650.889	-943.249	-521.549	-327.631	-371.115	-264.891	-235.385	-551.697	67.6364	-90.4364	-396.026	-670.619	131.413	-342.25	-246.977	-625.165	-677.571	-438.398	-642.99	297.111	-428.361	-368.105	-384.995	-515.086	-592.956	-637.8	-144.652	-796.013	-387.593	-381.016	-415.349	-624.227	-500.391	-465.729	-39.9514	-190.946	-289.612	-285.737
[truncated: 41 more columns]

## Sheet: DtolC_Stat phase_1
Time (s)	1 bg subtracted unnormed	2 bg subtracted unnormed	3 bg subtracted unnormed	4 bg subtracted unnormed	5 bg subtracted unnormed	6 bg subtracted unnormed	7 bg subtracted unnormed	8 bg subtracted unnormed	9 bg subtracted unnormed	11 bg subtracted unnormed	12 bg subtracted unnormed	13 bg subtracted unnormed	14 bg subtracted unnormed	15 bg subtracted unnormed	16 bg subtracted unnormed	17 bg subtracted unnormed	18 bg subtracted unnormed	19 bg subtracted unnormed	20 bg subtracted unnormed	21 bg subtracted unnormed	22 bg subtracted unnormed	23 bg subtracted unnormed	24 bg subtracted unnormed	25 bg subtracted unnormed	26 bg subtracted unnormed	27 bg subtracted unnormed	28 bg subtracted unnormed	29 bg subtracted unnormed	30 bg subtracted unnormed	31 bg subtracted unnormed	32 bg subtracted unnormed	33 bg subtracted unnormed	34 bg subtracted unnormed	35 bg subtracted unnormed	36 bg subtracted unnormed	37 bg subtracted unnormed	38 bg subtracted unnormed	39 bg subtracted unnormed	40 bg subtracted unnormed	41 bg subtracted unnormed	42 bg subtracted unnormed	43 bg subtracted unnormed	44 bg subtracted unnormed	45 bg subtracted unnormed	46 bg subtracted unnormed	47 bg subtracted unnormed	48 bg subtracted unnormed	49 bg subtracted unnormed	50 bg subtracted unnormed
0	0	0	0	0	0	0	0	0	0	0	0	0	0	0	0	0	0	0	0	0	0	0	0	0	0	0	0	0	0	0	0	0	0	0	0	0	0	0	0	0	0	0	0	0	0	0	0	0	0
5	-129.019	507.783	-0.7484	112.052	-157.821	483.562	363.339	-36.4494	-198.549	647.147	369.083	15.7376	527.798	151.563	273.601	80.454	205.592	-6.97548	172.267	27.3681	109.809	198.908	-90.7183	250.579	122.346	258.038	270.843	170.901	347.276	154.248	288.782	4.5	30.1694	120.54	101.355	128.265	89.5279	195.937	106.976	11.8072	-93.6051	259.646	173.706	90.0833	-260.47	188.918	166.923	94.2098	119.322
10	288.047	518.035	75.5986	433.124	-171.169	484.018	390.128	35.1269	-327.175	480.765	202.308	-108.202	-197.504	40.0113	385.841	301.006	116.926	71.5839	100.247	5.59618	204.813	275.414	-216.729	333.243	161.619	558.994	447.248	246.357	390.118	87.8929	133.385	29.2304	191.507	-35.0266	60.2181	234.653	-33.2098	263.599	185.66	-134.812	-242.141	260.69	219.15	212.456	219.837	119.012	216.667	11.9395	144.522
15	140.452	499.587	163.891	289.359	-190.089	384.435	12.791	157.425	109.505	501.744	195.383	10.8745	413.345	113.83	425.941	171.688	-58.9662	439.652	296.444	177.999	165.607	22.6143	44.068	647.434	-39.2105	285.945	552.017	250.657	142.372	169.556	245.409	22.9352	590.966	486.954	96.0157	122.279	89.9042	34.6743	353.482	-64.3187	-21.6285	25.7962	191.955	83.0855	64.7262	233.72	34.4062	-104.982	86.5004
20	73.4409	509.955	83.1556	222.889	-6.48929	498.703	400.729	128.563	-115.12	235.582	395.406	150.007	-22.857	-30.8924	237.777	-303.149	55.8116	114.481	262.486	367.156	175.895	114.592	21.3954	392.329	374.409	266.235	378.18	141.185	262.184	214.987	280.197	-141.301	202.321	107.413	-148.518	172.51	219.09	87.1723	195.058	108.723	33.9702	388.736	176.224	150.515	58.6762	551.867	128.046	-290.671	119.765
25	193.843	539.236	95.9852	381.58	-2.82005	549.206	475.667	336.79	-339.619	249.391	197.83	-51.2258	424.508	24.8052	284.837	148.78	116.698	347.532	192.168	191.956	-13.3549	132.627	54.3762	702	223.297	340.026	370.911	219.819	321.778	130.875	200.189	192.62	242.306	14.111	-260.416	313.151	438.006	148.037	220.386	-72.6222	23.0658	30.9796	348.345	-77.8785	-99.3571	146.679	77.0833	61.2728	89.8053
30	195.609	595.638	320.554	208.5	114.613	360.648	378.573	311.369	-200.984	346.106	275.996	210.869	0.07528	43.6194	169.439	243.027	247.864	127.231	29.4555	85.841	362.11	194.681	-278.444	473.963	553.962	179.143	555.998	561.283	363.549	169	303.803	159.093	348.283	-62.8279	-107.478	352.851	-138.563	105.288	170.756	32.8451	121.823	285.44	659.319	101.059	240.835	294.318	450.359	120.744	209.097
35	41.3372	426.155	124.907	59.6823	-100.58	624.598	637.27	130.794	13.6237	395.756	329.242	107.598	297.992	88.954	219.003	290.469	261.974	103.773	295.621	209.415	191.915	106.401	128.704	267.058	534.614	327.806	560.245	245.085	288.041	119.479	266.297	36.6822	404.452	163.206	-38.418	4.14286	302.384	238.669	99.1231	-77.79	-249.18	355.616	458.323	-258.759	-262.374	267.496	-148.319	37.9881	45.0624
40	283.255	330.202	77.1916	343.246	-149.481	412.961	367.778	492.707	-12.049	443.734	479.471	33.8847	434.262	107.248	212.473	230.244	232.143	222.903	-33.0402	178.877	208.704	-103.71	-12.8512	328.958	302.344	222.559	331.063	19.1299	366.095	151.035	115.212	-187.953	186.336	314.639	-176.293	262.005	-231.257	255.865	208.145	-26.1536	-222.869	237.516	311.998	-104.454	-268.67	147.813	-51.1944	-81.4111	22.4884
45	238.366	568.69	180.083	248.812	-66.057	759.974	487.948	413.45	161.906	398.901	221.179	13.7655	238.394	129.375	291.561	259.985	204.527	309.718	238.898	171.503	316.257	385.075	4.78448	510.344	344.375	152.131	280.48	171.313	241.574	97.5667	108.457	152.547	415.713	209.995	-204.712	69.3863	-11.2122	91.4527	210.429	59.5463	-93.7207	225.787	365.467	-8.05932	-221.661	510.856	-29.1582	-290.965	100.131
55	197.168	634.535	61.5939	265.334	-93.6106	640.902	297.381	8.48379	-359.524	370.913	171.323	-137.551	120.544	2.97569	303.387	124.428	63.7608	81.9209	-287.609	223.524	8.67293	95.6393	-34.1978	451.76	338.188	185.256	424.345	268.613	155.68	-122.611	166.091	200.937	493.456	-54.5042	-248.843	346.236	105.784	225.513	-16.0288	73.6001	-232.871	-32.1215	171.922	-256.818	-333.754	347.434	-37.4591	-81.3402	-203.603
60	-95.4965	604.364	72.9599	418.827	84.0194	226.086	395.151	100.529	-19.6263	273.052	243.516	25.0144	-76.6747	367.151	566.51	-38.2244	95.1742	210.255	-23.0991	34.341	303.488	168.605	194.222	272.363	132.147	195.168	251.054	164.63	-16.0098	-11.7018	145.326	70.4018	275.738	213.016	-144.397	95.458	-65.6866	187.178	271.528	5.47269	3.48463	-0.84565	420.561	-32.6153	-247.873	90.263	-241.191	-115.075	-28.3121
70	53.8308	530.593	-54.793	108.296	-50.8471	583.556	428.384	327.946	-167.621	216.839	215.898	-141.23	210.992	44.0383	439.296	-60.4479	-229.59	91.4182	-82.1679	-143.508	59.7385	113.098	87.8898	524.556	154.761	231.77	539.307	192.756	150.898	145.736	129.226	510.198	374.309	-26.6353	-214.17	202.092	196.186	450.846	127.117	177.62	-376.869	-229.392	347.638	29.5294	-228.695	334.369	71.9412	-2.23338	-65.539
75	-51.8503	461.116	178.32	324.499	35.2655	464.956	393.287	158.033	-39.393	558.307	-3.58333	164.336	795.375	501.486	265.384	50.7928	211.462	270.19	114.398	79.494	169.047	253.049	-62.4541	417.491	136.445	237.528	189.424	360.277	86.9373	218.767	-55.495	245.993	275.334	88.2693	-53.4859	151.393	207.852	276.944	92.7945	-4.22222	-104.475	92.1672	267.595	-39.6848	-103.209	441.698	124.083	-174.418	80.2955
80	-105.884	360.394	91.8754	294.999	-319.114	166.733	496.954	174.114	52.3875	279.774	192.276	-60.1733	429.038	373.12	255.081	142.525	-7.60823	127.666	-112.612	251.951	133.167	398.699	-110.862	527.01	4.5873	158.279	233.065	235.045	28.1102	45.1191	161.777	364.009	165.656	177.094	-239.971	118.223	-114.227	462.785	7.43289	-39.2998	-120.667	65.0763	422.135	-173.122	-307.978	284.255	298.311	-64.1298	-29.1858
85	-197.369	552.082	-14.2901	192.427	-79.9569	458.74	501.318	203.252	70.707	318.166	73.2588	76.8823	242.119	201.816	177.314	78.0961	94.9456	34.0947	-158.498	64.5315	286.687	82.0294	-112.317	234.415	212.478	100.375	238.65	224.006	125.206	61.7613	300.172	80.1372	434.853	46.4358	8.88317	160.459	-56.6308	17.6654	27.638	64.7845	-76.9464	-52.7668	422.425	-226.459	86.3525	111.511	21.1607	23.0732	106.9
90	-97.0692	442.938	-5.67226	238.87	-168.375	39.203	453.249	196.946	12.1514	337.037	125.68	-23.5789	215.902	-51.7184	152.635	184.868	107.749	278.423	-139.657	-131.409	275.565	113.963	-99.134	429.693	21.2105	195.344	409.741	132.398	368.265	-123.589	-14.1488	45.7562	279.047	149.764	-86.3153	102.949	194.253	246.499	99.5058	141.874	-86.2992	128.847	405.434	34.2276	-109.31	-59.2944	130.444	-210.196	-29.8128
95	-287.606	359.69	40.2815	-143.466	-201.058	149.932	285.846	393.083	121.457	3.90416	58.875	-53.8733	248.516	-88.9514	-23.1652	-42.3205	15.9124	142.347	-301.845	-69.3707	325.865	50.5924	-170.855	119.234	186.717	-13.806	183.533	140.496	43.2653	-113.511	62.6649	-64.3121	128.072	29.8316	-322.752	75.3935	-187.725	359.424	37.699	148.729	-316.192	16.043	338.201	-233.818	-139.003	131.618	81.1731	-258.824	-352.801
100	-130.519	430.295	82.3407	122.566	-43.6089	337.847	374.785	297.767	122.805	182.648	103.521	-91.3065	173.25	260.405	164.908	158.907	42.5436	209.285	54.7143	58.9006	177.133	221.298	38.6204	200.143	158.407	71.9103	404.882	438.318	258.217	-5.0942	-22.5396	92.5364	378.13	39.519	-154.108	106.074	-174.805	217.602	93.7092	3.83333	-81.9103	13.0247	206.533	-167.957	-389.857	285.068	271.732	-120.805	44.5664
105	-38.3613	486.974	-106.031	214.065	79.1019	299.47	161.773	346.012	37.0125	341.805	74.5484	142.179	416.962	209.98	115.197	-105.231	2.85606	295.18	-14.4022	49.8955	263.388	219.514	-81.8315	544.638	311.344	85.0024	366.343	91.5459	171.769	-141.367	346.396	24.4852	366.498	98.9947	-128.76	171.778	279.803	62.6297	134.826	-38.0131	-82.6309	10.0809	215.935	-130.313	-308.29	272.39	291.964	-329.193	-148.585
110	-156.953	550.964	-138.719	287.605	-78.2109	226.31	202.781	161.366	80.4014	128.722	236.662	188.796	125.677	179.978	197.301	194.428	-124.9	107.749	-93.2618	37.1641	30.1198	220.422	47.9191	235.358	259.485	180.789	454.543	105.049	259.316	241.182	-63.4243	276.113	446.419	197.305	-205.369	-73.0197	16.8839	295.887	120.383	6.78655	-374.464	101.226	475.64	-30.3385	-133.063	25.631	200.908	-174.303	32.856
115	-248.707	393.625	-274.014	327.711	-134.63	-86.7404	350.875	206.137	31.0959	253.502	148.517	-217.677	406.966	36.2939	-135.179	-171.967	104.951	98.6391	-238.93	141.494	196.127	156.425	129.659	293.924	1.15079	291.358	326.141	236.922	104.439	167.152	311.945	-77.4407	380.175	110.496	-384.691	-3.10027	125.301	147.532	131.155	52.9687	89.326	-49.4072	549.136	-164.191	204.055	135.733	380.692	-440.419	-12.4262
120	-443.511	169.92	-242.567	-12.1813	-266.396	44.343	-171.585	34.7727	-273.858	3.95189	-72.2857	53.5838	6.71591	156.947	-108.17	-101.954	-106.187	-32.2874	-327.331	-97.6193	136.797	71.2487	-277.946	202.98	-100.722	-103.208	-88.0803	5.60145	53.3435	-58.5151	48.27	-20.9346	160.801	-92.7643	-447.415	253.205	142.282	-134.346	17.1927	-260.851	-427.41	235.657	335.754	-233.985	-4.06404	-83.9089	21.9833	-349.313	-102.256
125	-357.9	162.189	-231.86	1.25	-285.391	-187.849	93.8464	-128.537	-143.569	-93.924	43.6465	-87.0753	-55.99	-65.4983	-20.7423	-336.648	-248.387	-183.385	-307.484	-401.322	-25.6252	-37.2024	-348.844	228.866	-185.769	-51.2994	-122.582	-300.455	15.8435	-42.5458	94.44	-509.027	-152.556	-275.598	-423.593	-108.777	-320.072	217.314	-180.637	-131.666	-201.302	-425.371	219.296	-312.596	-183.94	-190.079	-112.944	-349.262	0.75355
130	-545.931	-15.55	-424.016	-345.447	-500.146	-36.8654	30.1176	-176.84	-389.21	63.5435	109.119	-293.966	-67.4595	79.1508	-180.429	-228.683	-169.316	-143.683	-471.019	-167.234	-46.6381	-55.2357	-321.388	34.3647	-218.214	-266.024	50.7614	-236.467	-181.221	-320.51	-99.2474	-258.529	-107.938	-441.44	-664.3	-110.412	-393.901	106.588	-268.56	-277.576	-133.222	-236.12	-68.4969	-382.805	-414.517	-72.5	-144.948	-305.936	-241.046
135	-353.348	322.845	-396.582	-101.105	-431.28	-117.378	62.7214	-215.032	-82.4917	-44.2789	-150.453	54.4578	-426.113	9.84959	-314.76	-293.051	-135.404	-128.326	-306.578	-152.469	-61.1063	-148.972	-380.593	169.765	-536.967	-162.919	33.8426	74.7237	28.1502	-164.516	-157.637	-325.414	-93.6806	-136.244	-753.922	69.3251	80.862	-291.748	-161.529	-34.2632	-498.817	-258.104	174.79	-161.839	-190.064	-90.0948	-81.1272	-389.003	-53.0854
140	-434.228	410.933	-184.126	-182.596	-272.01	-203.574	62.0411	-19.2006	-158.71	-58.4246	9.22273	-111.004	-384.056	44.8657	152.02	-204.157	-63.9892	30.4318	-520.004	-58.4137	99.2292	64.3092	-203.055	180.629	9	65.2714	87.4837	324.923	271.26	-85.5772	169.046	-225.085	64.655	-63.2971	-462.664	-79.8139	-312.13	83.8266	16.134	-307.089	-43.5491	-125.638	222.537	-157.656	-749.438	0.89714	329.646	-299.471	-147.314
145	-132.36	240.609	-397.328	53.1422	-412.852	-63.0876	162.148	-116.939	-231.71	143.291	182.504	-64.7482	76.6445	115.121	5.10145	115.373	-191.129	-151.751	-444.452	142.341	45.2467	104.595	-319.388	230.623	-97.6936	7.42496	347.039	42.8973	296.371	156.858	38.94	-151.076	228.456	-28.7602	-335.564	-30.4464	319.177	72.928	13.0813	-97.038	-210.488	-186.195	103.872	-208.052	-34.5071	-77.6544	40.4015	-134.046	-217.102
150	-305.655	350.292	-34.3627	104.77	-271.248	-56.3188	181.485	37.2739	-37.6263	-110.766	173.223	-56.2763	-151.33	376.597	-63.4351	-32.8563	-81.7537	66.9809	-371.391	-43.8516	-44.3633	49.2893	-348.504	238.513	-50.6449	115.144	306.448	146.697	190.991	270.151	149.63	-80.9815	165.429	-226.051	-423.622	60.8763	103.532	-63.8257	4.41524	-77.0972	-240.144	-23.6178	52.4734	-141.223	184.393	171.415	19.5608	-390.415	-97.761
155	-244.36	216.643	-66.8541	223.128	-375.04	22.6743	228.142	159.647	-114.337	54.5635	-13.2759	-183.658	-45.3174	-23.888	81.7101	38.0208	-138.731	27.2103	-761.023	-195.576	47.3628	147.592	-205.703	295.424	-63.7606	40.1786	203.588	17.2302	56.0479	-32.7598	343.196	-162.364	-5.78591	76.8326	-476.615	-44.8214	-35.7807	166.192	-60.6884	-40.6139	-420.767	-114.506	141.92	-206.956	-106.889	103.652	259.768	-84.4996	-54.459
160	-470.166	140.627	-16.589	56.3845	-528.866	-22.3775	241.793	-168.478	90.4755	-133.471	-77.4074	-223.071	-140.838	-13.2555	-128.585	-263.506	-82.0314	131.906	-336.042	-159.94	14.7368	-35.7271	-342.773	115.106	-296.657	-6.34689	-88.5071	-126.922	-59.6637	-436.724	-55.9288	-302.364	-147.892	-48.2936	-319.542	20.8661	-234.805	139.908	-145.773	-123.077	-355.221	-230.756	389.357	-205.647	-358.857	-230.84	13.0312	-245.611	-173.24
165	-524.7	710.287	-355.3	-102.138	-273.805	108.361	102.72	-41.6973	-19.6097	57.381	-7.30833	32.9007	-295.156	30.913	-213.46	-50.0513	-174.412	-144.467	-504.673	-16.3447	117.614	138.676	-315.027	410.858	-174.471	65.4341	85.2499	-149.931	233.083	-180.066	-73.9288	-72.2262	66.8453	-47.121	-376.453	64.8539	-84.4607	-239.692	-101.065	-153.816	-263.951	-225.079	229.816	55.2273	-450.064	-10.1912	162.639	-251.774	-82.0735
170	-210.232	396.276	93.6445	252.565	-110.231	163.422	186.727	120.254	-33.52	118.567	5.84836	-44.1889	-110.641	113.551	101.381	22.3011	40.3936	257.719	-236.005	92.3757	-35.8314	247.475	-45.7463	420.457	-128.421	82.0444	99.2956	166.247	111.645	37.6859	292.936	51.1852	257.328	-12.4349	-350.94	299.9	293.509	182.964	168.474	3.51944	-50.7239	-160.087	356.748	8.06872	-291.17	262.615	121.17	-168.682	38.4518
190	-227.488	407.904	52.8474	294.911	-36.1845	204.218	504.383	77.0811	151.056	411.405	268.539	-104.299	-118.726	111.111	9.81422	-68.6364	-147.565	74.1035	-40.2295	168.634	80.6571	-2.01513	-193.524	536.9	-222.063	243.598	334.525	108.209	458.265	-99.0392	150.13	-77.2462	317.787	213.985	-546.093	110.305	-151.029	179.208	108.427	-47.2908	-119.173	-141.525	263.893	63.2929	-485.914	158.89	140.298	-96.9031	-120.731
195	-232.353	594.781	-111.547	231.989	-17.0893	165.643	240.079	311.356	218.472	34.7214	323.234	-64.175	95.2024	183.488	14.8348	201.1	-260.374	127.047	-21.8744	238.304	353.75	134.343	-162.138	266.515	-322.798	-25.7981	286.382	308.482	305.67	-58.2833	237.876	-66.9115	130.735	183.029	-298.812	175.379	73.5664	-54.0012	78.736	-64.4434	-22.1075	-174.761	148.881	-75.8063	-252.71	66.3101	-107.875	-244.287	171.867
200	-264.808	449.181	-85.7868	21.2034	-130.578	338.568	189.588	303.638	-28.4222	511.37	258.217	-117.753	141.283	154.538	76.7319	117.695	-11.3064	263.269	-62.1035	128.043	163.981	86.7504	-101.591	398.662	-347.144	185.587	169.327	419.761	202.823	-299.09	343.548	39.3102	85.6021	82.1002	-448.353	-54.9782	-68.8518	211.527	19.4096	43.5903	-74.036	-294.085	350.67	-119.919	-290.798	303.543	351.081	5.12112	-62.4821
205	-104.364	421.583	138.717	233.892	-192.412	181.491	304.922	313.088	-34.4597	282.864	236.207	151.562	-56.1428	235.686	-96.1843	413.333	-142.233	143.34	-90.7855	230.082	90.6456	2.36955	-284.686	485	-60.4265	-102.892	357.911	253.705	285.245	214.492	252.273	-66.6448	265.205	200.337	-375.45	3.72403	218.088	-158.948	49.0189	-183.087	-122.596	-99.1505	226.336	161.502	-388.971	299.969	183.342	-387.047	131.809
210	-380.621	627.724	-7.06521	101.867	-275.899	271.376	576.264	206.218	293.619	495.046	163.667	-151.186	35.8745	94.825	-64.2047	15	-269.939	357.398	98.5934	488.09	12.7455	20.2643	77.4191	530.947	-124.885	91.9712	512.529	273.149	197.81	164.879	145.404	-196.034	352.309	155.375	-478.475	62.2421	126.671	64.6727	-7.39589	-161.954	-103.048	140.322	409.608	-54.6244	-377.706	62.8957	122.181	-373.174	-361.132
215	-160.855	688.922	-56.7534	267.418	115.023	248.309	205.251	385.452	225.29	205.666	274.938	41.6114	101.506	-69.5256	248.184	-213.635	-359.692	74.1516	-174.564	305.513	247.265	156.852	26.8757	490.814	-89.1633	169.622	105.642	435.156	43.6965	178.269	194.27	-182.956	251.35	142.135	-280.037	60.2978	-25.6399	-66.2783	7.70357	-21.4722	-319.129	-20.2695	162.058	26.7879	-174.779	155.522	-171.568	-176.376	24.107
220	-260.226	570.931	-273.09	193.95	-9.68112	105.742	175.56	262.035	-150.367	308.174	171.817	68.9838	9.64448	36.9302	-104.944	-270.806	-25.8905	286.774	-16.5596	111.865	142.696	102.03	3.97745	168.594	22.6056	65.2363	248.029	53.5132	74.1612	-6.72807	100.007	-98.6633	26.2029	72.2732	-705.304	-4.19855	-221.629	39.8947	114.181	-288.028	-267.909	-110.924	198.156	49.4767	-388.685	83.469	398.793	-167.053	82.1112
225	-16.6079	726.544	-66.3714	269.042	-351.089	209.241	259.602	42.1219	256.179	263.875	221.343	-86.2261	41.8883	100.237	143.886	23.8718	-240.668	-7.67453	217.627	156.744	194.317	57.4014	-45.6566	126.436	-19.0938	30.675	107.091	36.0652	202.18	-3.51418	-105.71	76.8483	355.667	158.753	-528.764	49.006	-225.516	-145.038	-28.478	-153.011	19.4719	17.5801	70.8267	-148.829	-289.728	76.9239	28.4741	-11.8902	-155.344
230	-220.614	598.754	74.2012	103.763	3.87662	363.699	162.462	261.607	-109.981	257.447	31.2143	-68.0168	69.251	228.577	-24.3216	268.12	-60.7137	139.584	267.343	299.255	141.481	138.734	-91.3801	233.113	-142.485	-149.613	320.667	179.827	125.565	-161	-8.05182	-128.138	128.446	241.188	-384.086	-64.026	-244.682	-216.699	178.361	-263.952	-255.465	-25.8128	206.723	-172.552	-198.757	227.574	87.723	-115.023	173.24
235	-395.384	482.914	-124.794	187.755	-5.41429	106.635	174.254	363.176	128.124	523.103	114.536	258.124	-144.587	131.758	-2.70088	179.722	-131.76	50.6635	141.949	66.4929	83.7417	191.095	-234.906	193.711	-588.745	-222.567	91.9314	61.8696	-1.96202	-155.275	194.278	-1.26994	287.419	120.111	-40.6457	35.9776	-8.26885	-53.3514	-6.74399	-178.043	-367.321	20.4164	212.57	-138.971	-203.115	316.562	116.936	-175.515	5.61636
240	-57.5623	595.062	-144.869	44.6266	-215.409	94.0284	324.809	177.137	-270.085	125.149	240.803	23.3234	-186.83	-6.46371	-219.753	166.605	-85.6752	18.8947	-177.035	67.3053	33.1957	-34.8796	-49.7963	257.145	-113.828	-114.351	328.252	139.446	57.5583	-271.941	181.63	-27.0857	214.218	-7.22277	-248.131	-49.7888	-188.417	-253.132	200.748	10.7064	-353.21	-216.5	346.129	-124.147	-235.371	47.8094	-107.083	-320.707	-150.24
245	-68.18	435.621	-119.453	100.227	-271.518	208.789	77.4478	150.576	-95.3668	280.869	36.7857	97.4219	30.9133	-102.808	158.033	196.55	-26.4654	14.1337	195.238	308.317	119.329	125.114	-42.4411	231.566	-17.0887	108.206	404.679	211.362	44.3528	-1.22727	99.6836	-213.602	183.232	103.62	-353.23	-16.5873	-206.471	50.3868	-49.867	-176.677	-267.016	-211.916	182.345	-203.755	-283.09	64.8626	189.403	-359.619	-297.292
255	-140.116	505.123	-309.755	254.002	-274.099	89.063	225.112	428.886	134.776	335.582	74.9693	153.43	-27.4841	126.847	-9.32712	274.058	-63.878	153.365	71.1368	370.531	130.49	-27.0547	-118.063	45.8553	-312.433	-126.185	210.033	325.151	130.919	-127.412	45.0367	-35.7746	222.693	-8.35193	-413.136	-203.712	313.719	-61.5257	-130.453	-333.989	-263.426	-119.589	248.286	-69.8539	-199.167	183.732	39.5917	-298.652	-347.878
260	-87.0817	649.466	-167.5	-3.35611	-389.293	-19.4996	269.99	163.819	-205.628	153.962	182.786	-12.2925	-116.09	192.794	304.513	89.7841	-81.0297	94.2614	153.237	275.353	-70.0706	214.362	-235.772	223.397	-41.5763	-109.914	275.533	344.062	211.68	-102.227	42.4602	-58.8022	269.606	34.7398	-557.332	-16.8257	-11.5766	-132.817	-76.0864	-97.2991	-363.455	11.2923	215.456	-296.758	-401.128	110.936	-222.776	-165.446	-68.9902
265	-101.705	563.981	-401.731	236.392	-100.506	-34.8562	183.121	307.512	-85.5781	270.594	-59.9858	115.753	164.2	116.814	-120.167	-21.5952	-85.632	275.74	-17.4026	-200.826	46.1417	54.6172	-231.863	392.742	-181.866	-228.59	167.665	57.4891	-4.23556	164.987	60.98	-214.321	233.119	22.8195	-441.678	-143.971	-174.783	-200.215	-196.212	-318.68	-370.221	-319.76	197.312	-63.0758	-454.052	62.0116	420.845	-590.052	-178.49
270	-158.474	418.4	-100.731	208.881	-333.223	117.622	291.105	277.227	56.6129	235.121	42.6121	-59.2757	79.8185	-10.8841	-89.3473	169.402	-113.905	229.328	289.587	25.9779	109.848	282.666	-20.5046	222.621	-287.851	-78.6564	196.127	-9.13665	81.0004	-121.417	-22.6973	-300.172	220.679	-193.628	-195.703	118.324	-235.212	-149.135	-159.097	-395.652	-347.388	-289.356	216.674	-192.318	-478.982	-147.722	-96.6875	-244.9	-368.19
275	-359.103	418.847	-239.445	42.9038	-458.132	169.844	159.993	-26.1182	-46.5525	170.075	66.9303	-127.293	106.26	-60.1063	113.459	109.385	-20.6283	51.115	140.412	137.027	-31.9851	239.909	47.8198	192.3	-291.044	33.7625	232.678	68.1393	19.4839	260.314	110.523	-139.461	228.491	-184.826	-715.496	10.8601	-289.695	79.0817	-233.363	-214.276	-305.988	65.139	189.39	-373.524	-361.475	11.0129	242.8	-171.456	-211.077
280	-153.406	392.412	59.6781	43.2235	-105.013	94.1579	233.67	177.675	-84.5877	16.5801	89.8966	85.2957	-20.3619	78.1866	-41.9149	60.75	-17.1894	-68.0592	-181.556	182.538	177.94	45.9991	-56.6187	343.154	-542.292	114.84	129.236	73.5681	68.3343	23.9546	-43.4139	-294.613	39.1387	-231.009	-465.998	-155.664	-250.451	-239.135	-137.972	-166.482	-358.892	-71.832	152.227	-272.656	-422.717	119.88	-60.2353	-187.283	50.3338
285	-541.436	163.142	-385.46	-428.436	-642.042	-184.267	-93.1245	-173.834	-64.2391	-149.776	-176.182	-202.747	-562.481	-244.21	-184.986	36.1045	-339.267	-187.506	-501.712	-40.5773	-133.161	109.887	-408.536	-172.078	-662.291	-348.201	-46.3725	-291.986	-208.641	-123.4	-174.105	-440.788	-127.815	-249.974	-847.682	-251.818	-208.161	-175.712	-211.783	-379.666	-436.337	-125.362	28.5038	-376.622	-604.809	-226.401	-98.6452	-328.59	-330.312
290	-446.921	105.704	-415.639	-130.425	-682.301	-185.617	1.24913	84.4878	-41.8625	-147.086	-192	1.73988	-344.784	-327.68	-276.274	-147.037	-175.631	-188.602	-312.095	-111.647	-58.8998	-1.24212	-548.335	-71.6591	-431.963	-299.894	-221.727	-108.174	-203.77	-102.806	-110.515	-479.223	-33.6678	-582.59	-249.722	-309.141	-329.464	90.594	-232.658	-471.152	-461.295	-90.9386	19.4577	-411.059	-460.686	-233.188	62.6144	-593.908	-191.978
295	-389.321	271.787	-273.807	-422.439	-473.667	-137.457	-27.6049	259.576	-236.154	38.8156	67.025	-143.773	-266.519	-41.8354	-435.399	-283.158	-237.236	-19.4247	-364.69	-315.186	72.0133	-33.0312	-176.953	95.3965	-504.6	-363.014	-30.8652	21.7871	-129.295	-346.033	-177.841	-402.136	-162.567	-412.882	-709.424	-124.246	-211.799	-223.201	-205.535	-586.696	-441.977	-167.367	265.926	68.3485	-648.607	4.72641	95.0192	-348.488	-127.312
300	-266.702	324.802	-274.386	-179.616	-510.441	-205.24	27.5646	108.101	-179.972	-86.0093	-146.803	-113.659	-69.6591	-216.736	157.694	-169.851	-377.473	-42.5224	-425.665	-3.34314	-1.87439	125.56	-297.218	80.9911	-681.145	-86.7147	-25.3685	-235.599	46.2002	-253.162	-64.77	-434.57	-187.146	-216.056	-741.952	-22.5381	-211.16	-240.23	-202.706	-371.481	-221.171	-196.82	-89.5976	-175.818	-675.898	-33.1658	-173.188	-509.812	-227.023
305	-504.722	161.922	-224.372	-155.411	-409.633	-80.138	-55.2685	194.675	-202.912	-41.4252	-47.5636	-336.452	32.7963	-142.872	-288.259	-57.9298	-425.964	28.9875	-507.29	-54.8062	6.01406	-14.2201	-366.771	55.9734	-381.27	-364.064	-6.12745	-23.4457	-81.0536	-166.162	-220.839	-250.025	-43.0859	-266.217	-376.339	-127.338	-235.297	-95.4376	-132.117	-183.472	-255.258	13.9297	128.804	-368.278	-210.19	-102.62	7.55833	-515.647	-48.5805
310	-418.752	215.843	-434.96	-79.1134	-418.766	9.10765	163.888	102.136	-2.11593	190.956	38.1471	12.4108	-51.6716	344.626	-86.7241	-10.5238	-85.5277	-84.0642	-551.51	-9.47264	5.67524	-83.9357	-171.318	232.468	-315.814	-129.051	101.675	-145.848	-53.3672	26.3904	-161.28	-279.874	67.8005	-133.035	-365.083	93.6872	-151.221	-20.0068	5.84643	-190.074	-280.393	-55.6294	96.0827	-128.476	-520.443	3.2657	253.536	-245.746	-1.99801
315	-214.818	378.361	-179.563	-59.9596	-395.054	28.9864	172.493	98.9102	205.842	165.851	7.88889	-45.8553	-28.7841	106.523	153.718	216.379	-152.28	140.315	-416.672	57.8266	13.82	128.377	-213.976	44.1316	-188.414	-221.215	249.505	-67.0756	19.5284	-109.848	-134.778	-192.481	88.6882	-366.185	-343.874	-241.564	20.7543	-12.9774	-66.7792	-219.304	-405.274	140.168	158.448	-601.227	-422.329	76.9289	263.47	-324.876	-175.561
320	-492.487	-13.5446	-488.722	-486.113	-678.04	-271.413	-162.896	-160.803	-295.271	-314.102	-98.1731	-128.753	-151.659	-312.545	-496.056	-200.109	-446.605	-277.041	-492.622	-150.47	-337.595	-128.094	-790.681	46.5432	-808.216	-450.005	-195.443	-221.11	-316.817	-414.158	-483.115	-239.084	-144.886	-223.556	-612.011	-443.587	-112.857	-567.216	-352.441	-697.383	-536.816	-426.168	-191.368	-666.818	-832.94	-151.59	62.125	-578.656	-103.093
325	-528.469	42.5	-389.964	-219.198	-683.403	-290.769	-27.6085	-101.6	-107.341	-95.5738	-125.768	-169.307	-211.016	-339.801	-222.171	-209.211	-256.071	-343.293	-107.263	-24.9216	-251.768	-15.012	-243.8	-112.537	-398.213	-336.154	73.4374	-274.187	-78.1102	-115.42	-252.696	-457.809	-116.668	-613.314	-509.978	-233.829	-115.218	-446.647	-204.795	-332.82	-214.504	-52.0599	-75.2732	-730.364	-481.857	-242.413	-416.112	-629.925	-185.128
330	-633.584	70.1429	-460.052	-358.522	-707.414	-373.078	-166.004	-75.856	-223.736	-376.24	-140.548	-187.257	-496.979	-324.039	-203.421	-219.812	-569.802	-274.312	-570.201	-168.967	-232.42	-123.172	-592.922	-228.684	-594.142	-342.984	-183.049	-67.7874	-218.708	-526.446	-434.24	-578.331	-38.2397	-504.34	-664.83	-394.031	-186.459	-626.358	-320.636	-550.263	-534.363	-113.002	-72.6298	-585.6	-687.495	-349.553	-216.727	-482.513	-324.908
340	-426	294.385	-517.477	-125.62	-625.696	-334.433	101.914	-3.75046	-128.633	-208.026	-239.527	-293.572	-449.629	-433.355	-188.829	67.2994	-670.719	-178.675	-319.897	107.899	-224.357	-48.6568	-423.878	186.135	-490.527	-122.98	-88.3507	-151.645	-82.0747	-338.133	-245.351	-272.161	-90.967	-279.75	-689.074	-114.779	-317.001	-352.922	-215.358	-201.885	-553.216	33.8672	140.613	-565.11	-551.67	-88.4149	-54.4549	-415.805	-259.184
345	-329.597	318.064	-294.4	-150.356	-566.109	-87.7992	104.535	27.4612	-117.325	59.7027	-34.879	-86.8697	-29.1149	109.043	-151.669	-50.0909	-347.202	-324.749	-41.496	97.3039	-48.9481	29.2496	-409.344	201.6	-352.441	-249.004	55.9608	-40.9175	-35.5379	-195.539	63.8751	-380.99	152.925	4.0672	-784.48	-160.279	107.511	-187.221	9.83524	-133.903	-286.558	28.8616	90.1873	-505.114	-568.555	179.829	-160.559	-330.305	-249.754
350	-243.786	432.518	-255.977	-91.2331	-270.363	3.15177	97.5167	28.6269	-134.736	-143.829	115.023	-93.8242	-259.389	-37.087	-18.5804	-131.357	-449.531	43.2248	-378.496	417.868	-9.20333	82.3143	-175.629	335.572	-235.492	-154.902	-28.2503	-59.8986	-4.83293	-42.3821	-76.5609	-193.589	-130.238	-66.0507	-514.074	-154.214	-130.354	-106.286	-186.439	-218.919	-376.227	123.7	-26.7958	-264.525	-565.166	-58.2589	32.1897	-199.298	-277.88
355	-206.808	327.817	-195.916	-105.618	-243.683	51.3578	14.2106	129.469	-121.21	-129.426	68.1607	-200.097	12.0552	75.2093	-6.49659	70.4301	-290.747	-109.828	-1.56566	226.353	-46.5514	-46.9381	-379.656	-12.4605	-111.273	-35.6154	80.7499	184.152	-10.7686	-287.864	77.5545	-150.648	15.3133	-89.2524	-325.857	-264.468	22.3469	250.437	180.812	-189.088	-377.956	248.755	212.209	-435.726	-354.774	-68.6649	-100.583	-227.822	-153.585
360	-533.663	145.941	-434.317	184.751	-190.351	-44.8378	180.936	172.241	-31.6456	-155.204	57.0259	-39.3642	37.0546	54.7517	174.007	23.2833	-442.778	-75.9216	-307.682	271.943	-8.21929	143.043	-76.1243	54.4875	-102.625	-217.352	69.0025	20.8804	-119.399	-68.2793	127.92	-72.8386	111.343	-193.234	-404.383	-143.504	-290.512	71.5817	-89.9349	-154.455	-165.238	-34.7016	213.345	-426.747	-524.18	40.0018	-108.047	-333.186	-91.3463
365	-222.898	472.992	-295	-236.733	-344.883	17.7355	42.792	216.418	-120.059	-27.9497	92.8333	-214.688	-132.179	-54.0162	-121.803	-72.1042	-184.665	-111.06	-384.334	145.907	-8.76951	178.494	-361.193	210.945	-284.803	-113.99	164.561	74.9869	108.304	-101.671	-121.313	-279.959	109.378	-117.932	-335.097	-298.317	-342.541	-18.2632	-133.213	-68.6686	-386.905	81.0151	-73.6953	-613.201	-450.513	-204.426	46.0833	-205.826	-399.638
390	-360.254	18.7182	-454.927	-379.278	-638.135	-128.608	70.9716	75.421	13.0528	-83.5481	-193.612	50.541	0.85384	-255.639	-210.759	-587.463	-474.966	-64.8908	-463.031	-10.3516	-38.8881	-207.324	-348.758	-36.291	-424.233	-433.156	-342.118	-232.924	-147.921	-378.005	17.5282	-338.737	-212.184	-428.967	-594.933	-318.379	-134.475	-172.277	-270.337	-291.798	-680.583	-103.976	-88.7589	-571.854	-482.774	-9.17243	-84.864	-400.814	-263.641
395	-447.191	-118.791	-578.858	-280.036	-548.339	-444.635	25.5939	-230.683	-170.61	-122.236	-352.454	-13.567	-171.454	-342.055	-313.684	-326.667	-433.176	-369.153	-625.091	-76.726	-166.552	-117.761	-583.716	133.4	-342.53	-490.982	-116.346	-270.504	-65.7198	-259.504	-207.921	-511.17	5.26472	-734.011	-503.577	-479.981	-201.93	-358.395	-105.634	-466.491	-440.888	-103.363	-37.3873	-644.63	-413.569	-122.252	-48.8452	-394.317	-260.7
400	-685.079	-67.9262	-764.812	-695.341	-576.816	-622.115	-230.352	10.5553	-375.937	-300.501	-315.478	-388.575	-464.99	-248.65	-470.191	-500.353	-738.482	-277.68	-519.057	-288.533	-295.017	-215.861	-697.244	-94.171	-1005.7	-504.474	-455.6	-433.112	-330.95	-460.506	-144.459	-479.198	-310.147	-643.132	-781.671	-419.346	-595.248	-168.904	-470.858	-397.579	-534.845	109.074	-225.371	-651.323	-711.889	-387.764	-377.48	-504.755	-268.704
[truncated: 37 more columns]

## Sheet: DtolC_Stat phase_2
Time (s)	1 bg subtracted unnormed	2 bg subtracted unnormed	3 bg subtracted unnormed	4 bg subtracted unnormed	5 bg subtracted unnormed	6 bg subtracted unnormed	7 bg subtracted unnormed	8 bg subtracted unnormed	9 bg subtracted unnormed	10 bg subtracted unnormed	11 bg subtracted unnormed	12 bg subtracted unnormed	13 bg subtracted unnormed	14 bg subtracted unnormed	15 bg subtracted unnormed	16 bg subtracted unnormed	17 bg subtracted unnormed	18 bg subtracted unnormed	19 bg subtracted unnormed	20 bg subtracted unnormed	21 bg subtracted unnormed	22 bg subtracted unnormed	23 bg subtracted unnormed	24 bg subtracted unnormed	25 bg subtracted unnormed	26 bg subtracted unnormed	27 bg subtracted unnormed	28 bg subtracted unnormed	29 bg subtracted unnormed	30 bg subtracted unnormed	31 bg subtracted unnormed	32 bg subtracted unnormed	33 bg subtracted unnormed	34 bg subtracted unnormed	35 bg subtracted unnormed	36 bg subtracted unnormed	37 bg subtracted unnormed	38 bg subtracted unnormed	39 bg subtracted unnormed	40 bg subtracted unnormed	41 bg subtracted unnormed	42 bg subtracted unnormed	43 bg subtracted unnormed	44 bg subtracted unnormed	45 bg subtracted unnormed	46 bg subtracted unnormed	47 bg subtracted unnormed	48 bg subtracted unnormed	49 bg subtracted unnormed
0	0	0	0	0	0	0	0	0	0	0	0	0	0	0	0	0	0	0	0	0	0	0	0	0	0	0	0	0	0	0	0	0	0	0	0	0	0	0	0	0	0	0	0	0	0	0	0	0	0
5	45.24	-126.05	-274.115	-298.663	-226.556	-401.863	-136.711	-147.714	-331.746	-292.854	-144.84	-255.565	-237.425	-159.048	-257.651	-177.356	-173.289	-610.875	-358.12	-333.127	9.39731	-265.787	-391.275	-39.8197	-435.592	-75.3377	-122.589	-99.4247	-35.5657	-368.776	-204.448	-299.17	-490.357	-213.378	-365.15	-198.575	-125.006	-495.587	-676.498	-196.892	-81.1349	-121.427	-322.954	-258.025	-71.9217	12.3265	-319.737	-383.454	-236.432
10	215.535	58.7318	-9.16208	-206.511	49.0081	205.509	-40.0993	-81.9794	-219.782	-39.7527	125.018	96.2732	26.4619	138.766	15.8603	42.2315	-46.1867	-310.246	-87.8831	-81.8961	-37.0027	221.543	24.5664	91.9932	138.346	6.28999	77.7574	138.11	61.7306	-33.9702	23.8637	-144.6	-242.534	3.7052	-353.591	114.675	121.529	-206.404	-264.324	-82.438	137.91	249.72	237.502	-62.4135	-117.193	206.651	-118.632	-65.0472	293.225
15	237.977	257.382	344.09	29.3048	416.079	205.118	204.312	-61.7976	180.667	23.0961	218.881	174.825	-54.0247	184.289	171.688	-43.3585	120.539	-136.127	280.515	117.54	252.95	159.959	-14.4801	449.155	123.536	168.285	300.934	309.68	110.831	176.653	334.483	-56.9859	22.0129	302.375	-59.2007	241.882	390.463	-15.1926	-90.2698	93.142	269.72	296.895	610.579	158.045	288.59	345.527	-33.2379	72.0102	53.8553
20	606.25	670.566	348.568	312.417	728.95	264.861	665.541	159.113	205.928	149.908	451.327	602.527	422.049	269.67	206.77	413.026	392.755	469.909	668.636	444.219	110.821	508.266	511.156	365.468	400.568	323.273	709.612	621.772	453.178	435.955	574.22	-105.476	159.014	493.874	73.2223	409.069	579.429	404.101	-357.913	352.798	514.588	464.154	480.165	282.297	354.296	456.894	433.832	332.661	552.776
25	542.643	536.61	434.273	543.666	584.508	763.875	545.487	467.483	375.901	272.548	613.562	488.905	201.515	378.329	439.655	418.209	455.802	237.871	724.547	489.484	422.717	330.268	435.752	299.472	465.334	610.36	559.954	524.938	599.83	315.947	577.605	122.08	227.3	216.799	324.765	371.482	565.356	349.778	-281.508	441.942	561.86	532.405	732.163	864.239	605.867	637.375	575.178	359.819	683.276
30	832.16	591.721	596.511	185.337	708.94	242.35	416.55	351.929	251.726	321.129	436.56	701.674	264.911	473.318	336.421	280.397	280.375	413.899	722.89	674.255	210.339	456.966	407.122	707.07	529.027	362.249	647.303	826.2	709.884	468.535	913.11	189.786	150.4	429.499	298.983	595.557	828.578	194.104	-187.024	487.178	453.519	517.234	545.575	573.168	510.721	874.785	458.052	421.711	512.737
35	1049.81	711.648	489.367	199.991	569.656	439.447	314.321	356.56	299.407	296.688	671.071	526.025	439.946	452.439	494.815	440.528	347.493	350.563	641.292	492.911	397.745	456.204	513.834	485.6	778.665	684.997	639.76	697.355	396.752	590.569	690.459	230.699	162.795	214.236	123.588	253.938	676.596	240.146	-320.748	519.257	327.398	666.943	753.41	392.936	326.542	609.62	364.572	385.442	655.586
40	960.46	676.846	409.724	287.163	632.702	525.304	576.603	430.528	507.379	162.505	539.435	431.989	375.82	380.404	347.807	398.702	259.904	319.465	759.18	603.01	569.993	456.083	571.424	429.142	461.725	485.247	736.461	666.797	620.517	500.287	634.967	560.745	55.4437	383.959	250.161	542	707.996	220.869	83.8444	483.953	449.773	645.506	1048.64	328.557	557.296	637.119	237.172	535.748	603.947
45	782.86	512.963	375.954	399.734	567.545	445.832	506.917	140.95	-114.793	216.386	478.012	531.867	13.407	368.367	400.563	530.751	411.549	335.77	692.073	623.773	457.46	564.239	527.436	591.951	635.119	236.702	677.948	509.503	460.376	390.738	477.61	230.171	121.815	152.462	225.789	761.605	336.801	220.021	-142.073	251.484	255.51	512.275	388.507	582.947	523.455	859.227	558.264	423.986	713.327
50	1021.92	675.308	586.036	289.935	334.737	355.099	375.087	287.217	136.834	156.018	555.131	881.749	365.458	538.208	322.465	496.795	407.184	182.801	673.291	373.595	833.622	677.247	457.132	467.034	625.84	218.309	505.531	836.579	844.084	623.459	676.76	34.0664	428.534	517.255	230.731	475.868	640.111	457.305	-210.111	407.432	217.945	362.376	381.617	455.947	464.737	460.163	461.611	376.702	986.146
55	947.591	786.784	400.506	303.545	655.24	278.213	484.665	356.085	316.909	307.707	473.984	636.132	515.977	392.022	528.33	426.123	461.239	282.212	599.619	528.003	691.684	636.693	545.605	390.573	700.147	386.673	489.906	550.538	870.134	705.912	526.275	460.238	-50.6131	239.172	411.606	499.773	742.356	427.539	-155.681	389.569	404.809	733.158	761.357	599.767	499.051	546.126	527.442	494.409	662.803
60	944.843	744.7	497.911	344.154	703.567	526.331	602.509	450.763	340.624	542.807	532.595	585.3	453.279	359.224	247.743	272.946	294.893	327.087	473.908	553.209	663.234	370.076	500.938	471.52	835.884	635.987	614.855	491.55	591.744	478.973	712.993	549.065	-22.2082	155.557	231.424	476.057	671.08	379.903	-200.276	505.759	346.368	513.006	468.948	425.577	636.561	429.524	485.908	462.561	856.794
65	515.304	551.58	520.233	-17.5102	849.182	525.507	486.929	278.688	140.074	279.965	370.435	662.936	234.236	577.997	220.36	346.934	432.565	356.236	634.629	352.781	442.061	368.028	407.212	359.73	714.759	404.666	574.908	629.411	556.62	354.517	486.424	278.634	-38.1843	318.456	-17.8096	635.455	535.627	374.077	-387.713	395.413	178.817	504.107	308.161	454.368	472.166	479.884	307.306	419.745	699.223
70	613.52	771.882	529.994	160.918	787.808	532.411	634.946	388.536	259.468	394.652	542.407	824.045	422.614	555.815	292.022	328.697	469.498	310.409	587.719	513.891	434.126	302.576	370.631	550.972	847.597	622.907	642.62	408.01	447.041	434.754	565.005	232.852	109.512	70.4659	199.681	584.593	700.169	438.4	-128.556	404.247	457.926	512.743	529.007	683.605	400.849	474.277	346.292	448.452	750.436
75	768.41	829.134	559.806	210.626	673.854	455.869	558.767	473.082	260.801	305.739	604.157	723.274	331.466	519.895	98.6193	369.105	169.049	94.5944	503.058	454.003	403.713	427.437	298.501	451.514	611.532	512.261	662.664	446.447	756.409	629.005	696.773	161.008	226.728	383.636	375.648	502.057	643.92	340.095	-148.913	455.76	467.219	716.412	721.635	505.232	556.073	462.874	468.178	508.065	836.863
80	776.697	643.824	504.504	247.587	469.43	578.629	417.808	236.494	142.59	406.605	560.735	840.685	370.685	446.325	294.356	392.475	212.398	220.743	684.854	527.734	476.068	238.929	442.462	377.101	484.549	420.835	477.411	441.485	607.514	670.39	511.446	289.554	113.76	368.245	214.368	485.625	734.577	296.073	-248.306	364.606	547.116	545.341	703.908	448.857	374.426	582.384	448.409	426.379	849.82
85	609.213	503.616	246.059	206.978	479.862	420.829	237.541	249.788	297.99	191.272	574.954	744.138	321.768	553.788	239.967	138.344	483.743	102.193	406.205	472.888	767.081	329.146	384.689	547.986	465.066	329.382	544.079	582.522	667.6	441.453	583.924	370.093	-1.63587	117.586	218.839	698.479	644.211	157.195	88.6778	264.01	404.969	554.594	534.741	268.487	433.228	716.444	424.719	382.906	777.163
100	354.735	410.856	349.734	38.3708	347.147	72.4723	284.779	172.947	63.8985	234.383	516.606	452.714	215.772	383	195.28	327.545	-127.179	1.26661	274.886	267.433	448.264	169.106	152.989	284.386	262.125	200.069	573.525	570.432	535.048	411.312	502.466	267.155	238.564	333.334	42.5015	566.482	431.938	-22.3857	-67.8524	369.487	401.458	602.197	704.158	437.327	325.478	630.03	363.207	317.643	517.403
105	100.297	596.058	599.467	295.262	501.111	456.46	298.608	417.26	252.335	253.32	680.302	766.277	327.792	350.161	245.838	547.222	159.518	140.577	296.965	398.217	134.959	349.083	496.311	374.947	435.451	506.403	854.865	522.101	684.268	439.689	472.623	282.36	235.108	152.594	283.781	443.72	785.548	134.107	-141.79	360.584	519.489	452.531	562.972	546.447	397.698	449.087	434.273	251.287	666.961
110	513.194	461.324	326.224	-19.9077	641.258	344.351	470.544	483.869	255.563	415.465	723.108	606.213	120.073	174.754	140.994	353.49	291.748	206.67	344.966	300.905	425.06	186.496	354.015	422.032	534.448	723.647	750.223	611.192	518.121	500.295	674.727	174.07	190.582	365.115	278.054	415.354	629.139	130.162	-241.292	442.177	437.933	403.017	361.118	577.737	447.679	518.663	641.975	323.331	624.447
115	168.036	618.529	476.081	205.888	494.008	331.544	361.724	405.88	335.035	321.724	470.475	458.069	410.458	166.308	344.909	483.563	230.193	228.009	253.117	157.472	559.438	109.924	418.686	502.374	434.267	378.233	589.103	567.839	465.263	458.271	528.834	519.75	-60.8043	271.828	315.612	504.775	618.589	277.818	-385.937	483.404	457	556.164	613.472	409.518	360.51	552.902	307.863	242.509	719.389
120	116.645	509.494	514.306	136.758	336.06	414.65	250.737	235.925	130.917	322.527	564.26	422.642	268.6	326.781	-26.5931	459.96	184.622	113.6	441.212	323.536	435.543	281.109	142.947	364.461	447.08	406.233	816.311	583.883	760.766	601.424	656.39	202.825	2.5589	248.927	147.155	403.294	568.244	190.652	-311.669	331.172	262.082	439.744	367.717	555.187	375.469	331.64	413.69	408.032	729.349
125	35.9791	502.046	300.339	158.273	350.439	221.942	327.217	400.15	203.146	250.818	470.616	871.583	388.442	315.145	339.585	617.509	9.34938	84.9771	350.727	243.765	409.809	293.93	262.691	345.647	422.019	350.753	495.228	334.462	369.946	412.86	506.762	245.166	138.182	181.186	-45.6985	287.716	656.269	151.964	-236.213	564.996	479.452	417.173	621.741	699.791	231.423	385.319	327.038	338.723	743.092
130	86.2573	446.757	262.094	133.699	484.946	381.502	402.972	413.769	448.324	203.809	417.253	522.871	314.602	185.865	250.938	421.434	206.461	66.0784	395.211	287.331	506.919	350.224	347.311	301.413	693.147	531.307	608.59	473.416	630.509	440.74	528.701	110.272	95.8261	127.036	170.931	689.368	596.282	142.298	-253.111	218.769	330.119	474.29	683.932	531.923	234.498	388.993	346.062	309.676	687.651
135	102.991	519.788	380.759	208.522	169.208	289.802	452.055	326.169	338.233	313.24	620.189	453.973	328.314	319.57	194.58	427.299	276.193	118.354	241.675	159.702	617.737	275.796	240.935	504.122	627.999	341.224	651.705	478.376	604.885	205.12	504.701	188.055	40.8091	56.3239	278.823	431.191	606.052	289.236	-361.806	497.595	195.826	400.922	531.92	470.426	493.21	385.28	250.484	407.429	569.472
140	225.076	416.354	537.977	346.063	357.683	342.545	462.09	372.777	184.3	159.959	475.518	502.714	176.436	187.3	290.752	423.147	106.112	109.57	224.227	141.054	363.901	-56.2305	221.895	376.902	555.081	432.722	595.982	481.508	569.169	392.263	546.24	216.725	65.2682	74.9578	265.391	346.887	415.042	-6.35863	-125.144	277.994	289.526	247.61	414.472	371.605	50.7141	350.413	305.842	291.107	476.284
145	235.167	568.564	381.557	102.663	718.202	230.289	393.012	337.793	79.781	263.272	410.09	279.529	280.037	334.866	343.251	573.242	270.914	9.03366	177.358	234.003	316.702	355.155	206.02	502.003	305.174	430.215	544.956	328.935	683.704	545.229	510.654	248.445	159.152	107.786	150.554	196.435	476.333	182.818	-301.096	292.208	291.541	222.839	445.663	658.2	267.086	495.663	273.912	351.343	658.961
150	137.21	300.06	286.59	68.7715	344.024	413.789	513.794	299.357	188.407	318.272	413.954	465.61	246.479	197.662	206.815	403.361	78.6429	45.7368	159.815	164.314	375.125	42.6418	280.276	343.438	496.365	368.772	561.201	355.037	714.784	551.957	520.675	226.582	58.378	205.819	306.682	396.318	430.88	178.205	79.4886	243.727	261.534	407.418	292.056	606.822	165.691	330.901	223.872	360.37	569.582
155	267.155	309.169	178.205	-56.4316	239.669	242.361	454.736	271.988	164.621	392.427	566.962	444.288	369.987	311.191	268.912	212.407	324.293	135.601	130.819	257.922	364.841	246.061	158.504	390.111	533.038	516.687	574.86	487.659	699.859	672.213	596.897	472.454	-78.9045	79.6073	-131.096	350.665	471.583	230.653	63.1184	478.993	312.095	318.156	268.139	566.522	139.818	625.878	304.237	367.241	700.395
160	632.143	551.662	271.468	-21.8337	335.025	511.695	170.37	177.33	151.426	346.32	338.892	327.611	304.053	305.454	271.999	395.934	195.153	-41.6596	298.216	249.158	412.877	81.4777	114.4	412.979	338.229	255.916	515.073	469.432	617.496	495.924	629.234	468.88	-12.4527	12.1364	125.835	276.916	683.094	61.7034	-426.556	271.822	318.104	380.212	527.227	364.359	196.316	458.843	317.146	299.456	396.961
165	425.26	537.652	-12.5693	9.40056	373.461	348.438	429.654	167.309	235.068	148.508	286.646	161.332	320.992	350.193	48.6733	535.022	170.599	112.689	259.8	288.213	362.681	118.366	365.127	239.654	233.878	394.439	579.125	307.778	573.348	316.62	471.527	544.762	-34.8886	258.35	222.139	159.259	466.252	73.1273	-156.192	324.757	443.936	392.189	322.045	338.615	277.051	526.043	308.143	59.494	593.724
170	470.12	470.437	261.018	6.86735	509.238	348.039	412.509	154.902	7.38035	288.69	403.856	6.38182	245.592	179.102	255.602	451.077	-46.1905	-173.961	373.782	44.952	259.125	120.32	288.179	201.547	438.93	372.171	552.622	624.717	468.025	430.591	586.527	223.681	48.9415	8.54113	202.336	340.205	611.066	-101.838	-80.8356	313.433	167.557	322.615	316.961	584.624	248.691	424.163	147.874	180.551	730.145
175	651.07	382.31	333.311	134.387	499.008	296.591	384.836	36.1135	-64.558	95.1903	406.707	352.095	228.279	149.856	242.874	211.992	122.583	11.2139	127.281	237.879	313.709	31.3551	220.767	210.293	98.181	424.719	717.447	383.057	398.901	414.385	465.369	163.866	79.0725	150.273	-66.7134	139.702	514.356	35.1865	-72.6245	257.5	239.69	380.928	347.294	472.979	345.197	360.342	196.454	376.411	384.599
180	515.793	544.13	409.86	-56.8144	308.205	350.433	376.779	154.094	-39.989	13.9727	324.111	184.944	37.6607	154.036	158.116	511.565	111.676	-45.1612	465.66	205.44	399.886	193.509	262.582	179.925	265.91	337.261	353.879	451.586	525.79	434.033	662.817	-98.9204	71.0938	198.962	26.4451	287.659	496.68	-13.4573	-90.4722	203.074	478.835	352.741	573.51	645.9	480.678	568.477	209.465	303.296	471.933
185	562.42	498.64	287.643	39.2551	320.056	333.289	310.172	-73.4048	82.0124	47.2321	368.556	323.562	245.334	86.0475	267.52	397.259	241.189	-168.152	124.283	240.129	174.358	45.1557	310.344	348.297	254.775	382.937	477.177	567.978	666.341	478.631	450.344	288.224	-148.419	98.3864	94.5348	277.674	413.5	158.169	-176.198	310.208	170.92	304.448	299.217	378.393	420.469	523.604	445.394	161.713	488.377
190	417.426	338.065	333.51	-213.524	292.119	-11.291	148.847	286.791	36.0784	-118.482	88.2249	-63.5187	144.61	128.21	5.75188	423.837	-121.321	73.0316	266.603	-47.0975	367.61	-107.194	-74.6421	243.488	-169.254	278.868	480.259	380.792	360.086	133.56	251.259	-195.347	-413.787	-103.486	-4.04851	149.432	477.453	6.18651	-271.573	269.293	88.9311	180.494	174.079	296.654	156.966	386.84	44.6443	13.1421	131.132
195	-215.121	132.402	119.307	-284.53	124.915	14.6403	54.5053	-0.38705	-119.528	-264.532	-35.7754	-72.9047	-143.447	-133.31	-39.0694	141.983	-74.1289	-215.82	-129.602	-115.417	-46.3317	-62.7504	-81.8556	-3.34881	128.614	36.9025	288.147	151.751	215.33	256.553	213.121	-92.3382	-91.6481	-107.954	-296.632	58.8645	376.571	-176.32	-346.261	18.5612	-91.2578	89.6837	108.882	-4.38516	71.1092	21.5546	-130.235	-47.1578	16.8321
225	45.4097	407.813	96.3182	-131.33	58.7112	233.031	221.974	188.449	158.676	7.07216	246.885	290.418	42.4028	188.134	98.453	285.197	-63.3821	-218.059	-45.3109	128.059	619.805	190.359	216.511	192.746	226.733	114.547	374.046	446.362	399.353	112.152	379.75	-37.892	-194.023	30.8732	-23.9181	286.665	381.918	173.397	-251.486	306.796	117.869	203.469	290.678	287.815	1.43146	211.752	188.649	121.589	323.895
230	651.901	621.197	334.8	-18.6284	61.7223	409.536	440.503	288.063	498.641	158.566	369.51	154.28	57.2806	-9.33675	265.668	311.141	100.904	8.33222	187.073	236.44	318.461	156.783	407.322	169.956	276.846	178.618	440.808	192.183	591.053	322.392	800.557	217.536	25.8187	-11.5359	139.838	235.38	189.822	76.8734	-217.717	104.531	271.661	397.355	271.984	367.31	224.671	374.152	296.952	49.8066	288.251
235	621.15	640.649	52.0651	-59.3046	-114.547	180.76	504.599	294.432	181.935	30.3378	102.921	324.163	108.563	204.764	71.8576	240.459	71.2705	0.30682	400.455	-24.3573	258.43	186.655	110.322	341.52	564.901	120.202	372.461	269.955	638.518	457.619	496.82	132.969	-299.144	2.47386	71.9515	442.364	328.397	62.1273	-153.776	370.213	200.559	387.482	489.472	329.783	135.878	216.087	35.0328	-57.3395	384.427
240	483.462	361.096	29.3248	-37.4292	178.665	258.517	176.922	322.338	135.007	-192.701	188.611	269.517	-93.8711	83.0855	68.8706	238.184	220.765	-29.7861	313.517	-0.39592	148.663	197.598	286.284	399.872	459.065	552.593	426.804	413.457	551.898	350.737	549.233	376.878	165.714	157.472	-109.233	233.01	397.424	-37.0969	-183.588	-11.0204	305.198	269.697	178.867	190.932	385.509	329.731	228.123	113.575	383.93
245	144.456	544.203	131.737	-208.173	243.5	308.841	559.932	238.706	31.0902	-96.312	402.071	278.859	-50.1131	347.296	164.71	200.804	113.153	-177.59	246.684	164.847	253.552	172.86	4.86873	203.22	629.622	444.757	322.205	190.531	743.432	497.771	330.752	-55.9189	-149.642	185.147	54.7459	141.731	353.833	64.9762	-203.056	45.7741	161.231	255.056	256.161	464.187	184.457	206.082	-38.7163	337.784	511.943
250	220.226	506.466	181.943	-139.739	162.435	46.4736	205.347	235.223	114.932	160.315	207.827	369.515	-116.308	289.435	122.96	307.295	-6.46964	-68.8343	123.792	6.85964	186.309	-94.681	147.382	125.938	276.41	618.73	194.308	303.931	777.581	463.132	565.697	110.289	-204.744	39.2905	38.5197	265.857	264.711	109.36	-170.516	188.322	199.142	178.515	54.4222	531.414	51.8103	383.174	60.7247	44.8469	457.487
255	445.112	430.617	420.115	12.7085	-59.4419	228.447	371.248	244.815	220.595	-8.30496	331.246	233.45	24.3667	145.847	77.9437	185.656	124.122	-82.1434	118.122	-27.0727	200.657	-72.6758	67.7333	231.319	382.001	180.515	223.856	323.135	600.844	580.314	334.786	-53.6753	-66.1231	100.505	-26.2735	156.685	232.083	200.162	-57.1418	277.508	423.056	171.852	177.165	491.427	173.359	275.316	-10.9182	339.718	551.808
260	183.811	498.367	138.443	-153.834	213.722	218.118	198.45	162.937	162.443	5.72292	173.942	53.8702	22.6565	144.405	153.905	213.33	-70.0888	-71.6996	-100.081	183.107	83.9034	57.1926	47.6139	149.451	404.469	135.93	319.746	496.282	835.775	410.315	459.558	-23.5855	-84.7921	72.8977	133.568	77.1443	166.65	-138.38	-132.001	38.7903	201.605	221.227	340.837	252.948	145.486	262.075	121.888	283.854	406.521
275	172.569	251.027	368.178	-66.1307	284.93	195.73	69.1173	96.6304	231.291	-125.619	115.964	151.785	263.377	259.325	-22.0105	406.245	166.411	8.88785	234	168.099	221.942	191.479	146.078	96.0469	263.038	143.342	214.083	234.297	342.881	209.138	436.025	52.6887	111.269	-75.5	-22.8223	78.6752	242.94	101.73	-99.2722	168.376	302.218	106.087	452.537	446.106	169.357	415.609	-176.314	183.375	363.777
280	231.184	354.788	183.233	-254.135	293.056	309.627	40.3473	238.807	169.618	57.597	68.7289	106.597	93.5694	211.415	-33.4336	266.293	-248.59	-69.8561	284.336	-67.6692	218.9	-173.136	5.79722	169.145	53.8379	73.0754	107.379	117.626	681.434	103.546	230.525	104.751	-233.931	-49.2446	0.42371	67.145	432.518	-68.8835	-178.845	-108.727	103.579	201.102	229.199	414.301	305.678	164.603	-28.0273	263.935	435.329
285	409.405	413.972	132.693	-174.336	77.3914	149.611	160.876	230.298	211.122	-34.5006	14.1669	240.5	79.8472	134.564	-73.0606	15.6717	-2.3127	-64.537	278.86	-19.6484	225.237	-22.0424	83.4131	133.848	-48.055	182.774	124.849	99.4154	550.323	77.4899	210.898	56.9644	-312.32	-77.6529	10.6807	54.1081	286.493	-69.9024	-369.415	246.911	312.189	45.3713	307.656	448.35	72.8814	103.041	129.959	51.3813	351.461
290	232.639	197.267	-13.8811	-121.133	115.361	181.005	359.493	81.1037	212.247	-13.9241	-9.03022	158.117	-26.3791	41.0178	78.2484	300.448	-43.6309	-273.686	129.22	-230.63	76.9552	-33.9758	120.439	107.641	164.391	56.7849	385.657	182.943	486.228	210.123	278.278	74.859	-130.779	-8.52853	-63.9385	360.289	189.189	91.7673	-303.698	79.9125	94.5977	147.322	259.76	477.868	349.624	205.223	2.8837	163.319	305.211
295	250.624	437.146	120.898	-79.7912	-52.1367	48.2683	23.2115	191.179	160.884	-204.772	183.808	-131.689	-111.393	140.755	51.4173	102.434	-123.251	-118.08	249.41	62.6734	-65.926	-5.00392	197.572	161.399	463.315	292.513	154.149	244.206	534.56	155.388	368.966	88.8108	-78.822	111.126	82.2653	82.9715	224.481	97.8338	-201.881	46.3607	148.185	144.167	238.634	351.914	187.464	220.343	148.788	83.2737	285.286
300	254.516	330.212	110.503	-206.975	-119.367	217.347	188.229	222.155	191.555	11.2267	331.052	552.163	81.4101	236.564	-24.8322	228.945	-112.435	-93.0081	184.535	148.128	-92.6641	71.4214	264.757	162.08	61.9987	193.122	438.381	366.337	577.865	161.295	398.487	122.903	-153.537	-2.03275	-96.0585	277.749	432.671	-97.0241	-227.799	154.023	8.17154	164.51	177.521	699.823	171.321	124.226	80.9418	158.44	278.369
305	140.789	-103.409	-22.7196	-282.761	-57.3634	-17.4951	34.3967	188.522	-16.9314	-334.645	16.5542	193.462	-135.401	-7.64266	-183.123	83.6842	-6.69048	-242.647	-94.5118	-146.414	-225.414	-263.135	-97.0878	88.4908	-75.4968	296.378	65.3475	329.605	356.109	-57.0057	168.774	178.453	-515.851	-272.835	-176.868	-154.983	21.3428	-304.747	-339.556	-19.3967	155.564	-211.069	-42.7421	187.817	-26.8061	3.24837	65.5591	-42.1103	94.9926
320	268.066	148.115	80.9316	-257.022	-66.1855	193.501	139.503	-163.673	-57.8061	-82.4642	201.618	-238.763	-161.549	-30.8163	-44.8275	12.7795	-53.3688	-240.49	82.4736	12.0371	2.78722	-227.697	-111.295	140.079	105.214	157.257	140.265	104.879	298.555	128.984	-21.2002	215.866	-15.9178	-152.511	-127.333	-59.2252	121.083	-264.291	-519.028	-62.0467	167.465	-17.2472	-10.6421	251.658	123.041	108.375	-128.682	196.309	158.813
325	112.043	-42.5185	125.795	-146.153	105.268	-23.6759	-15.7566	-400.798	-89.3154	-354.336	-32.9499	-138.989	-198.423	-110.492	-404.47	74.3172	-221.369	-324.402	-135.852	-291.405	-252.236	-156.962	-50.9556	209.293	-230.831	131.121	29.049	-13.1904	333.745	-125.82	65.0002	-43.8268	-620.511	-284.168	-213.129	-113.457	3.07372	-197.398	-187.938	-154.547	-90.4356	-244.207	-221.2	55.9384	-219.625	-91.3171	-346.955	-190.667	230.775
330	36.0042	-70.5771	-195.829	-515.555	25.522	-233.785	-20.2543	-494.546	-250.446	-445.819	-42.9019	-323.614	-512.953	-192.238	-379.241	-147.892	-266.811	-334.315	-293.352	-138.003	-221.392	-423.229	-258.029	-15.018	-232.642	-273.41	-38.7105	54.9486	65.5309	-132.712	-41.1169	-412.324	-584.391	-315.584	-302.501	-138.821	-51.4275	-528.581	-376.764	-214.859	-188.456	-344.619	-104.028	61.1229	-204.61	-233.903	-352.566	-466.65	29.4198
335	6.42157	-59.519	-201.524	-395.875	103.097	-264.525	-78.7584	-302.253	-200.58	-442.21	-50.2343	-188.116	-55.1431	-267.167	-360.155	-328.703	-275.053	-559.666	-84.1484	-408.017	-293.455	-288.994	-209.19	-166.825	-126.403	67.1349	-14.201	-35.5567	158.478	-228.221	-7.36329	-216.657	-294.291	-200.511	-284.707	-167.818	-70.8333	-399.818	-633.185	-148.758	-152.852	-397.084	-257.06	-62.6721	-448.353	-289.987	-552.226	-203.093	-182.218
340	-200.977	-369.572	-150.38	-671.072	-325.833	-275.598	-116.835	-645.721	-440.11	-632.666	-148.596	-306.471	-515.121	-332.519	-511.314	-210.37	-391.202	-393.895	-392.039	-413.936	-353.283	-455.945	-236.094	-5.42965	-258.152	-109.79	-107.49	-87.8949	1.02333	-412.119	-247.103	-428.683	-572.596	-376.883	-540.934	-204.883	-269.959	-475.771	-613.218	-89.9584	-283.159	-400.89	-260.917	-81.4573	-441.569	-195.578	-423.833	-263.704	-39.2061
350	272.836	-27.2983	-5.2592	-584.452	-231.069	-262.87	-208.172	-78.0287	-194.895	-368.408	69.5865	-143.3	-308.652	-385.145	-353.851	-102.409	-381.418	-535.854	-226.602	-215.727	-176.902	-348.917	-145.861	287.454	-54.1701	-226.889	-99.4823	-165.761	-124.905	-278.403	-31.5934	-280.292	-713.532	-271.685	-365.665	-216.746	2.16667	-434.576	-480.423	-290.362	-114.038	-220.455	-264.016	-81.5686	-283.417	-54.3855	-485.562	-315.482	40.5161
355	129.941	-251.127	-93.8612	-216.291	-3.41054	-171.87	-77.916	-267.86	-265.203	-421.656	-161.231	-317.598	-364.083	-397.56	-259.105	-169.822	-404.675	-385.561	-154.335	-152.485	-205.576	-476.701	-332.733	113.772	-229.335	-118.398	-118.462	81.9705	179.706	-345.237	-289.068	-132.729	-444.592	-233.434	-366.218	-154.477	-153.401	-545.211	-506.452	-177.999	69.2823	-241.749	-129.625	-86.7844	-113.718	-132.135	-404.668	-310.05	75.6637
360	190.94	-47.4668	93.5362	-358.987	511.029	-54.3813	-26.6915	-95.1178	-188.049	-361.54	-101.673	-196.156	-115.538	-17.3624	-177.66	89.6485	-79.1595	-325.743	-124.102	-135.608	118.073	-337.034	6.66313	409.655	-140.93	-92.3625	258.11	94.5543	400.211	-11.5304	67.2844	-74.7053	-394.293	-84.2644	-207.114	-55.7226	-75.5723	-346.818	-416.068	58.1936	19.7386	-179.112	-161.923	127.408	-343.449	-151.682	-259.408	35.0221	45.2105
365	111.723	46.5925	-73.6375	-419.374	-19.978	-107.27	-155.149	-368.693	-297.232	-405.219	-156.537	-269.593	-268.538	-303.923	-252.656	87.1728	-298.9	-489.347	-237.28	-197.396	-70.2494	-262.117	-153.156	226.875	-97.2864	17.9045	18.1766	-52.4968	-61.1596	-224.598	-126.358	7.28825	-478.024	-338.385	-439.227	-321.603	-77.5614	-330.009	-451.145	-328.561	-123.795	-148.987	-291.353	-155.071	-346.768	-113.407	-468.727	-187.307	-9.98947
370	-112.828	39.0617	194.552	-8.48378	13.6303	-57.0889	119.684	-49.54	-151.02	-286.108	-166.809	-224.086	-258.258	-100.543	-87.3324	187.008	-271.02	-270.325	-39.5796	-197.83	68.0423	-122.282	-359.864	246.054	-190.103	-60.1318	285.152	41.0646	306.713	-62.824	37.0616	208.171	-417.413	-132.803	-119.699	49.7276	69.4129	-338.936	-375.398	102.333	92.5595	-76.8702	-142.101	60.6469	-0.16991	-135.252	-190.011	-237.02	68.329
375	70.5513	151.653	-80.4124	-130.33	151.227	214.134	148.037	-85.6024	-112.156	-139.667	198.308	-80.1605	-108.8	-49.506	-101.176	196.059	-73.7208	-269.017	116.798	16.9688	327.734	-197.592	-91.6234	498.647	-22.7545	226.107	371.493	12.2592	311.109	-112.237	-97.5172	308.224	-349.154	-137.141	4.44108	-115.334	221.71	-47.2068	-243.171	182.764	74.8302	-37.4656	-61.4546	238.483	-129.622	-80.3967	-157.497	-159.357	187.953
380	464.3	178.033	202.527	-89.5111	305.387	244.432	28.8816	-76.9602	61.7135	-134.585	10.0424	-103.986	-141.652	-85.2603	-110.712	51.5138	-156.591	-210.91	91.6641	-28.913	49.6615	-129.581	-186.289	278.109	-50.3928	413.059	165.388	195.32	268.243	-74.4871	179.961	195.511	-504	-344.383	3.29724	21.3406	199.136	28.0108	-446.218	291.453	19.0505	-169.21	92.566	236.332	122.259	72.8236	10.8781	-128.363	239.33
385	285.459	201.8	51.6337	-160.882	308.803	119.531	157.701	-53.509	-195.27	-213.142	-16.4138	-23.4087	0.09936	90.5944	-163.38	197.004	-46.2525	-301.34	59.746	-89.5432	25.078	-29.5648	150.472	291.79	190.274	242.894	265.161	496.165	249.011	0.85315	182.296	86.1756	-72.322	-172.419	1.27441	137.2	330.253	-93.3607	-169.585	324.502	308.655	28.364	40.2222	342.163	-35.6157	191.872	-38.959	-11.2147	184.873
390	156.767	361.405	116.93	-277.924	26.3224	182.531	104.239	58.7712	-297.072	-180.237	157.968	-91.0717	-101.815	75.2728	-212.171	194.006	245.561	-146.625	-141.842	-209.628	62.338	-286.824	-47.7798	555.937	154.427	64.9535	371.655	110.595	473.42	191.516	203.003	436.731	-180.569	-47.7767	-132.06	105.024	156.218	-44.2857	-207.074	374.553	92.5869	268.585	94.8941	310.823	-39.9055	86.4718	-153.139	96.0568	173.949
395	462.247	313.556	38.6364	133.07	199.008	210.9	152.552	27.3691	-82.6183	-109.004	67.8537	-55.6696	-119.948	100.326	-49.2486	314.995	-134.098	-100.043	102.119	76.0315	103.921	-54.9337	-96.0587	446.763	-61.2013	222.368	411.932	343.936	371.471	-73.5731	93.5149	282.219	-144.095	-39.2658	-7.22443	223.39	222.658	-278.786	-355.291	544.643	201.556	-33.4738	477.381	214.328	138.194	222.187	-19.2582	9.1605	298.423
400	-38.8397	249.196	-90.0318	-305.516	180.847	181.767	100.914	-106.182	-317.729	-227.335	14.3465	-213.99	-96.072	-135.206	-137.519	-67.8039	-161.095	-257.07	-78.8583	-175.608	-193.857	-249.298	29.928	388.114	-76.9156	92.9884	310.729	52.9869	283.237	-20.8518	70.1337	-120.648	-307.532	-141.545	-163.628	-18.3278	321.646	72.6472	-62.2374	185.724	105.912	-170.758	-1.55903	306.545	-315.79	-57.8701	-138.849	-100.746	284.961
[truncated: 23 more columns]

## Sheet: DtolC_Stat phase_3
Time (s)	1 bg subtracted unnormed	2 bg subtracted unnormed	3 bg subtracted unnormed	4 bg subtracted unnormed	5 bg subtracted unnormed	6 bg subtracted unnormed	7 bg subtracted unnormed	8 bg subtracted unnormed	9 bg subtracted unnormed	10 bg subtracted unnormed	11 bg subtracted unnormed	12 bg subtracted unnormed	13 bg subtracted unnormed	14 bg subtracted unnormed	15 bg subtracted unnormed	16 bg subtracted unnormed	17 bg subtracted unnormed	18 bg subtracted unnormed	19 bg subtracted unnormed	20 bg subtracted unnormed	21 bg subtracted unnormed	22 bg subtracted unnormed	23 bg subtracted unnormed	24 bg subtracted unnormed	25 bg subtracted unnormed	26 bg subtracted unnormed	27 bg subtracted unnormed	28 bg subtracted unnormed	29 bg subtracted unnormed	30 bg subtracted unnormed	31 bg subtracted unnormed	32 bg subtracted unnormed	33 bg subtracted unnormed	34 bg subtracted unnormed	35 bg subtracted unnormed	36 bg subtracted unnormed	37 bg subtracted unnormed	38 bg subtracted unnormed	39 bg subtracted unnormed	40 bg subtracted unnormed	41 bg subtracted unnormed	42 bg subtracted unnormed	43 bg subtracted unnormed	44 bg subtracted unnormed	45 bg subtracted unnormed	46 bg subtracted unnormed	47 bg subtracted unnormed	48 bg subtracted unnormed	49 bg subtracted unnormed
0	0	0	0	0	0	0	0	0	0	0	0	0	0	0	0	0	0	0	0	0	0	0	0	0	0	0	0	0	0	0	0	0	0	0	0	0	0	0	0	0	0	0	0	0	0	0	0	0	0
5	155.967	-87.2911	204.252	101.731	89.0104	9.43197	-9.52538	103.037	23.6558	129.96	-1.7155	-210.671	-216.212	-390.655	-222.206	-162.873	190.703	15.5549	0.79238	-243.98	-149.427	-113.207	114.396	-96.0669	-109.73	184.091	-36.3333	218.449	-168.395	51.5395	100.354	-282.461	-106.638	349.638	5.0168	318.842	-65.6013	-89.046	13.9135	-35.2656	70.612	-364.233	-87.776	254.493	-153.282	6.94167	198.863	-270.518	-114.745
10	189.798	-363.749	326.716	197.79	-92.6977	174.27	46.1277	-126.264	-90.6645	201.523	195.783	-233.386	-30.1741	-414.775	-43.9992	-25.7162	-28.4623	-172.094	67.1179	-22.9529	198.443	-27.8314	-172.735	-52.8974	108.167	35.235	112.445	114.799	-117.64	116.004	227.848	-316.857	-137.728	227.269	-36.2906	220.003	-16.9636	131.948	-138.906	34.7325	480.592	-228.854	-161.583	297.544	-225.939	183.981	248.081	-90.7151	43.8494
15	229.808	3.37745	110.792	41.7072	49.413	162.166	15.642	-241.295	-120.283	-24.452	73.7888	-89.4436	-146.943	-294.18	-51.3214	-69.5297	25.5838	147.188	-313.856	24.5918	85.5269	-244.854	234.877	-110.917	42.2951	-70.8815	-26.5405	178.928	-54.0236	-49.9814	-32.7809	-233.957	-461.794	427.631	117.345	315.763	-113.694	151.831	-208.708	100.739	258.12	-66.3419	241.185	151.621	-132.3	95.9901	84.1542	-299.239	100.908
20	-114.554	-182.57	-94.1018	-90.812	-189.627	-48.1183	-192.394	-24.8748	-265.75	-32.5089	-317.848	-244.887	-447.959	-478.14	-339.321	-119.13	-28.1955	-16.8672	-51.9057	-131.812	-157.585	-382.973	-88.9441	-268.683	-116.702	-265.895	30.4521	-70.1293	-214.744	-148.592	-27.8389	-241.215	-124.415	279.599	-247.479	151.452	-233.205	-1.70621	-457.857	-9.02878	10.602	-219.739	68.2922	-58.9263	-167.047	151.614	-5.88722	-238.029	-59.549
25	119.272	193.565	239.329	109.107	51.0472	144.46	-98.1751	68.7112	-108.962	-4.41229	137.458	20.8449	-232.668	-344.208	276.969	-236.242	-6.46711	23.3335	415.317	83.4254	136.924	-112.456	-26.5858	-111.459	-238.444	116.123	-194.662	124.561	64.9354	-340.294	120.829	-174.372	127.224	596.404	-113.573	382.337	48.2893	91.4697	-233.548	84.1602	181.769	-167.054	111.206	270.736	-104.724	-54.6917	334.172	-330.779	-151.801
30	294.992	37.2523	562.576	314.079	90.6604	281.713	-44.0405	81.0148	4.30577	36.0357	143.745	171.45	-90.6961	-110.123	320.345	63.4927	159.754	-40.1438	238.182	-40.5856	132.65	-146.945	186.749	-28.2485	162.288	-66.0628	-77.3762	-5.24794	-133.469	30.2726	-42.6176	-112.446	62.1749	219.467	13.3804	406.711	105.333	205.155	16.6885	221.329	496.246	-30.2247	38.6969	106.868	72.7353	414.986	289.474	-124.98	168.255
35	320.259	173.545	358.849	414.229	65.2727	190.132	0.06668	198.154	187.322	267.233	177.335	61.163	-116.245	-247.434	356.042	-107.96	-10.7895	115.018	355.293	94.2313	0.63187	-130.571	206.92	-111.264	403.629	-37.7707	67.2667	26.6647	-377.298	66.5054	166.955	-370.269	42.98	413.462	-261.139	249.056	110.36	133.709	-17.8068	129.141	405.911	-21.7631	126.11	160.21	214.028	40.352	346.741	16.3045	222.09
40	329.366	22.4407	522.963	251.175	80.9216	231.978	153.176	63.1502	58.3614	118.223	124.889	104.501	-221.711	-382.904	29.958	-4.42715	-94.9447	238.163	31.9401	102.076	115.001	-65.5268	-22.4039	227.431	318.917	278.12	-17.3971	218.57	-20.6843	3.88462	58.5386	-127.379	-123.153	227.053	-84.4234	460.7	198.648	270.27	15.766	0.96643	156.06	-66.3786	210.477	166.632	73.3522	324.369	238.288	-555.648	95.9043
45	289.15	190.601	659.568	264.662	80.9149	443.283	-47.1582	612.647	-219.674	276.617	16.5362	162.058	-151.487	-349.75	76.7312	404.143	116.207	186.497	268.92	119.223	101.844	6.17624	-64.0798	279.89	157.023	287.86	-45.2575	125.346	-65.3146	64.1639	24.1914	-20.0243	172.806	395.617	-94.1021	336.07	-27.8636	346.724	41.3182	130.069	280.162	212.313	-2.46032	138.776	163.854	488.256	308.098	-195.753	33.9519
50	379.473	222.638	589.456	224.45	163.927	279.75	-7.79206	210.973	-129.774	97.4938	73.3067	-32.4388	-99.4646	-329.974	-51.1714	10.6606	-40.9408	-35.4353	118.057	-38.7906	-60.1015	-86.2901	249.834	199.233	50.0213	-115.496	110.744	192.946	68.449	-163.384	-160.962	-92.1563	20.8001	121.519	37.87	449.31	66.3057	-7.07116	-108.966	85.7303	268.277	183.921	69.1413	272.809	-62.6496	266.517	181.078	-222.815	94.6733
55	111.355	113.13	485.263	204.32	148.309	203.962	55.7223	158.923	80.6577	176.358	92.4857	-61.0134	-76.1878	-359.73	-61.2902	-63.7905	-69.3139	107.988	140.599	39.0836	-158.11	16.3879	614.689	143.363	28.9167	56.8028	-3.46333	282.056	-77.0574	-24.8367	-2.61828	-13.9218	-85.5049	222.034	170.118	559.626	199.549	523.034	-91.5619	-0.49073	266.028	-38.5723	71.8831	121.015	-289.993	9.92576	236.36	-297.425	132.972
60	392.836	182.005	231.598	120.034	108.135	215.666	160.626	185.225	44.1342	542.018	240.383	-73.4291	-183.407	-177.085	-107.502	48.9614	184.17	1.2179	-19.904	-40.282	250.681	-269.554	232.424	112.263	194.217	64.6005	-71.5615	115.449	-134.845	24.8403	97.412	-37.8186	119.559	105.851	-38.3347	479.82	106.441	-55.7895	-301.056	317.785	260.466	-130.419	352.342	469.813	-102.115	36.3024	284.945	-358.412	-148.433
65	319.562	182.257	460.571	283.151	-57.3235	236.233	118.859	282.661	-41.5442	141.615	131.526	-31.7935	-92.9704	-24.5454	194.326	144.088	196.288	-103.851	47.5741	41.0185	38.6391	-361.604	50.9725	173.579	192.783	37.5333	60.5167	-359.194	-251.441	-74.8447	137.652	-191.023	-108.043	218.285	-161.002	560.175	187.79	62.5521	-299.693	63.7267	176.362	-34.7269	251.714	266.71	-149.062	252.229	242.688	-261.868	198.635
70	248.176	60.3137	528.453	153.989	-171.615	350.181	-16.6672	152.283	-135.919	264.078	353.594	29.7476	-332.551	-45.7635	142.462	-20.2299	-232.816	59.9855	173.345	-111.386	162.154	-227.365	157.097	79.7412	-17.3671	17.3361	-132.076	162.144	-308.186	-42.6099	92.1239	-126.441	-249.767	129.889	-125.101	653.835	-9.07416	-103.676	-342.922	-11.3316	160.2	-245.178	-98.941	122.219	-21.1894	-0.68455	120.333	-555.053	-130.431
75	324.511	168.001	379.878	343.989	87.8333	236.133	61.6895	202.511	129.453	538.65	177.737	271.652	137.816	-178.983	264.739	-206.145	-9.00724	333.574	134.871	129.46	206.604	32.0879	54.3034	164.943	246.045	229.627	186.671	1.51279	-348.795	119.07	184.174	-5.95449	-194.236	316.302	-154.472	436.305	179.742	335.035	-44.2182	127.154	247.779	-78.112	-133.571	292.823	49.3504	292.79	202.477	-356.92	138.156
80	369.544	154.682	660.417	453.797	82.1226	278.831	38.077	576.757	-157.469	312.573	243.547	32.0624	-116.887	236.291	170.55	163.519	17.1306	71.0418	180.614	100.537	394.148	-268.832	244.975	98.5623	180.647	314.611	-86.2247	187.698	-241.811	361.154	212.466	18.1486	-312.181	471.488	214.146	553.505	253.32	206.373	-62.9434	128.118	497.65	-102.9	488.682	419.729	-24.9004	125.53	-108.069	-190.303	127.777
85	0.99627	246.307	471.714	329.126	130.585	245.89	-182.177	431.865	-45.0147	526.129	178.284	-29.8837	77.9671	245.089	-1.79365	-25.565	5.32237	106.789	193.238	-49.5027	89.6054	-60.2519	483.501	127.774	216.494	250.549	323.277	400.259	39.4572	-160.605	20.0649	-70.0419	-73.4291	443.238	-10.3546	461.044	110.075	53.478	45.7633	-42.2926	179.035	0.4784	140.8	285.844	-276.851	105.715	-91.8304	-120.347	197.886
90	661.587	506.634	494.727	281.873	154.549	413.528	15.6384	458.141	-206.153	333.995	251.236	152.973	-190.985	-182.613	138.794	-61.9523	85.4857	-77.5994	276.226	50.1375	386.54	-135.617	171.018	198.349	95.7628	-53.8485	-5.92778	329.542	-91.5343	-234.758	118.695	-138.844	82.0507	220.289	6.07835	358.662	329.334	71.8312	-175.636	300.089	367.489	177.255	376.262	405.5	149.391	233.35	-153.63	-263.122	74.5585
95	351.301	382.075	616.7	380.694	59.0341	341.495	166.525	300.231	-88.9166	278.509	161.227	381.427	-64.0153	-66.6269	-100.504	88.622	128.121	44.4601	300.211	68.4181	347.466	-205.903	421.418	312.741	339.768	40.1934	-168.3	154.266	-62.4161	17.8219	163.343	-146.551	-284.23	343.675	178.407	587.226	198.033	67.9271	-72.194	-31.6807	190.769	-144.72	-154.25	177.519	-69.41	320.894	-105.488	-241.742	318.436
100	258.727	267.918	714.361	351.653	527.413	173.286	97.7917	220.504	-260.412	383.828	339.66	83.8144	37.6592	-210.433	280.975	105.57	43.4386	-1.89701	323.741	-83.5098	183.436	-231.817	227.718	12.3326	227.145	15.0576	203.978	297.499	138.827	132.568	275.429	87.5475	163.944	614.601	57.5304	642.734	160.669	199.227	-72.7307	-119.198	301.529	-85.5738	226.059	306.182	416.409	116.704	-116.997	-114.211	143.041
105	317.251	179.883	700.687	10.6031	118.85	380.443	190.215	493.11	6.6641	424.17	297.858	169.165	134.246	-34.0931	45.3755	-17.1116	-154.493	113.223	177.884	213.231	211.587	-17.2035	442.251	187.144	181.523	219.203	462.986	135.888	-107.289	122.913	268.381	-32.7349	131.606	683.198	133.12	671.706	50.075	111.414	-285.448	241.226	285.611	166.746	-73.1589	252.293	-49.9993	140.664	-159.129	-487.604	73.3505
110	249.906	376.358	651.646	313.197	-213.841	45.9526	-57.7652	73.9811	7.74231	379.119	242.594	398.688	-21.0352	-10.9432	13.8036	-133.371	132.163	172.274	231.543	-67.8089	286.774	62.9072	78.9202	213.191	139.431	344.707	188.863	542.356	36.6251	87.1037	100.893	-165.979	52.7002	393.419	1.02887	613.574	139.736	317.918	66.9627	252.42	677.769	130.555	138.1	305.338	129.516	36.0504	-326.693	-345.134	186.742
115	172.643	110.344	256.792	388.686	30.4434	479.322	94.8034	208.142	-164.207	96.3896	194.607	-97.6607	-106.357	17.9677	-22.7589	-99.5853	29.7003	258.355	439.137	-9.10208	53.5795	41.5804	469.561	96.4658	222.903	83.6659	-140.541	483.327	-124.69	-13.9176	182.564	39.4816	215.465	728.217	-188.241	700.722	132.835	219.825	303.346	380.536	397.263	-137.356	266.9	413.304	-42.2822	254.869	-204.726	-93.1132	90.7644
120	243.833	237.644	573.626	78.0972	84.963	376.345	55.553	184.689	-50.9261	422.309	222.039	6.61409	133.337	-234.126	-110.368	97.0338	4.00678	7.75775	298.734	-210.508	-49.6856	-58.1339	177.221	-21.1945	180.395	311.395	-1.37222	7.23043	-58.7063	-2.42308	-129.953	-278.115	-228.509	367.712	-129.11	714.922	18.8313	105.398	-111.639	177.827	155.671	19.4365	-241.68	59.5259	-84.9579	110.914	143.65	18.3413	34.5032
125	494.603	285.266	494.023	390.128	64	347.825	-99.7225	473.292	-257.687	394.705	458.495	61.6198	135.062	-151.863	234.29	237.365	-77.8067	83.4189	264.472	139.234	181.55	-148.938	43.8655	132.333	257.12	303.944	222.952	503.166	-121.595	59.2838	87.9355	-12.1642	-22.7856	264.627	48.1929	673.861	212.744	-27.8193	-114.987	292.477	320.504	296.379	140.605	273.891	95.6704	204.767	-25.8262	-309.553	-56.0308
130	195.568	79.4262	401.104	277.152	81.8404	158.324	62.1228	518.37	-173.922	221.273	86.2816	67.6055	181.754	-122.695	280.826	99.9195	-218.138	-171.338	460.956	-53.016	157.249	-70.2633	294.8	-48.8071	164.417	228.238	258.843	300.369	-276.999	106.722	110.668	-158.737	-201.058	155.63	-220.918	512.651	-121.64	5.55995	-353.171	86.7372	302.621	-68.4435	-19.2671	435.963	-180.979	54.476	176.016	-345.771	-31.0644
135	254.31	116.191	366.022	108.404	74.0192	191.906	22.4611	243.029	-304.369	328.924	235.486	94.835	-256.491	-79.2263	81.1286	-262.304	-190.791	232.642	508.59	-192.676	274.617	-121.729	192.738	149.153	147.454	57.9011	187.817	76.6788	-122.993	-218.394	39.6493	-380.115	-330.303	485.836	-30.9983	248.694	-214.253	140.101	-202.704	24.4956	329.195	-89.7426	159.045	396.949	60.1702	169.011	88.1458	-293.092	119.956
140	253.7	-75.846	571.652	378.936	227	200.959	-83.9456	419.997	-301.768	250.335	384.491	229.294	-172.211	148.481	164.479	52.4032	225.89	-104.381	-28.325	-60.151	300.705	-1.22917	360.89	20.1223	-67.1859	121.22	23.7309	143.218	-267.794	-171.718	7.4593	-74.3136	-36.8824	319.239	32.6537	415.01	51.7614	181.171	39.3218	20.4292	321.792	80.9567	315.686	129.258	-111.956	266.011	213.884	-218.861	184.451
145	375.382	180.815	565.465	316.16	-101.74	183.389	138.629	462.59	-123.816	155.787	356.597	204.68	-189.362	183.382	115.218	339.208	-59.8947	2.88094	284.023	-115.362	-106.595	-153.683	127.568	227.623	48.3654	-26.0202	64.1595	146.447	-114.85	25.9693	264.109	-120.638	-168.891	530.058	-29.8696	594.116	209.071	253.242	48.9479	-95.6166	304.102	234.033	-276.706	36.1384	-1.62939	249.383	66.8756	-196.953	48.4172
150	142.662	129.823	402.489	308.644	2.87755	190.859	46.8537	135.892	3.9098	462.416	307.34	-35.0231	-67.9594	-37.6288	100.196	73.0338	25.9141	5.98837	330.711	35.6629	164.458	103.689	266.001	28.6226	380.774	61.505	79.5167	43.6463	-75.2536	6.58376	139.983	20.1933	-163.185	250.592	12.8804	415.016	-13.9933	273.382	-4.73115	186.377	266.772	-220.23	-137.76	358.294	117.187	204.669	63.9928	-398.4	221.374
155	317.295	95.9843	456.234	420.204	13.6932	220.269	-108.621	351.327	-233.148	529.477	317.254	142.656	-439.287	-9.88444	85.8071	89.1879	-80.1988	331.174	160.435	49.1592	146.938	-250.301	324.982	31.2624	62.9437	-30.892	237.077	22.2257	-236.461	17.0949	149.106	-145.387	8.94586	203.05	241.405	354.538	71.0465	109.288	98.8767	-5.80845	217.847	31.3534	-21.2143	206.579	-47.2493	-77.0444	-22.6119	-361.979	186.322
160	259.763	-118.764	283.183	204.984	10.1277	313.328	155.99	462.71	-101.283	398.83	441.886	37.916	244.281	-2.63406	109.542	133.959	249.76	287.804	249.814	48.3518	139.244	-84.7847	189.193	115.11	257.947	53.605	197.759	124.792	68.269	-274.705	271.723	-15.5459	-194.695	345.207	-17.9571	418.523	20.7943	201.32	-45.9065	175.745	446.495	-98.5236	164.9	222.322	146.928	209.889	277.859	-227.511	160.553
165	134.798	42.4389	393.857	388.239	-113.393	252.903	97.8646	288.237	-236.92	86.0913	-78.2547	118.389	-496.738	484.955	-175.933	-213.746	-76.7222	115.062	53.6306	-46.474	-231.608	-220.806	81.6664	-95.818	16.0113	64.75	7.86852	-52.3561	-225.106	-162.558	-293.805	-278.562	-240.066	315.372	7.89234	103.113	-326.136	-60.9419	-16.9321	-164.843	63.2376	-306.804	-249.229	-65.3141	-158.16	-187.574	-15.4916	-231.364	115.664
180	88.0824	-152.747	276.613	309.961	104.99	158.405	320.412	247.612	-218.866	195.848	65.8354	216.847	48.5893	-105.825	241.071	141.709	169.923	-27.7495	229.205	143.541	126.381	-39.1181	277.078	145.459	66.8313	132.488	-59.173	238.282	-23.4216	166.773	-34.9407	-128.899	-58.5605	173.581	-141.567	339.729	4.94671	66.1734	-78.5539	167.23	368.004	123.401	2.23739	162.776	72.7807	336.197	90.4131	-268.731	208.1
185	128.9	-346.526	418.536	305.016	113.84	240.35	288.04	58.2182	-120.164	431.991	40.3635	75.4881	147.659	-76.2254	360.156	83.4217	93.9065	190.768	367.955	-63.9696	119.813	-128.417	180.059	-66.738	225.279	-28.3987	201.608	-53.6972	-205.017	66.3065	175.743	-232.188	-78.2856	471.47	-100.467	309.683	-27.618	286.906	104.338	147.939	42.9746	97.7027	-74.6464	92.5009	128.053	326.067	362.908	128.653	368.425
190	184.234	6.79569	360.134	183.734	52.4479	458.916	175.277	107.504	-78.2563	306.283	246.719	-50.2619	-193.682	27.0393	117.55	-7.81622	-6.90789	-149.076	413.248	-0.27917	314.094	78.8444	-46.8702	114.61	46.7094	118.645	428.534	-169.466	-38.1358	53.7353	-86.0935	-164.93	1.25	203.129	-206.064	443.301	-87.8081	155.282	-156.908	152.462	221.843	66.1789	-178.43	46.9009	239.525	315.255	139.105	-237.134	188.974
195	103.851	-41.0126	137.259	119.26	-114.06	96.0178	180.962	173.318	-79.7026	379.05	152.715	-333.428	-298.441	-189.33	108.762	63.9607	54.6886	201.363	410.454	-184.145	151.296	126.782	277.94	59.68	248.131	448.905	110.914	25.1388	48.5803	232.113	-265.633	-39.4646	-184.233	131.723	-43.0663	176.813	7.75303	181.553	143.774	117	318.716	8.48845	44.1043	249.838	-24.7678	435.756	104.688	-328.413	396.608
200	123.736	29.215	186.602	-44.9206	38.3	14.7923	137.323	73.5237	-351.977	307.145	381.9	-288.517	137.713	-240.779	173.05	139.353	182.257	-150.159	180.91	-199.091	134.027	-127.44	25.8375	142.529	285.587	222.849	318.367	129.207	-287.231	-41.1597	-92.2718	-137.711	-118.12	348.323	-83.7743	521.565	34.5072	77.4635	112.252	202.79	121.102	81.8625	-170.456	228.655	70.1444	31.2085	-60.4248	-134.603	74.8536
205	98.3671	213.984	264.716	139.186	113.48	167.272	114.6	236.577	-126.284	235.683	91.3371	-0.73079	-17.8264	-386.451	-92.042	-25.4345	168.487	80.7339	283.693	54.4892	41.2438	-118.717	268.055	84.4878	439.387	93.3058	152.535	252.728	-42.4197	213.179	-105.486	-82.2926	-218.428	320.124	110.777	399.694	-156.639	5.833	-52.8954	29.4333	248.81	33.9805	-30.5553	281.101	321.404	122.096	-332.844	-55.9596	186.986
210	41.9982	135.019	287.801	157.449	-154.717	124.727	91.9835	54.8362	-130.741	505.281	-22.0377	-233.345	-42.0513	-349.864	492.497	-87.9231	81.6792	195.13	460.912	99.6638	19.1972	17.8854	292.388	28.9331	320.801	-54.55	284.475	75.1066	-60.0671	122.954	-306.653	-12.9627	-163.529	158.153	-38.8818	471.373	-88.6727	191.609	-49.1579	68.6508	87.3569	19.5769	196.823	277.73	77.3111	-90.4894	-149.562	-111.145	392.623
215	169.394	18.3168	122.965	161.922	-65.6604	46.1321	-21.6174	214.672	-271.653	432.279	130.389	-155.045	-86.8152	-225.361	108.825	-45.7021	132.005	11.5608	122.655	-67.9423	43.5581	-314.997	46.7276	103.19	-69.5722	-72.8855	239.963	173.285	34.5907	60.871	-166.37	-174.199	-52.3837	127.06	-292.102	294.218	157.285	209.782	-314.405	5.31098	256.962	7.74559	-160.853	608.791	43.3579	419.4	-525.574	-88.7965	270.608
220	132.569	45.2429	311.378	-59.1562	-94.8261	93.5816	222.148	132.978	-181.618	416.004	105.478	-279.648	-75.9037	-421.348	333.99	43.5771	-72.2624	152.707	96.2741	-87.8729	69.4193	1.83036	-21.7316	57.4846	-64.374	-3.15227	-26.5302	60.6034	-92.1328	12.2666	-307.26	-397.398	-61.0327	70.2062	-112.533	523.872	-75.1356	97.8158	87.8218	31.0517	138.085	79.8789	-54.7293	186.636	-39.4967	159.458	-82.0668	-265.382	286.108
225	397.605	52.6055	475.933	197.25	114.233	103.296	-47.9789	291.327	-220.707	309.612	168.403	-66.7349	-222.599	-116.983	219.956	-41.3032	0.73026	12.1279	111.39	-33.69	-28.6704	-2.7006	56.8105	174.89	-23.1262	64.8136	413.283	172.609	-292.089	78.9377	83.8157	-238.52	-139.981	248.567	-178.804	539.422	-86.7636	48.8771	-34.0146	-88.1598	146.13	-208.115	70.1237	200.426	122.91	187.522	-473.862	113.209	148.819
230	231.076	79.079	154.079	8.25108	75.9583	332.747	130.7	255.827	-202.08	323.389	97.9853	46.8886	-422.181	-308.886	155.823	-77.3687	5.10889	-5.29994	192.796	-116.449	337.789	-193.979	137.304	-43.7636	203.646	-215.438	-26.0111	115.95	-55.471	-3.95513	-377.299	-455.542	19.4193	155.629	-152.341	295.262	-108.516	243.338	81.3218	-97.1256	163.313	143.746	-66.2293	193.996	-210.307	108.418	-233.671	-140.16	130.534
235	234.464	-1.23931	228.411	-51.6388	24.6389	337.776	415.245	23.836	-52.842	197.469	238.39	-3.13619	-68.4017	-113.369	-22.7121	-40.9896	59.1567	-102.758	245.481	-81.4962	-62.7245	-377.312	259.142	-86.4538	54.4405	-168.163	155.383	1.49073	-261.415	16.5449	-201.265	20.6486	-161.132	199.753	-86.7777	564.318	73.6036	221.535	-40.6964	64.6381	131.065	-162.26	91.1667	518.405	65.4122	370.232	-288.545	-395.297	155.018
240	168.938	254.896	279.429	-7.26919	67.7593	198.646	96.171	157.75	-380.638	281.687	-176.921	70.5267	-95.2675	189.687	282.007	127.593	29.2251	165.472	241.201	-6.03472	-5.2881	-107.078	25.5315	50.7808	48.4542	239.166	36.8667	79.0863	-157.107	191.1	-342.966	-271.693	126.699	168.933	99.4042	623.611	98.3397	374.844	81.9044	-155.948	96.7872	-102.595	379.08	43.2759	83.8268	277.71	-52.0945	-4.95263	280.969
245	94.0611	-112.156	247.593	54.4974	-3.82143	-72.9141	265.266	195.761	-182.274	412.377	311.669	-37.285	-104.939	9.70455	-128.7	74.7354	-8.14474	247.03	342.089	-189.269	172.139	-75.8803	-85.9537	-142.712	274.837	-13.2028	114.108	173.941	-208.592	73.5171	-194.924	-476.638	-233.588	4.03611	-51.8178	434.353	-215.638	-64.982	-162.483	0.01469	-5.84058	21.5487	-57.3147	315.208	166.499	93.2341	-262.544	-244.864	112.988
250	166.119	164.621	249.379	-27.7354	58.4894	-70.1468	98.7257	106.504	-288.719	248.89	-9.41818	-53.819	-130.628	-614.483	212.345	-90.5824	169.382	-148.184	20.3241	-139.959	-8.47601	-320.396	226.877	-117.014	-15.5102	-148.342	264.448	283.873	-51.941	206.816	4.87597	-45.6511	-120.741	240.339	-265.237	370.634	123.892	279.837	-26.1729	258.002	127.396	19.5092	51.3505	160.037	5.01308	123.073	-271.941	-89.4769	250.811
255	158.473	-14.1184	90.3405	126.367	29.2041	155.257	305.068	113.717	-422.347	249.8	286.873	-60.4119	-232.599	-61.2887	-42.9368	208.719	-36.859	130.859	134.238	64.0125	-142.542	-205.815	-171.842	-60.3622	185.002	-298.027	174.558	89.3596	-290.155	188.374	-203.405	-224.809	-124.395	430.421	-291.343	334.939	-132.536	33.5678	92.8093	27.9748	98.4202	-115.427	51.0952	217.562	-90.3556	154.314	-139.629	-363.065	125.002
260	279.279	165.138	235.996	316.031	40.46	58.1225	236.098	291.171	-317.159	10.5475	287.647	-157.579	-245.322	-374.554	253.429	159.049	186.627	162.547	132.637	-232.213	9.66288	-208.908	-100.077	-47.752	-7.84583	-104.316	475.477	129.038	-31.4325	202.105	-206.969	-223.836	-19.4236	210.952	-270.455	432.368	132.9	173.311	26.4218	38.9835	49.2824	142.802	168.046	241.063	-102.139	99.7667	-0.68309	-336.527	243.562
265	214.361	-186.145	77.6666	77.6303	-38.2021	79.3558	114.181	85.3185	-144.699	303.375	340.143	-47.9148	-399.344	-230.483	64.3036	-217.459	-186.784	-70.9922	13.2729	-13.6737	-2.65617	-163.062	-168.018	-97.4538	40.4167	129.973	87.5792	-27.1669	-84.951	-39.2051	-332.169	-389.861	31.8493	242.067	-226.991	413.313	128.959	-192.132	144.822	-87.4194	151.459	-163.236	-95.2714	196.344	-123.415	214.169	168.512	-295.701	-28.0852
270	124.186	3.07783	231.065	-49.3249	-69.2789	69.2262	80.8353	18.0173	-255.223	129.632	173.095	-279.933	-75.3016	-383.568	-166.978	-364.053	-110.395	-104.357	117.137	-208.852	51.7374	-115.082	138.078	-38.1975	-218.929	20.6719	-135.57	140.678	-326.462	-57.494	-187.514	-381.549	-174.588	393.828	-256.973	227.172	200.882	208.183	-96.9853	22.929	251.611	9.25	-121.166	94.2861	-100.554	291.902	217.307	-244.365	220.506
275	141.199	208.898	169.732	36.063	19.5918	86.959	129.983	48.0125	-351.39	88.5212	219.334	-289.168	-234.601	-342.856	73.9991	-223.358	-36.6298	99.9027	-151.453	-105.884	117.753	-323.801	167.509	-197.606	15.4572	-34.3346	289.933	77.7277	-57.4773	-78.7264	-440.014	-345.286	-119.969	82.1355	-135.65	333.058	166.609	92.678	16.0583	-47.0469	-4.74542	-99.8852	-79.4435	37.0259	-142.064	134.835	-119.281	-118.867	63.242
280	-234.768	-3.89339	145.149	67.413	-69.3095	4.46245	312.15	-17.8927	-305.814	158.755	7.2108	-372.245	-65.8227	-103.894	300.263	-417.337	-202.208	11.5112	149.534	-65.3	341.001	-131.392	143.206	-39.4468	-88.9976	-124.397	47.178	102.528	2.71883	176.842	-365.632	-132.761	-285.35	117.699	-103.061	467.146	116.42	-29.4851	-267.238	-292.817	172.284	-88.1867	-159.541	87.2106	-1.48927	4.11894	209.431	-372.228	389.164
285	285.755	-113.434	221.793	55.4053	20.9375	-20.3044	63.8832	65.4743	-365.751	13.2411	-229.402	-82.9094	-295.828	-566.212	360.054	-73.3007	-60.1447	2.93972	-27.4522	7.27939	119.154	-345.479	178.841	135.18	-20.2175	141.416	-123.156	60.8363	-28.8627	87.3818	-136.616	-177.204	26.2771	200.967	-15.9696	467.683	-104.792	178.693	-306.75	-378.934	155.044	-241.7	-203.023	-6.61629	-69.9725	92.8917	-256.191	-675.797	134.751
290	74.0496	85.5607	277.522	199.204	-93.5217	62.2679	143.5	215.678	-432.986	224.251	202.412	-230.191	-101.801	-242.481	-75.0634	-378.766	-246.659	-164.543	129.484	-214.863	48.4295	-199.04	141.543	-91.9056	-87.3208	-164.52	-35.6433	-254.442	-270.665	-263.538	-210.752	-378.412	-223.233	110.966	-113.35	272.238	284.585	-27.2274	-16.9699	-403.035	104.667	-151.756	185.429	174.257	-309.691	149.95	-72.4488	-447.981	219.688
295	105.985	107.764	201.114	-15.7633	33.4889	-137.973	44.0368	188.445	-251.15	65.9781	-135.738	30.3417	-549.518	-395.191	-81.3214	-237.798	-314.995	-207.092	160.589	-308.044	87.442	-133.763	42.017	-50.0616	152.745	-9.82394	-177.948	100.966	-68.7872	-82.8938	-359.173	-124.884	-232.124	296.675	-270.092	324.753	264.952	33.3871	-146.477	-65.5806	30.2831	25.6717	-38.5179	116.733	-215.43	299.948	-258.329	-338.04	145.764
300	161.751	178.577	501.709	34.6257	-32.4111	-53.2109	171.707	267.171	-227.274	258.822	517.677	-130.176	-383.224	-216.47	144.81	-211.627	-233.751	-185.313	-236.56	-198.929	-26.4343	-22.0863	260.006	-173.755	269.36	-175.655	-9.76905	74.6421	-213.8	-4.54827	-383.771	-401.242	-79.361	310.861	-359.63	292.95	-60.2043	98.1827	-99.0819	-62.7904	28.7502	-114.107	-400.696	150.582	-316.747	31.0167	61.0798	-344.539	159.88
305	254.014	118.287	124.078	36.8789	-10.1146	-0.24964	154.27	-99.4227	-239.002	-61.5598	79.9698	-157.022	-287.206	-327.316	166.6	-390.804	-477.429	-213.107	-97.9721	-204.644	-14.3562	-325.581	-77.2316	-152.776	-139.905	-191.119	203.22	-115.612	-399.566	-105.003	-397.089	-70.4555	-87	88.2811	-394.212	157.776	-273.63	1.36684	-61.3782	-210.266	148.121	-61.0496	-234.155	201.659	-200.593	221.957	-259.051	-541.174	-102.001
310	211.168	-67.771	596.866	-99.831	18.8077	89.4891	201.009	201.633	-162.348	99.1776	-67.1599	30.9432	-89.9754	-333.329	108.41	-85.1133	-339.43	80.5044	113.306	-375.455	76.9407	-256.083	180.506	-131.623	50.3221	-106.994	92.153	142.884	-317.51	-175.966	-336.791	-101.1	-367.611	257.207	-249.815	262.394	-84.9213	60.0289	-125.433	-355.647	-73.9343	-191.904	-302.808	35.4009	-105.1	-1.63958	139.806	-389.617	14.7415
315	69.6191	-272.504	277.839	127.367	-53.4694	139.25	4.50726	116.025	-362.823	-170.021	45.5131	-359.758	-72.3927	-527.255	25.8036	-358.602	-194.214	-55.6356	-87.1717	-96.7465	-39.1705	-204.058	-120.127	-158.127	268.079	130.692	134.775	61.9989	-189.255	0.10099	-374.545	-301.048	-135.755	464.675	-509.965	445.848	122.392	-59.7846	-257.659	-172.811	71.7739	-60.4044	60.8424	293.888	-267.703	68.6104	-125.179	-648.26	133.432
320	160.77	-184.952	341.06	143.745	-16.2889	-153.599	65.82	78.8681	-499.585	120.197	-144.394	36.5087	-332.177	-179.618	222.595	-308.136	-115.28	-156.181	-175.377	73.9413	256.295	99.0923	32.8689	-102.595	-22.705	129.554	167.892	136.361	-111.8	73.9581	-217.093	-199.125	70.9673	126.943	-279.173	153.771	-127.521	256.089	93.968	-72.0074	107.654	30.4101	-15.9881	189.257	112.664	362.244	37.3245	-364.345	194.289
325	-143.995	-121.484	17.8325	-358.005	-303.18	22.1225	-93.5102	121.837	-540.452	-26.7573	-66.3797	-166.962	-266.186	-601.622	-179.956	-391.46	-67.5714	-203.903	-38.698	69.9952	189.184	-395.112	44.2892	-279.015	-52.6603	-160.617	-49.2561	31.3356	-475.926	-105.946	-507.175	-387.371	-260.141	19.9583	-303.856	39.9601	-152.264	-83.4219	-246.703	-19.5197	3.32753	-306.915	-12.6714	-167.841	-473.607	67.158	-92.7104	-549.442	-18.7585
330	-175.397	108.671	56.8329	-232.302	-362.759	-29.2317	-47.8142	-105.429	-682.697	110.334	-114.792	-324.591	-296.202	-232.72	-83.2464	-537.564	-316.938	-226.569	-200.34	-7.1125	-3.07045	-362.833	102.148	-400.319	-133.981	-12.9488	-5.14462	-76.3196	-254.344	-106.184	-564.723	-456.601	-117.628	-115.781	-127.605	253.629	128.009	140.062	-253.556	207.452	89.804	-302.872	63.2834	148.343	-229.299	-29.7229	-236.366	-475.322	-138.189
335	-293.876	-546.12	-204.506	-321.314	-416.206	-325.296	-226.433	170.385	-636.92	-175.698	-127.915	-418.598	-521.974	-360.598	-133.466	-509.777	-377.124	-77.6156	-409.958	-166.194	-21.083	-440.104	-134.759	-309.755	-256.263	-217.917	-14.7333	-430.995	-425.978	-390.525	-829.139	-429.961	-374.253	55.1235	-429.681	2.34516	141.522	-434.176	-191.229	-247.402	-130.518	-274.412	-407.201	181.012	-482.956	-195.546	-382.254	-348.933	-120.956
340	-260.872	-316.943	-66.6552	-281.206	-250.154	-157.878	-117.742	-264.254	-491.158	-30.1931	-42.1621	-255.652	-338.98	-573.854	-259.267	-432.678	-270.802	-175.698	-202.056	2.1498	-19.1816	-264.129	-208.815	-65.5081	72.7039	-276.075	271.874	-62.5243	-245.634	-145.466	-623.267	-449.494	-146.702	-74.8726	-266.407	276.801	-58.3723	64.1998	-285.312	-35.7266	70.5293	-346.449	-17.0197	156.679	-344.354	24.9235	-4.39521	-639.138	-60.7158
345	-138.486	-310.42	-33.3259	-182.567	-421.049	-227.53	-186.224	77.613	-606.801	-128.197	-308.228	-618.932	-446.897	-837.802	25.4164	-491.265	-339.674	-138.476	-243.561	-190.739	-301.114	-426.753	-269.104	-315.485	-375.389	-392.846	-250.025	-75.0571	-190.579	-347.02	-554.374	-501.562	-126.443	-247.978	-601.627	263.694	-279.501	-117.873	-452.515	-248.833	-29.9962	-352.872	-187.778	110.34	-460.993	-132.224	-211.889	-772.723	-348.648
350	-475.727	-488.611	-338.087	-755.824	-514.25	-398.233	-428.655	-463.928	-707.844	-354.552	-502.339	-767.552	-911.876	-876.18	-343.684	-811.538	-401.978	-535.375	-687.545	-183.568	-261.488	-809.551	-339.573	-515.228	-469.003	-395.47	-391.059	-482.47	-383.844	-515.711	-783.212	-814.135	-614.867	-354.14	-566.205	-230.071	-684.509	-550.76	-495.684	-507.635	-276.987	-475.64	-645.541	-43.9614	-406.43	-227.567	-356.378	-683.957	-420.019
355	-333.134	-266.741	105.345	-322.903	-360.774	-271.258	-469.386	-440.35	-806.128	-393.191	-427.729	-496.765	-629.604	-532.187	58.6716	-578.377	-485.218	-377.721	-544.25	-385.839	60.0153	-301.75	-6.60364	-354.43	-213.75	-283.885	-324.686	-260.276	-515.094	-203.416	-732.525	-436.457	-30.6611	-220.394	-335.458	-164.135	-368.665	-267.75	-396.187	-432.559	-30.7472	-489.8	-245.469	-281.981	-256.376	-80.3872	-474.754	-690.239	-220.392
360	-275.438	-404.042	7.16587	-130.025	-510.01	-238.184	-501.887	-318.986	-398.916	-221.302	-300.361	-701.487	-389.087	-608.4	19.117	-960.766	-429.016	-364.366	-456.22	-108.069	-78.9091	-457.241	-204.782	-297.786	6.69167	-133.736	-101.533	-345.735	-48.8648	-304.293	-438.508	-598.628	-257.41	-141.398	-262.874	245.705	-258.372	-81.0112	11.7372	-629.334	-30.6747	-545.397	-370.221	-225.15	-513.467	55.158	-149.883	-387.492	-54.2691
365	-24.3193	-80.7977	370.178	129.479	-199.968	221.1	-192.915	107.809	-357.647	135.215	-86.0566	-166.412	30.4522	-396.606	341.46	-365.276	-450.159	-210.189	-294.134	42.4516	231.13	-448.57	62.6674	-116.356	-200.925	-130.04	66.4073	-164.642	-242.155	-90.7459	-396.578	-218.1	-214.644	252.262	-247.479	347.951	-92.8975	226.591	-27.9417	-220.247	70.972	-98.2621	-249.808	50.2759	-3.87212	218.542	-156.344	-93.6624	-134.189
370	-15.3913	1.67913	381.075	-146.192	3.24528	180.557	-274.859	266.295	-110.785	-28.4911	107.682	-129.97	-223.658	-484.861	244.471	-281.681	-424.264	20.9462	-347.09	-9.97614	151.804	-655.217	-119.35	1.92466	-88.4671	-231.305	233.878	94.4107	-215.832	-170.205	-597.557	-389.31	-368.659	35.9686	-256.417	29.614	-349.6	-31.0729	-26.4292	-330.498	232.377	-7.80826	-384.621	139.711	-266.989	-32.5016	-57.9785	-255.394	-31.684
375	13.0554	-107.252	355.103	-19.1173	-286.156	19.5941	-188.179	-94.9472	-410.124	190.6	-22.5705	-247.036	-556.906	-350.342	125.972	-488.169	-255.653	-141.304	-279.003	-26.5946	-115.39	-271.184	35.0007	-62.2989	-112.233	-138.553	72.0345	84.0652	-103.401	-17.4088	-651.215	-451.836	-335.428	-92.8481	-158.926	257.186	-152.255	46.7878	-183.039	-358.111	-153.571	-114.796	-308.661	68.3668	-222.327	109.473	-587.387	-543.891	86.1509
380	72.349	-96.4958	198.173	-97.5286	-53.3152	109.981	-25.6961	-60.2005	-297.503	-139.198	24.2365	-241.084	-382.068	-217.569	230.815	-422.246	-288.934	-26.846	25.9994	29.6784	-33.7587	-127.808	28.2773	-104.935	-59.3159	-175.568	-151.952	-117.12	-234.595	-131.171	-460.501	-395.792	-581.838	-163.376	-360.626	321.013	-157.609	-64.5085	-267.378	-296.761	199.266	-253.265	-237.234	-248.593	-501.077	13.3619	-346.849	-412.568	-279.092
385	226.633	-352.988	374.142	-197.559	-143	-80.9877	-174.289	-137.541	-483.19	-23.8872	111.068	-400.142	-413.582	-358.023	309.994	-481.839	-511.842	-273.163	-400.699	-281.486	-9.14545	-364.095	-124.535	-251.284	-164.017	-105.961	-248.168	-38.9946	-119.512	-197.438	-565.257	-710.336	-412.419	-72.5644	-620.923	115.596	46.346	82.2938	-217.585	-228.977	88.6898	-291.448	-352.302	-172.349	-273.504	52.0114	-237.118	-536.31	-38.5761
390	-90.6621	-9.03209	398.086	-44.8672	-163.917	83.0669	192.229	21.0356	-360.166	143.847	98.2528	-361.157	-250.084	-364.291	309.317	-462.645	-381.552	-275.582	-112.011	-68.9875	-58.9948	-352.502	-104.179	-274.015	-180.083	-125.612	-245.883	39.9267	-285.647	-181.694	-577.911	-391.013	-240.667	130.018	-161.063	278.951	197.32	-79.4933	-47.3509	-229.216	56.493	-46.9747	-123.348	138.407	-371.851	148.038	-308.618	-433.162	7.79341
395	148.487	-22.1856	337.051	73.3314	-113.51	-32.1389	-442.841	-179.191	-224.715	90.7421	-16.6226	-75.6423	-72.7535	-210.952	219.246	-774.258	-472.927	-207.291	-238.523	-90.2252	-167.951	-257.392	-23.0798	53.3629	-193.801	-17.9141	-255.483	-89.1887	-269.788	-146.483	-697.646	-414.997	-352.403	176.713	-204.802	312.334	191.891	-91.7657	-224.838	-67.439	87.2055	-97.2247	-187.557	-246.391	-313.51	350.517	-411.157	-279.675	-59.0467
400	6.34371	-35.7098	314.388	-56.0005	-37.08	-191.632	220.096	164.268	-583.267	-197.37	-2.27167	-162.654	-138.988	-415.99	213.211	-486.341	-153.973	-200.213	-428.829	-125.657	-95.8182	-162.902	16.6874	-107.611	-265.878	-26.3642	168.046	-48.0311	-191.4	-380.333	-532.446	-519.296	-196.05	86.3368	-403.146	42.2393	-49.0501	7.63545	-34.8782	-157.041	-9.8222	-175.291	-182.634	-123.557	-346.128	-101.744	-428.669	-130.942	17.7274
[truncated: 39 more columns]

[truncated: 3 more sheets: DompF_growing_1, DompF_growing_2, DompF_growing_3]
